# Supplementary material for: A Modular Cytokine Analysis Method Reveals Novel Associations With Clinical Phenotypes and Identifies Sets of Co-signaling Cytokines Across Influenza Natural Infection Cohorts and Healthy Controls
Source: PubMed Central journal article supplement (PMC6594355; doi:10.3389/fimmu.2019.01338), 2019-06-18
Supplement: Data_Sheet_1.pdf [file Data_Sheet_1.pdf]

***Supplementary Material:***

**A modular cytokine analysis method reveals novel associations with clinical phenotypes and identifies sets of co-signaling cytokines across influenza natural infection cohorts and healthy controls**

# **1 SUPPLEMENTARY FIGURES AND TABLES**

## **1.1 Figures**

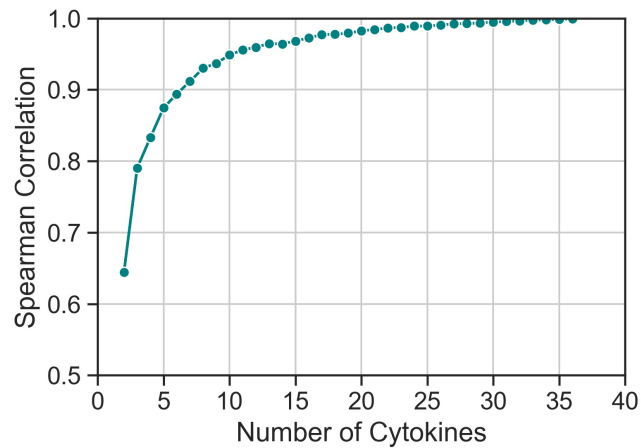

**Figure S1.** Subsets of cytokines were randomly selected from the original set of 37 cytokines in the PICFLU dataset; their size ranged between 2 and 36 cytokines. For the size of 36 cytokines, 37 subsets of cytokines were drawn, each containing the entire set of cytokines except for a single cytokine that was left out in each. For each subset size between 2 and 35, 50 different subsets of cytokines were randomly drawn. For each subset the adjustment procedure was conducted over the selected subset and the Spearman correlation was computed between the adjusted cytokine values of this subset, and their corresponding adjusted values over the entire set of 37 cytokines. The graph presents the average median correlation across all 50 subsets, where the median was computed for each subset across all cytokines tested.

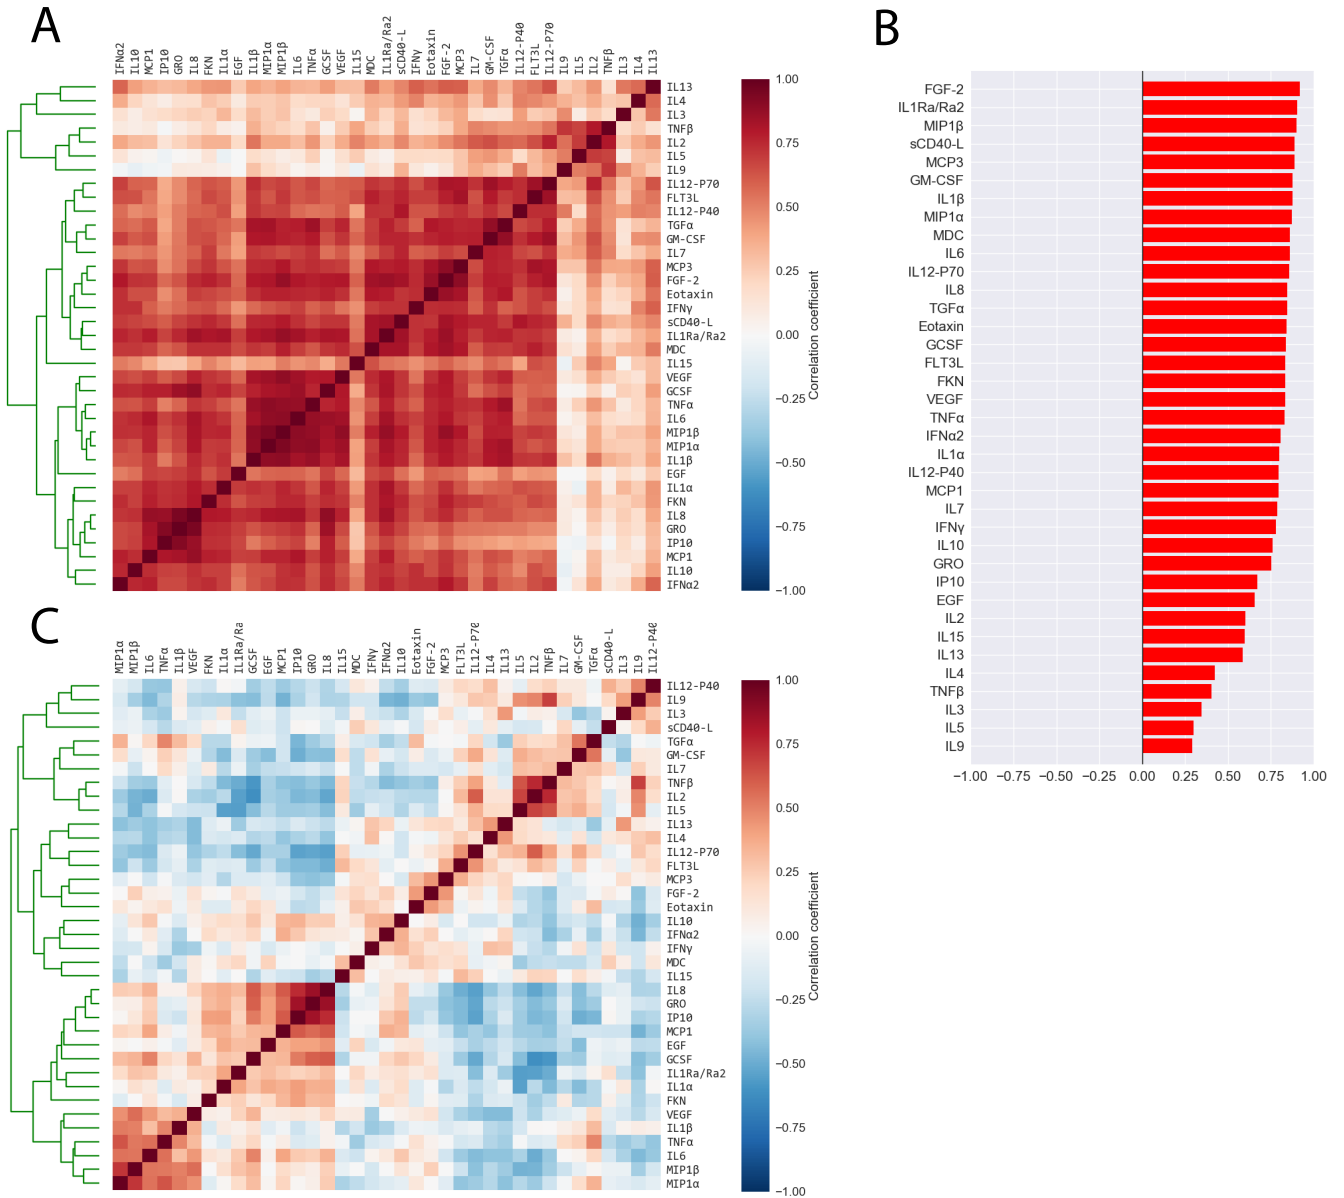

**Figure S2.** Cytokine levels are highly correlated to each other and to the mean cytokine level of each subject. (A) Pairwise Pearson’s correlations among the absolute nasal wash cytokine levels in the FLU09 cohort. Cytokines were sorted along both axes using hierarchical clustering (complete-linkage). (B) Correlations between cytokine levels and mean cytokine levels for each subject. (C) Pairwise Pearson’s correlations between cytokines following adjustment to the mean cytokine level (see Methods for details). Cytokines were sorted along both axes using complete-linkage.

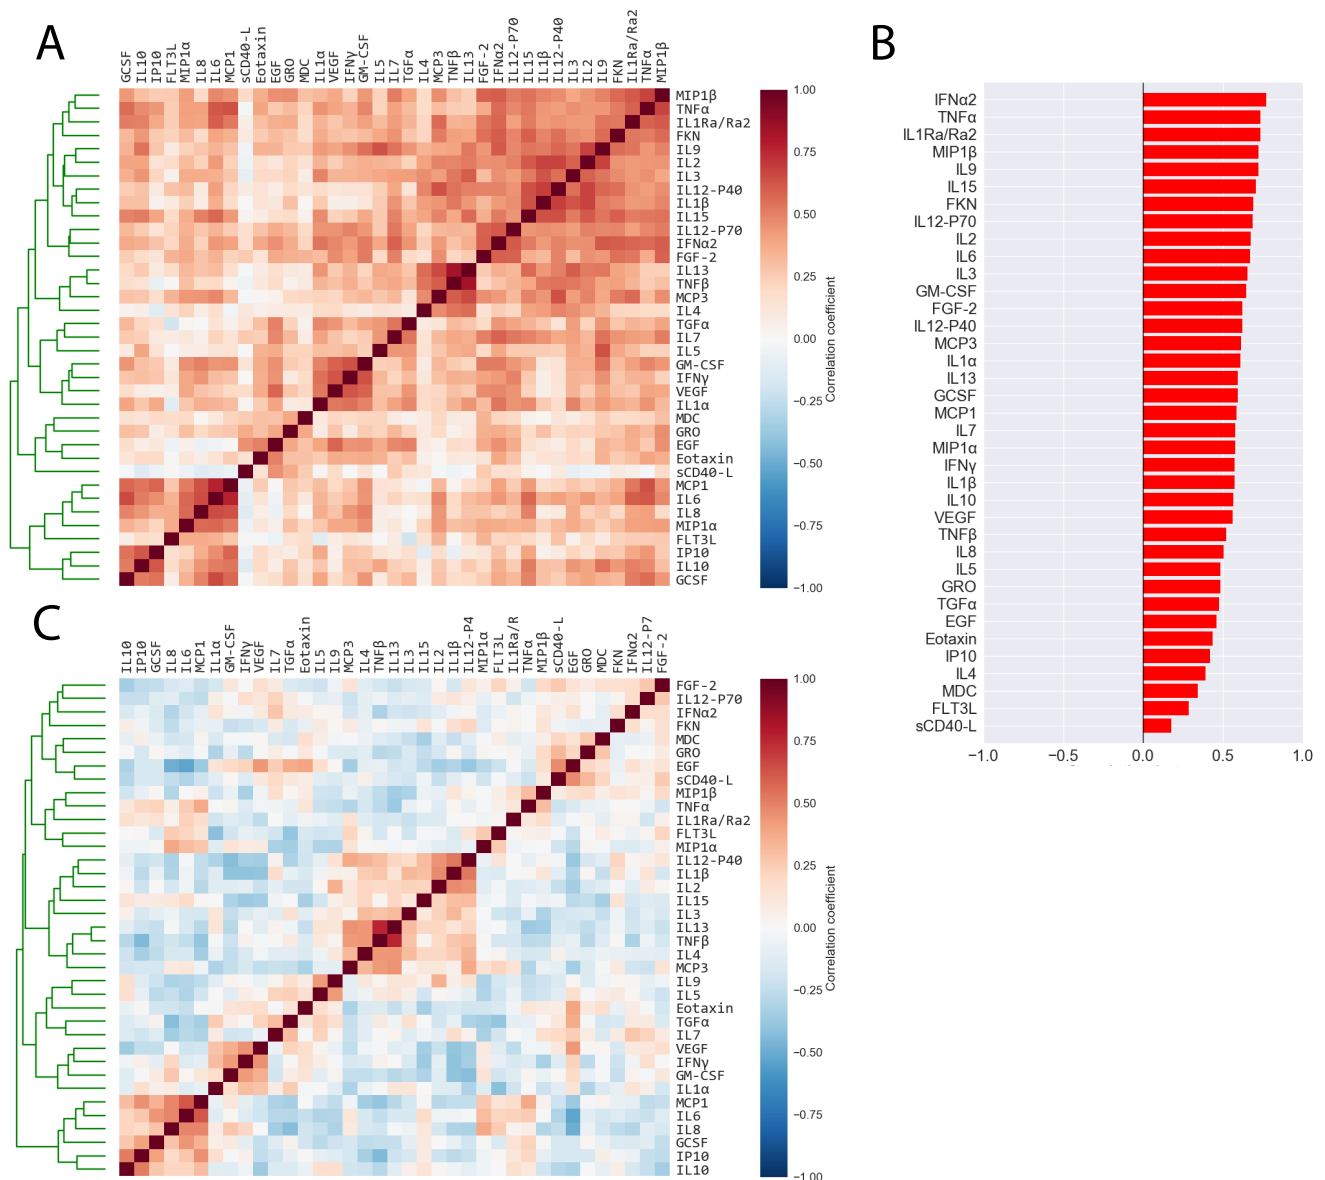

**Figure S3.** Cytokine levels are highly correlated to each other and to the mean cytokine level of each subject. (A) Pairwise Pearson's correlations among the absolute serum cytokine levels in the PICFLU cohort. Cytokines were sorted along both axes using hierarchical clustering (complete-linkage). (B) Correlations between cytokine levels and mean cytokine levels for each subject. (C) Pairwise Pearson's correlations between cytokines following adjustment to the mean cytokine level (see Methods for details). Cytokines were sorted along both axes using complete-linkage.

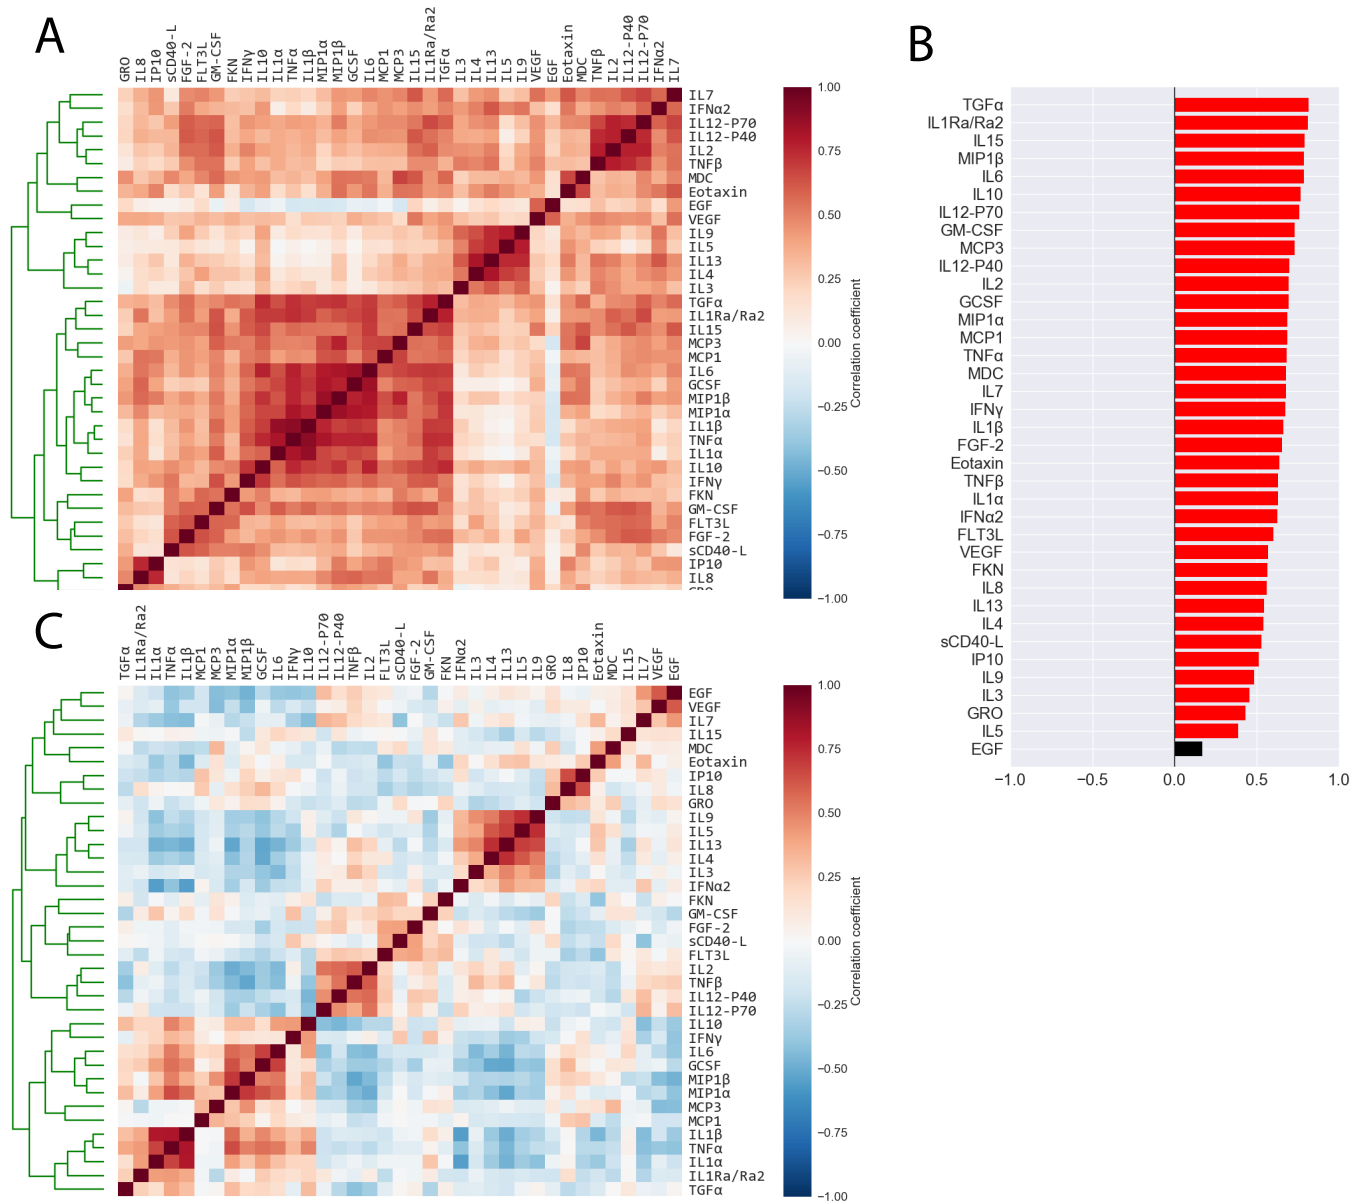

**Figure S4.** Cytokine levels are highly correlated to each other and to the mean cytokine level of each subject. (A) Pairwise Pearson's correlations among the absolute endotracheal cytokine levels in the PICFLU cohort. Cytokines were sorted along both axes using hierarchical clustering (complete-linkage). (B) Correlations between cytokine levels and mean cytokine levels for each subject. (C) Pairwise Pearson's correlations between cytokines following adjustment to the mean cytokine level (see Methods for details). Cytokines were sorted along both axes using complete-linkage.

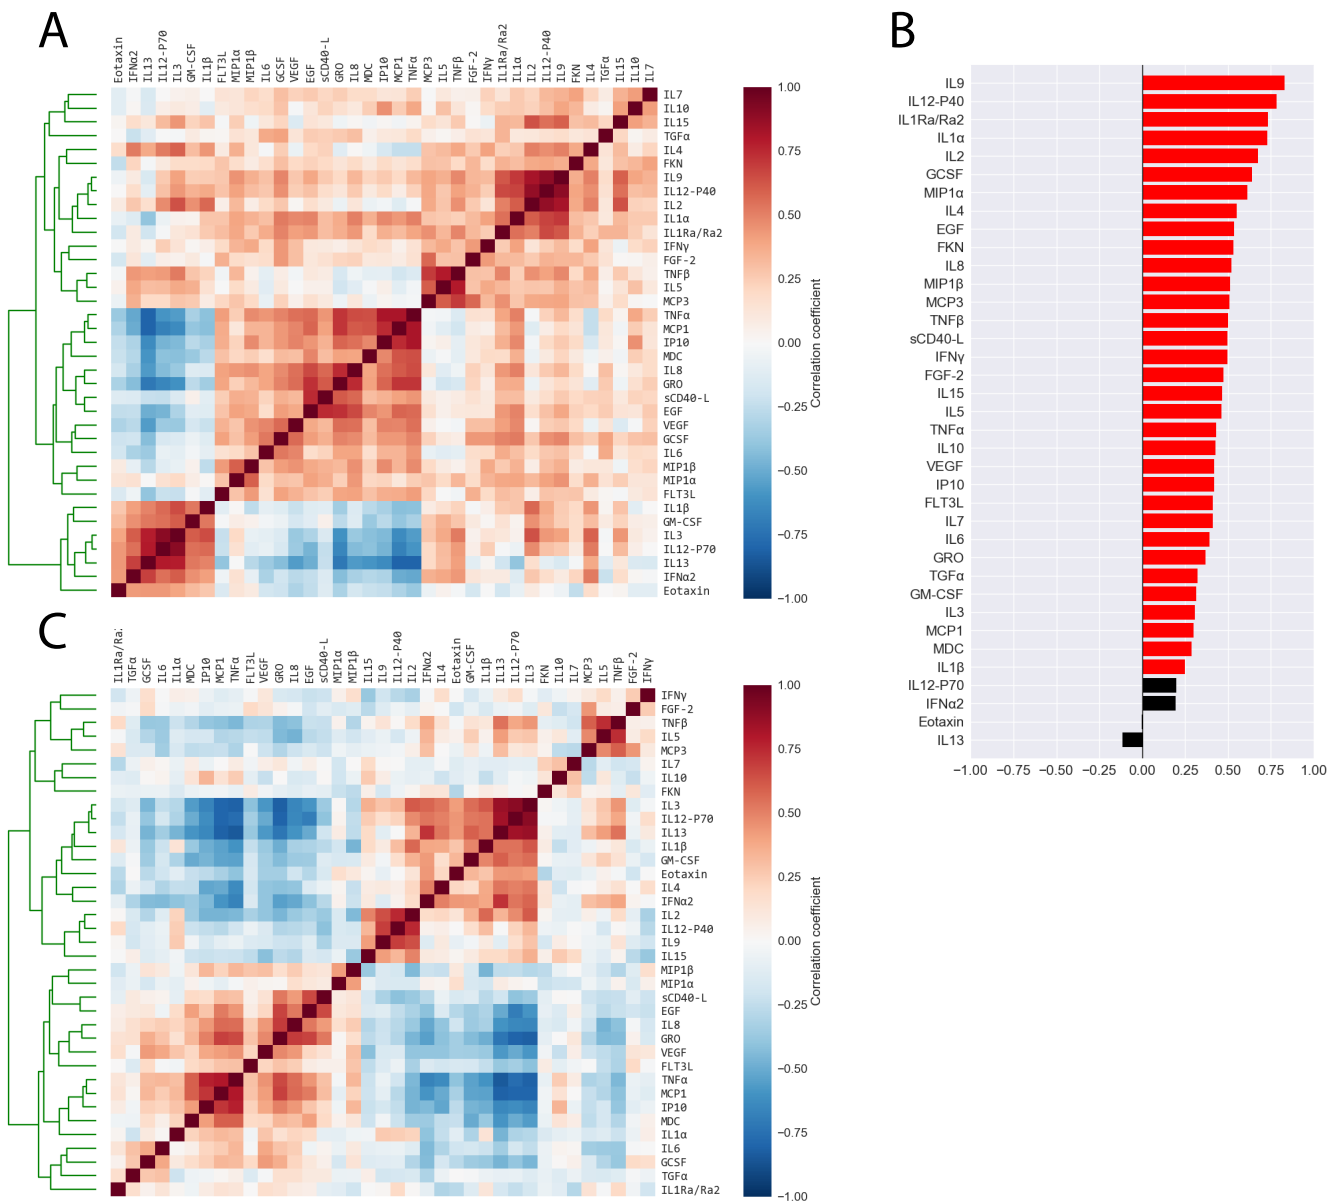

**Figure S5.** Cytokine levels are highly correlated to each other and to the mean cytokine level of each subject. (A) Pairwise Pearson's correlations among the absolute serum cytokine levels in the SHIVERS cohort. Cytokines were sorted along both axes using hierarchical clustering (complete-linkage). (B) Correlations between cytokine levels and mean cytokine levels for each subject. (C) Pairwise Pearson's correlations between cytokines following adjustment to the mean cytokine level (see Methods for details). Cytokines were sorted along both axes using complete-linkage.

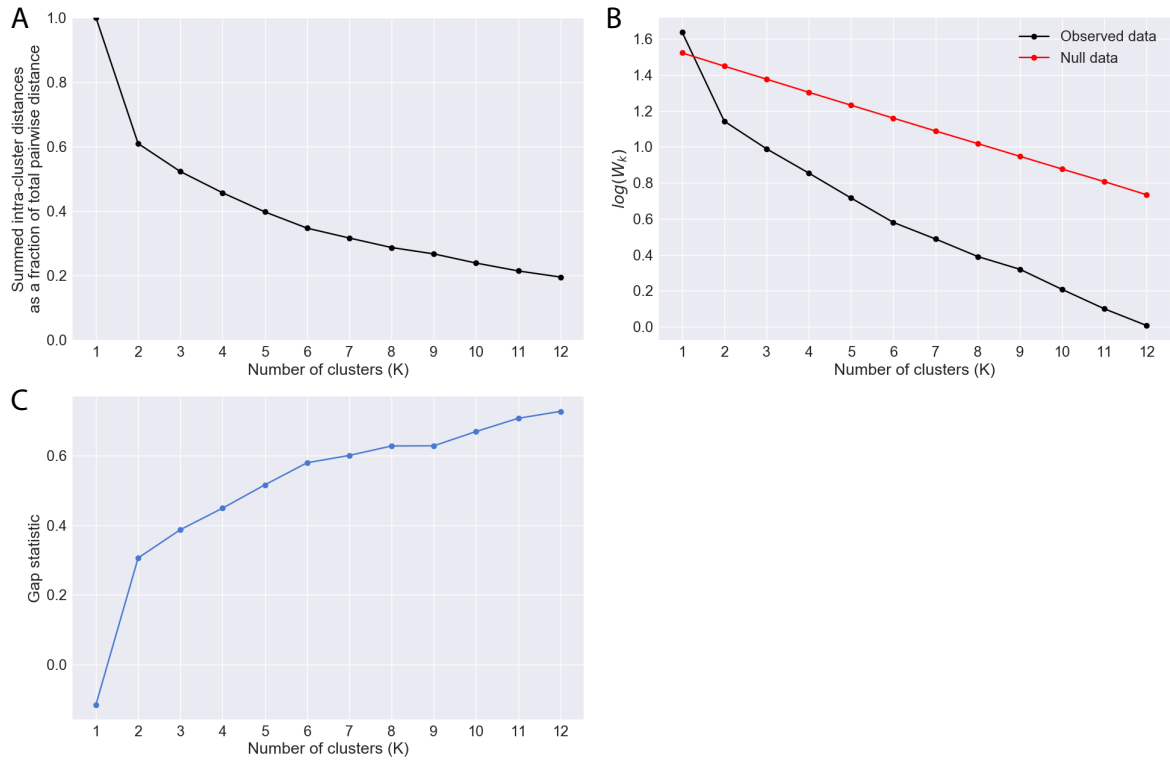

**Figure S6.** Computing the Tibshirani Gap statistic for the FLU09 adjusted plasma cytokine profiles. (A) Summed intra-cluster distances as a fraction of total pairwise distances for each possible  $K$  between 1-12. (B) The log of pooled sum of intra-cluster distances ( $W_k$ ) for each possible  $K$  between 1-12. (C) Gap statistic value for each possible  $K$  between 1-12.



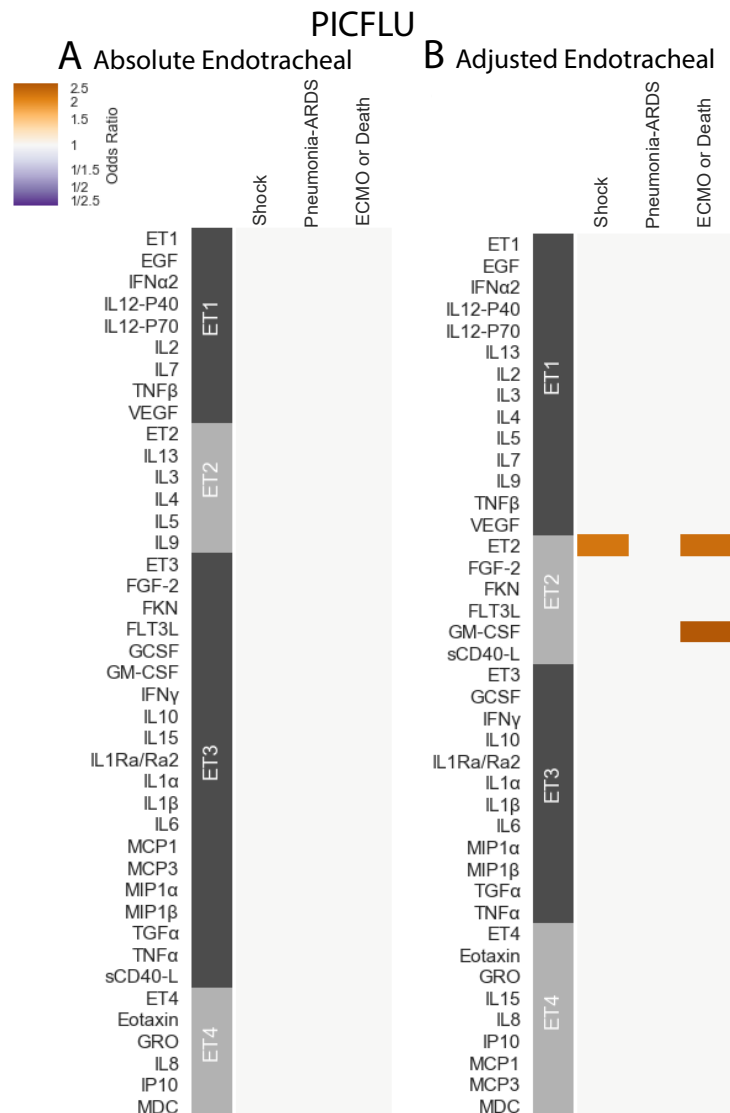

**Figure S7.** PICFLU endotracheal cytokine associations with clinical phenotypes identified using logistic regression while also controlling for patients age and bacterial coinfection. Modules constructed of covarying cytokines (absolute and adjusted measurements separately) from serum samples, were tested for associations with the clinical phenotypes described in Section 2.1: shock, pneumonia-ARDS and ECMO or death. Each cytokine or module is indicated along the rows, grouped by their assigned module. Heatmap color indicates the direction and magnitude of the regression coefficient between cytokine or module level with a given clinical phenotype. Only associations with false-discovery rate (FDR)-adjusted q-value  $\leq 0.2$  are colored. Asterisks indicate family-wise error rate (FWER)-adjusted p-values with \*\*\*, \*\*, and \* indicating  $p \leq 0.0005$ ,  $0.005$ , and  $0.05$ , respectively.

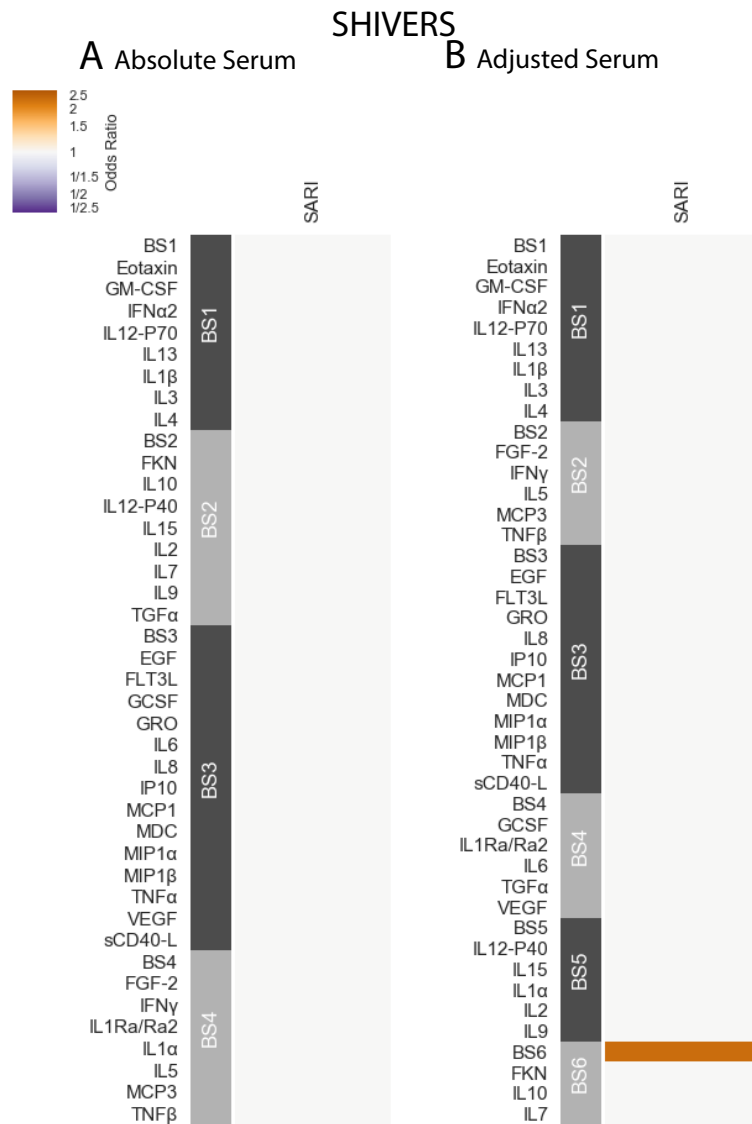

**Figure S8.** SHIVERS serum cytokine associations with phenotypes estimated using linear regression while also controlling for patients age, ethnicity and sampling time. Modules constructed of covarying cytokines (absolute and adjusted measurements separately) from serum samples, were tested for associations with the clinical phenotypes described in Section 2.1. Each cytokine or module is indicated along the rows, grouped by their assigned module. Heatmap color indicates the direction and magnitude of the regression coefficient between cytokine or module level with a given clinical phenotype. Only associations with false-discovery rate (FDR)-adjusted q-value  $\leq 0.2$  are colored. Asterisks indicate family-wise error rate (FWER)-adjusted p-values with \*\*\*, \*\*, and \* indicating  $p \leq 0.0005$ ,  $0.005$ , and  $0.05$ , respectively.

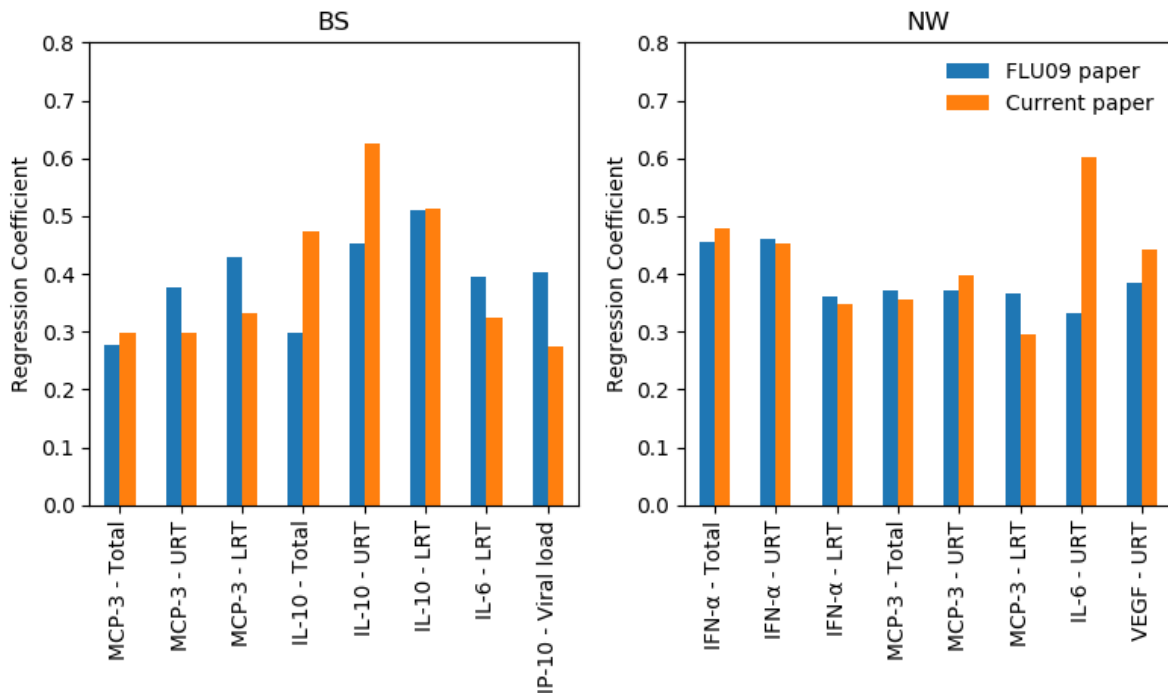

**Figure S9.** A comparison of the regression coefficients of associations of single cytokine measurements with clinical symptom scores that were previously reported to be significantly associated (FDR  $q$ -value  $\leq 0.2$ ) in the FLU09 dataset assessed using data from years 1-2 (Oshansky et al., 2014) and the complete dataset (years 1-5). The FDR  $q$ -values for each cytokine over the full dataset were lower than 0.2.

## 1.2 Tables

Table S1: FLU09 absolute plasma modules and individual cytokine associations with phenotypes

| Outcome  | Module/Analyte | Coef  | P-value  | FWER           | FDR     |
|----------|----------------|-------|----------|----------------|---------|
| Total    | BS3            | 0.529 | 0.000147 | <b>0.00354</b> | 0.00191 |
| Systemic | BS3            | 0.605 | 0.000159 | <b>0.00366</b> | 0.00191 |
| Lower RT | BS4            | 0.322 | 0.00138  | <b>0.0304</b>  | 0.0111  |
| Total    | BS4            | 0.355 | 0.00482  | 0.101          | 0.0289  |
| Upper RT | BS4            | 0.342 | 0.0092   | 0.184          | 0.0367  |
| Upper RT | BS3            | 0.394 | 0.0102   | 0.194          | 0.0367  |
| Lower RT | BS2            | 0.281 | 0.0107   | 0.194          | 0.0367  |
| Systemic | BS4            | 0.334 | 0.0244   | 0.414          | 0.0731  |
| Upper RT | BS2            | 0.3   | 0.0348   | 0.557          | 0.0929  |
| Total    | GRO            | 0.556 | 2.23e-05 | <b>0.00495</b> | 0.00279 |
| Systemic | IP10           | 0.635 | 2.99e-05 | <b>0.0066</b>  | 0.00279 |
| Lower RT | IL10           | 0.513 | 3.78e-05 | <b>0.00831</b> | 0.00279 |
| Total    | IP10           | 0.534 | 6.63e-05 | <b>0.0145</b>  | 0.00368 |
| Upper RT | IL10           | 0.625 | 9.39e-05 | <b>0.0205</b>  | 0.00375 |
| Lower RT | FKN            | 0.369 | 0.000101 | <b>0.022</b>   | 0.00375 |
| Total    | EGF            | 0.524 | 0.000171 | <b>0.037</b>   | 0.00544 |
| Lower RT | MIP1 $\beta$   | 0.353 | 0.000383 | 0.0824         | 0.0106  |
| Upper RT | GRO            | 0.497 | 0.000432 | 0.0925         | 0.0107  |
| Systemic | EGF            | 0.552 | 0.000753 | 0.16           | 0.0167  |
| Lower RT | MCP3           | 0.331 | 0.00103  | 0.218          | 0.0208  |
| Lower RT | IL1 $\alpha$   | 0.369 | 0.00123  | 0.259          | 0.0227  |
| Systemic | GRO            | 0.51  | 0.00142  | 0.299          | 0.0243  |
| Lower RT | IL6            | 0.324 | 0.00178  | 0.373          | 0.0283  |
| Upper RT | TNF $\alpha$   | 0.384 | 0.0022   | 0.458          | 0.0326  |
| Lower RT | GRO            | 0.346 | 0.00246  | 0.509          | 0.0334  |
| Systemic | TGF $\alpha$   | 0.444 | 0.00255  | 0.526          | 0.0334  |
| Upper RT | MIP1 $\beta$   | 0.386 | 0.00294  | 0.603          | 0.0354  |
| log-VL   | IP10           | 0.275 | 0.00303  | 0.618          | 0.0354  |
| Total    | IL1 $\alpha$   | 0.414 | 0.00367  | 0.746          | 0.0391  |
| Total    | IL10           | 0.474 | 0.0037   | 0.748          | 0.0391  |
| Total    | IL6            | 0.368 | 0.00435  | 0.875          | 0.0422  |
| Systemic | MCP1           | 0.47  | 0.00437  | 0.875          | 0.0422  |
| Lower RT | GM-CSF         | 0.294 | 0.00562  | 1              | 0.052   |
| Upper RT | FKN            | 0.351 | 0.00614  | 1              | 0.0542  |
| Total    | MIP1 $\beta$   | 0.347 | 0.00634  | 1              | 0.0542  |
| Lower RT | TNF $\alpha$   | 0.272 | 0.00664  | 1              | 0.0546  |
| Total    | TNF $\alpha$   | 0.329 | 0.00772  | 1              | 0.0612  |
| Systemic | IL8            | 0.344 | 0.00818  | 1              | 0.0626  |
| Systemic | Eotaxin        | 0.372 | 0.00856  | 1              | 0.0634  |
| Total    | IL8            | 0.297 | 0.00889  | 1              | 0.0636  |
| Upper RT | GCSF           | 0.409 | 0.00944  | 1              | 0.0639  |
| Total    | FKN            | 0.323 | 0.0095   | 1              | 0.0639  |
| Systemic | IL6            | 0.386 | 0.0102   | 1              | 0.0666  |
| Lower RT | EGF            | 0.304 | 0.0119   | 1              | 0.0754  |
| Upper RT | IP10           | 0.371 | 0.0132   | 1              | 0.0814  |
| Upper RT | IL6            | 0.334 | 0.014    | 1              | 0.0841  |
| Lower RT | FGF-2          | 0.246 | 0.0156   | 1              | 0.0897  |
| Upper RT | EGF            | 0.372 | 0.0158   | 1              | 0.0897  |

Continued on next page

Table S1: FLU09 absolute plasma modules and individual cytokine associations with phenotypes

| Outcome  | Module/Analyte | Coef  | P-value | FWER | FDR    |
|----------|----------------|-------|---------|------|--------|
| Lower RT | GCSF           | 0.299 | 0.0172  | 1    | 0.0952 |
| Total    | IFN $\alpha$ 2 | 0.317 | 0.0197  | 1    | 0.104  |
| Upper RT | IL1 $\alpha$   | 0.35  | 0.0206  | 1    | 0.104  |
| Total    | MCP1           | 0.34  | 0.0208  | 1    | 0.104  |
| Lower RT | IL12-P70       | 0.239 | 0.0211  | 1    | 0.104  |
| Total    | TGF $\alpha$   | 0.304 | 0.0214  | 1    | 0.104  |
| Total    | MCP3           | 0.298 | 0.0219  | 1    | 0.104  |
| Upper RT | IFN $\alpha$ 2 | 0.322 | 0.022   | 1    | 0.104  |
| Total    | Eotaxin        | 0.279 | 0.0255  | 1    | 0.118  |
| Upper RT | MCP3           | 0.298 | 0.0267  | 1    | 0.121  |
| Systemic | IL1 $\alpha$   | 0.367 | 0.0302  | 1    | 0.134  |
| log-VL   | GRO            | 0.204 | 0.0327  | 1    | 0.14   |
| Lower RT | IFN $\alpha$ 2 | 0.238 | 0.0328  | 1    | 0.14   |
| Lower RT | IP10           | 0.253 | 0.0339  | 1    | 0.142  |
| Total    | sCD40-L        | 0.312 | 0.0379  | 1    | 0.154  |
| Total    | GCSF           | 0.323 | 0.038   | 1    | 0.154  |
| Upper RT | IL8            | 0.243 | 0.0428  | 1    | 0.17   |

Table S2: FLU09 adjusted plasma modules and individual cytokine associations with phenotypes

| Outcome          | Module/Analyte | Coef   | P-value  | FWER           | FDR     |
|------------------|----------------|--------|----------|----------------|---------|
| Total            | BS1            | -0.557 | 3.15e-05 | <b>0.00114</b> | 0.00114 |
| Systemic         | BS1            | -0.582 | 0.000229 | <b>0.00803</b> | 0.00413 |
| Lower RT         | BS1            | -0.35  | 0.00252  | 0.0858         | 0.0281  |
| Systemic         | BS3            | 0.461  | 0.00312  | 0.103          | 0.0281  |
| Upper RT         | BS1            | -0.42  | 0.00468  | 0.15           | 0.0337  |
| Total            | BS3            | 0.348  | 0.0121   | 0.376          | 0.0729  |
| Lower RT         | BS4            | 0.252  | 0.0146   | 0.439          | 0.0752  |
| Systemic         | IL9            | -0.634 | 0.000428 | 0.0949         | 0.0491  |
| Lower RT         | IL4            | -0.319 | 0.000847 | 0.187          | 0.0491  |
| Systemic         | IP10           | 0.512  | 0.000889 | 0.196          | 0.0491  |
| Total            | IL7            | -0.449 | 0.00111  | 0.242          | 0.0491  |
| Total            | IL9            | -0.512 | 0.00131  | 0.286          | 0.0491  |
| Total            | IL4            | -0.377 | 0.00145  | 0.314          | 0.0491  |
| Upper RT         | IL4            | -0.387 | 0.00159  | 0.344          | 0.0491  |
| Total            | IL1 $\beta$    | -0.526 | 0.00177  | 0.381          | 0.0491  |
| Systemic         | IL7            | -0.495 | 0.0021   | 0.45           | 0.0519  |
| Total            | GRO            | 0.425  | 0.00235  | 0.501          | 0.0522  |
| Lower RT         | FKN            | 0.282  | 0.00286  | 0.606          | 0.0577  |
| Systemic         | IL5            | -0.459 | 0.0032   | 0.675          | 0.0592  |
| Total            | IP10           | 0.399  | 0.00357  | 0.75           | 0.0606  |
| Systemic         | EGF            | 0.556  | 0.00382  | 0.798          | 0.0606  |
| Systemic         | IL1 $\beta$    | -0.562 | 0.00411  | 0.855          | 0.0608  |
| Total            | EGF            | 0.475  | 0.00466  | 0.965          | 0.0646  |
| Gastrointestinal | EGF            | 0.51   | 0.00498  | 1              | 0.0651  |

Continued on next page

Table S2: FLU09 adjusted plasma modules and individual cytokine associations with phenotypes

| Outcome          | Module/Analyte | Coef   | P-value | FWER | FDR    |
|------------------|----------------|--------|---------|------|--------|
| Total            | IL5            | -0.378 | 0.00569 | 1    | 0.0693 |
| log-VL           | IP10           | 0.25   | 0.00593 | 1    | 0.0693 |
| Systemic         | TNF $\beta$    | -0.421 | 0.00777 | 1    | 0.0828 |
| Total            | TNF $\beta$    | -0.366 | 0.00784 | 1    | 0.0828 |
| Lower RT         | IL7            | -0.303 | 0.00879 | 1    | 0.0887 |
| Lower RT         | IL10           | 0.357  | 0.0141  | 1    | 0.133  |
| Upper RT         | IL10           | 0.449  | 0.015   | 1    | 0.133  |
| Systemic         | TGF $\alpha$   | 0.375  | 0.0153  | 1    | 0.133  |
| Lower RT         | MIP1 $\beta$   | 0.257  | 0.0155  | 1    | 0.133  |
| Gastrointestinal | GRO            | 0.366  | 0.0167  | 1    | 0.135  |
| Total            | IL13           | -0.369 | 0.0183  | 1    | 0.135  |
| Systemic         | GRO            | 0.391  | 0.0184  | 1    | 0.135  |
| Upper RT         | GRO            | 0.35   | 0.0188  | 1    | 0.135  |
| Lower RT         | IL9            | -0.317 | 0.0189  | 1    | 0.135  |
| Lower RT         | MCP3           | 0.257  | 0.0212  | 1    | 0.147  |
| Lower RT         | IL1 $\beta$    | -0.32  | 0.0247  | 1    | 0.166  |
| Systemic         | IL13           | -0.394 | 0.0295  | 1    | 0.192  |
| Systemic         | IL4            | -0.309 | 0.0303  | 1    | 0.192  |
| Systemic         | MCP1           | 0.344  | 0.0324  | 1    | 0.2    |
| Systemic         | Eotaxin        | 0.309  | 0.0338  | 1    | 0.203  |
| log-VL           | IL12-P40       | -0.199 | 0.0371  | 1    | 0.217  |
| Upper RT         | IL1 $\beta$    | -0.368 | 0.0441  | 1    | 0.245  |
| Systemic         | IL8            | 0.264  | 0.0441  | 1    | 0.245  |
| Upper RT         | IL7            | -0.298 | 0.0479  | 1    | 0.259  |

Table S3: FLU09 absolute nasal wash modules and individual cytokine associations with phenotypes

| Outcome          | Module/Analyte | Coef  | P-value  | FWER           | FDR     |
|------------------|----------------|-------|----------|----------------|---------|
| Upper RT         | NW2            | 0.46  | 0.00162  | <b>0.0292</b>  | 0.0292  |
| log-VL           | NW3            | 0.202 | 0.00486  | 0.0827         | 0.0438  |
| Total            | NW2            | 0.394 | 0.00844  | 0.135          | 0.0507  |
| Lower RT         | NW2            | 0.266 | 0.0479   | 0.718          | 0.173   |
| Gastrointestinal | NW2            | 0.336 | 0.0479   | 0.718          | 0.173   |
| Upper RT         | IL6            | 0.601 | 2.36e-05 | <b>0.00523</b> | 0.00523 |
| Upper RT         | IL10           | 0.436 | 0.00026  | 0.0575         | 0.0244  |
| Total            | IFN $\alpha$ 2 | 0.479 | 0.00033  | 0.0727         | 0.0244  |
| Total            | IL6            | 0.517 | 0.000609 | 0.133          | 0.0279  |
| Upper RT         | IFN $\alpha$ 2 | 0.453 | 0.000629 | 0.137          | 0.0279  |
| Upper RT         | MIP1 $\beta$   | 0.51  | 0.00126  | 0.274          | 0.0418  |
| Total            | IL10           | 0.39  | 0.00148  | 0.319          | 0.0418  |
| Upper RT         | VEGF           | 0.441 | 0.00151  | 0.324          | 0.0418  |
| log-VL           | TNF $\beta$    | 0.216 | 0.00247  | 0.529          | 0.061   |
| Upper RT         | GCSF           | 0.447 | 0.00281  | 0.598          | 0.0623  |
| Lower RT         | IL6            | 0.388 | 0.00356  | 0.755          | 0.0719  |
| Upper RT         | IL1 $\alpha$   | 0.365 | 0.00433  | 0.914          | 0.0734  |

Continued on next page

Table S3: FLU09 absolute nasal wash modules and individual cytokine associations with phenotypes

| Outcome          | Module/Analyte | Coef   | P-value | FWER  | FDR    |
|------------------|----------------|--------|---------|-------|--------|
| Lower RT         | IL10           | 0.311  | 0.00449 | 0.944 | 0.0734 |
| Total            | FLT3L          | 0.342  | 0.00463 | 0.967 | 0.0734 |
| Lower RT         | IFN $\alpha$ 2 | 0.349  | 0.00568 | 1     | 0.0802 |
| Upper RT         | FGF-2          | 0.433  | 0.00591 | 1     | 0.0802 |
| Upper RT         | FLT3L          | 0.329  | 0.00614 | 1     | 0.0802 |
| Total            | IL1 $\alpha$   | 0.35   | 0.00693 | 1     | 0.0854 |
| Upper RT         | MCP3           | 0.397  | 0.00731 | 1     | 0.0854 |
| log-VL           | IL5            | 0.186  | 0.00843 | 1     | 0.0914 |
| Total            | IFN $\gamma$   | 0.331  | 0.00896 | 1     | 0.0914 |
| Upper RT         | IFN $\gamma$   | 0.327  | 0.00905 | 1     | 0.0914 |
| Upper RT         | Eotaxin        | 0.354  | 0.00963 | 1     | 0.093  |
| Lower RT         | MIP1 $\beta$   | 0.37   | 0.0101  | 1     | 0.0933 |
| Upper RT         | FKN            | 0.317  | 0.0119  | 1     | 0.105  |
| Upper RT         | IL1 $\beta$    | 0.342  | 0.0132  | 1     | 0.105  |
| Upper RT         | MDC            | 0.322  | 0.0134  | 1     | 0.105  |
| Lower RT         | GCSF           | 0.333  | 0.0138  | 1     | 0.105  |
| Systemic         | IFN $\alpha$ 2 | 0.367  | 0.0145  | 1     | 0.105  |
| Total            | MDC            | 0.321  | 0.0145  | 1     | 0.105  |
| Total            | MIP1 $\beta$   | 0.4    | 0.0146  | 1     | 0.105  |
| Systemic         | FLT3L          | 0.313  | 0.0154  | 1     | 0.107  |
| log-VL           | IL2            | 0.179  | 0.0165  | 1     | 0.111  |
| Total            | MCP3           | 0.355  | 0.0185  | 1     | 0.121  |
| Systemic         | IFN $\gamma$   | 0.315  | 0.0193  | 1     | 0.123  |
| Gastrointestinal | MDC            | 0.329  | 0.023   | 1     | 0.129  |
| Systemic         | IL10           | 0.303  | 0.0232  | 1     | 0.129  |
| Total            | GCSF           | 0.35   | 0.0238  | 1     | 0.129  |
| Upper RT         | TNF $\alpha$   | 0.346  | 0.0239  | 1     | 0.129  |
| Gastrointestinal | Eotaxin        | 0.341  | 0.0246  | 1     | 0.129  |
| log-VL           | EGF            | -0.171 | 0.0269  | 1     | 0.129  |
| Lower RT         | MCP3           | 0.295  | 0.0272  | 1     | 0.129  |
| Upper RT         | IL12-P40       | 0.259  | 0.0275  | 1     | 0.129  |
| Upper RT         | MCP1           | 0.31   | 0.0275  | 1     | 0.129  |
| Total            | FGF-2          | 0.356  | 0.0276  | 1     | 0.129  |
| Upper RT         | IL8            | 0.321  | 0.0277  | 1     | 0.129  |
| Gastrointestinal | IFN $\alpha$ 2 | 0.342  | 0.0283  | 1     | 0.129  |
| Gastrointestinal | IL12-P40       | 0.291  | 0.0283  | 1     | 0.129  |
| log-VL           | TNF $\alpha$   | 0.196  | 0.0285  | 1     | 0.129  |
| Total            | FKN            | 0.279  | 0.0294  | 1     | 0.131  |
| Systemic         | IL15           | 0.267  | 0.0303  | 1     | 0.132  |
| Lower RT         | IL1 $\alpha$   | 0.251  | 0.0311  | 1     | 0.133  |
| Total            | IL15           | 0.248  | 0.033   | 1     | 0.136  |
| Total            | IL12-P40       | 0.254  | 0.0331  | 1     | 0.136  |
| log-VL           | IL6            | 0.191  | 0.0373  | 1     | 0.15   |
| Total            | IP10           | 0.284  | 0.0378  | 1     | 0.15   |
| log-VL           | GM-CSF         | 0.179  | 0.0386  | 1     | 0.15   |
| Gastrointestinal | IL6            | 0.361  | 0.0396  | 1     | 0.152  |
| Upper RT         | IL12-P70       | 0.249  | 0.0427  | 1     | 0.16   |
| Total            | VEGF           | 0.293  | 0.0432  | 1     | 0.16   |
| Total            | Eotaxin        | 0.28   | 0.0455  | 1     | 0.162  |

Continued on next page

Table S3: FLU09 absolute nasal wash modules and individual cytokine associations with phenotypes

| Outcome  | Module/Analyte | Coef  | P-value | FWER | FDR   |
|----------|----------------|-------|---------|------|-------|
| log-VL   | IFN $\alpha$ 2 | 0.176 | 0.0458  | 1    | 0.162 |
| Total    | MCP1           | 0.288 | 0.0459  | 1    | 0.162 |
| Upper RT | IP10           | 0.269 | 0.0472  | 1    | 0.162 |
| Upper RT | IL1Ra/Ra2      | 0.299 | 0.0474  | 1    | 0.162 |
| Systemic | FKN            | 0.269 | 0.048   | 1    | 0.162 |

Table S4: FLU09 adjusted nasal wash modules and individual cytokine associations with phenotypes

| Outcome  | Module/Analyte | Coef   | P-value  | FWER          | FDR    |
|----------|----------------|--------|----------|---------------|--------|
| log-VL   | NW6            | -0.211 | 0.00393  | 0.141         | 0.141  |
| Systemic | NW2            | 0.282  | 0.0107   | 0.375         | 0.193  |
| Total    | NW2            | 0.247  | 0.0189   | 0.642         | 0.226  |
| Upper RT | NW2            | 0.206  | 0.0499   | 1             | 0.449  |
| log-VL   | EGF            | -0.281 | 7.07e-05 | <b>0.0157</b> | 0.0157 |
| log-VL   | IL1Ra/Ra2      | -0.215 | 0.00313  | 0.692         | 0.248  |
| log-VL   | Eotaxin        | -0.21  | 0.00335  | 0.737         | 0.248  |
| Systemic | FLT3L          | 0.342  | 0.00481  | 1             | 0.267  |
| log-VL   | TNF $\beta$    | 0.194  | 0.00651  | 1             | 0.289  |
| log-VL   | MDC            | -0.184 | 0.00988  | 1             | 0.365  |
| log-VL   | FGF-2          | -0.18  | 0.0155   | 1             | 0.402  |
| log-VL   | IL5            | 0.171  | 0.0169   | 1             | 0.402  |
| Lower RT | GM-CSF         | -0.241 | 0.0172   | 1             | 0.402  |
| Upper RT | IL6            | 0.27   | 0.0195   | 1             | 0.402  |
| Upper RT | IL10           | 0.249  | 0.0199   | 1             | 0.402  |
| Lower RT | IL7            | -0.243 | 0.0251   | 1             | 0.464  |
| Total    | IL10           | 0.231  | 0.033    | 1             | 0.472  |
| Total    | FLT3L          | 0.244  | 0.0372   | 1             | 0.472  |
| Total    | IFN $\alpha$ 2 | 0.209  | 0.039    | 1             | 0.472  |
| Systemic | TGF $\alpha$   | -0.266 | 0.0401   | 1             | 0.472  |
| Lower RT | IL10           | 0.197  | 0.0403   | 1             | 0.472  |
| Systemic | IFN $\gamma$   | 0.24   | 0.0419   | 1             | 0.472  |
| Total    | IL5            | -0.246 | 0.0426   | 1             | 0.472  |
| log-VL   | IL1 $\alpha$   | -0.147 | 0.0448   | 1             | 0.472  |
| Upper RT | IL4            | -0.221 | 0.0458   | 1             | 0.472  |
| Systemic | IL10           | 0.229  | 0.0468   | 1             | 0.472  |

Table S5: PICFLU absolute serum modules and individual cytokine associations with phenotypes

| Outcome        | Module/Analyte | Odds Ratio | P-value  | FWER            | FDR      |
|----------------|----------------|------------|----------|-----------------|----------|
| Shock          | BS3            | 2.75       | 1.62e-06 | <b>2.43e-05</b> | 2.43e-05 |
| ECMO or Death  | BS3            | 2.04       | 0.00204  | <b>0.0286</b>   | 0.0153   |
| Pneumonia-ARDS | BS3            | 1.61       | 0.00693  | 0.0901          | 0.0347   |

Continued on next page



Table S5: PICFLU absolute serum modules and individual cytokine associations with phenotypes

| Outcome        | Module/Analyte | Odds Ratio | P-value  | FWER            | FDR      |
|----------------|----------------|------------|----------|-----------------|----------|
| ECMO or Death  | BS4            | 0.643      | 0.0286   | 0.343           | 0.107    |
| Shock          | MCP1           | 2.62       | 4.35e-07 | <b>4.83e-05</b> | 4.83e-05 |
| Shock          | IL6            | 2.12       | 5.18e-05 | <b>0.0057</b>   | 0.00288  |
| Shock          | IL8            | 2.37       | 8.84e-05 | <b>0.00964</b>  | 0.00314  |
| Shock          | IP10           | 1.95       | 0.000113 | <b>0.0122</b>   | 0.00314  |
| Pneumonia-ARDS | MCP1           | 1.85       | 0.000283 | <b>0.0303</b>   | 0.00625  |
| Pneumonia-ARDS | IL8            | 2.17       | 0.000338 | <b>0.0358</b>   | 0.00625  |
| ECMO or Death  | MIP1 $\alpha$  | 1.97       | 0.000766 | 0.0804          | 0.0113   |
| ECMO or Death  | IL8            | 2.95       | 0.000818 | 0.0851          | 0.0113   |
| ECMO or Death  | IL6            | 2.45       | 0.00128  | 0.132           | 0.0158   |
| Shock          | IL10           | 1.69       | 0.0015   | 0.153           | 0.0167   |
| Shock          | TNF $\alpha$   | 1.66       | 0.0026   | 0.263           | 0.0256   |
| ECMO or Death  | MCP1           | 1.98       | 0.00276  | 0.276           | 0.0256   |
| Shock          | GCSF           | 1.61       | 0.00489  | 0.484           | 0.0418   |
| ECMO or Death  | EGF            | 0.437      | 0.00608  | 0.596           | 0.0479   |
| ECMO or Death  | MDC            | 0.545      | 0.00683  | 0.662           | 0.0479   |
| ECMO or Death  | sCD40-L        | 0.549      | 0.00691  | 0.663           | 0.0479   |
| ECMO or Death  | IL10           | 1.75       | 0.0113   | 1               | 0.0738   |
| Pneumonia-ARDS | FGF-2          | 0.65       | 0.0141   | 1               | 0.0872   |
| ECMO or Death  | FKN            | 1.69       | 0.0179   | 1               | 0.105    |
| Shock          | MIP1 $\alpha$  | 1.43       | 0.02     | 1               | 0.111    |
| Pneumonia-ARDS | IL10           | 1.44       | 0.0218   | 1               | 0.112    |
| ECMO or Death  | IL1 $\beta$    | 1.61       | 0.0225   | 1               | 0.112    |
| Pneumonia-ARDS | IL6            | 1.47       | 0.0232   | 1               | 0.112    |
| ECMO or Death  | IL12-P40       | 1.6        | 0.03     | 1               | 0.139    |
| Pneumonia-ARDS | MDC            | 0.709      | 0.0354   | 1               | 0.157    |
| Shock          | EGF            | 0.694      | 0.037    | 1               | 0.158    |
| ECMO or Death  | IL15           | 1.8        | 0.0416   | 1               | 0.161    |
| ECMO or Death  | IL1Ra/Ra2      | 1.6        | 0.044    | 1               | 0.161    |
| Shock          | IL12-P70       | 0.735      | 0.0452   | 1               | 0.161    |
| Pneumonia-ARDS | MIP1 $\alpha$  | 1.36       | 0.0461   | 1               | 0.161    |
| Shock          | sCD40-L        | 0.745      | 0.0463   | 1               | 0.161    |
| ECMO or Death  | TNF $\alpha$   | 1.6        | 0.0463   | 1               | 0.161    |

Table S6: PICFLU adjusted serum modules and individual cytokine associations with phenotypes

| Outcome        | Module/Analyte | Odds Ratio | P-value  | FWER            | FDR      |
|----------------|----------------|------------|----------|-----------------|----------|
| Shock          | BS3            | 3.01       | 1.73e-07 | <b>2.08e-06</b> | 2.08e-06 |
| Shock          | BS4            | 0.463      | 1.97e-05 | <b>0.000217</b> | 0.000118 |
| ECMO or Death  | BS3            | 2.46       | 0.000426 | <b>0.00426</b>  | 0.00171  |
| Pneumonia-ARDS | BS3            | 1.75       | 0.00106  | <b>0.00957</b>  | 0.00319  |
| Pneumonia-ARDS | BS4            | 0.598      | 0.00194  | <b>0.0155</b>   | 0.00465  |
| ECMO or Death  | BS4            | 0.494      | 0.00404  | <b>0.0283</b>   | 0.00808  |
| ECMO or Death  | BS2            | 0.586      | 0.0123   | 0.0738          | 0.0211   |
| Shock          | MCP1           | 2.7        | 1.31e-07 | <b>1.45e-05</b> | 1.45e-05 |

Continued on next page

Table S6: PICFLU adjusted serum modules and individual cytokine associations with phenotypes

| Outcome        | Module/Analyte | Odds Ratio | P-value  | FWER           | FDR      |
|----------------|----------------|------------|----------|----------------|----------|
| Shock          | IL6            | 2.18       | 1.27e-05 | <b>0.00139</b> | 0.000703 |
| Pneumonia-ARDS | MCP1           | 1.95       | 6.1e-05  | <b>0.00665</b> | 0.00226  |
| Shock          | IL8            | 2.16       | 0.000136 | <b>0.0147</b>  | 0.00368  |
| Pneumonia-ARDS | IL8            | 2.21       | 0.000166 | <b>0.0177</b>  | 0.00368  |
| Shock          | IP10           | 1.86       | 0.00022  | <b>0.0234</b>  | 0.00408  |
| ECMO or Death  | EGF            | 0.211      | 0.000409 | <b>0.043</b>   | 0.00649  |
| Shock          | IL12-P70       | 0.565      | 0.000491 | 0.0511         | 0.00682  |
| ECMO or Death  | IL8            | 3.41       | 0.000623 | 0.0641         | 0.00768  |
| ECMO or Death  | MIP1 $\alpha$  | 1.99       | 0.000818 | 0.0834         | 0.00908  |
| ECMO or Death  | IL6            | 2.52       | 0.00112  | 0.113          | 0.0113   |
| Shock          | TNF $\alpha$   | 1.7        | 0.00122  | 0.122          | 0.0113   |
| ECMO or Death  | MDC            | 0.443      | 0.00187  | 0.185          | 0.0151   |
| Shock          | IL10           | 1.6        | 0.00191  | 0.187          | 0.0151   |
| ECMO or Death  | sCD40-L        | 0.511      | 0.00271  | 0.263          | 0.02     |
| ECMO or Death  | MCP1           | 2.06       | 0.00423  | 0.406          | 0.0293   |
| Shock          | IL7            | 0.65       | 0.00452  | 0.429          | 0.0295   |
| Pneumonia-ARDS | FGF-2          | 0.598      | 0.00499  | 0.469          | 0.0308   |
| ECMO or Death  | IFN $\gamma$   | 0.512      | 0.00603  | 0.561          | 0.0352   |
| Pneumonia-ARDS | IL6            | 1.53       | 0.00859  | 0.79           | 0.0449   |
| Shock          | EGF            | 0.616      | 0.00893  | 0.813          | 0.0449   |
| ECMO or Death  | VEGF           | 0.502      | 0.00906  | 0.815          | 0.0449   |
| Shock          | GCSF           | 1.52       | 0.0093   | 0.828          | 0.0449   |
| Pneumonia-ARDS | IL10           | 1.45       | 0.0136   | 1              | 0.062    |
| Shock          | FGF-2          | 0.646      | 0.014    | 1              | 0.062    |
| Pneumonia-ARDS | IL2            | 0.688      | 0.0166   | 1              | 0.0707   |
| Pneumonia-ARDS | MDC            | 0.664      | 0.0185   | 1              | 0.0761   |
| ECMO or Death  | IL10           | 1.72       | 0.0216   | 1              | 0.0856   |
| Shock          | GRO            | 0.713      | 0.0229   | 1              | 0.0877   |
| Shock          | IFN $\alpha$ 2 | 0.714      | 0.0271   | 1              | 0.0983   |
| Shock          | sCD40-L        | 0.718      | 0.0274   | 1              | 0.0983   |
| Pneumonia-ARDS | IFN $\alpha$ 2 | 0.717      | 0.0305   | 1              | 0.105    |
| ECMO or Death  | IL15           | 1.97       | 0.0313   | 1              | 0.105    |
| Shock          | TGF $\alpha$   | 0.694      | 0.0345   | 1              | 0.111    |
| Pneumonia-ARDS | MIP1 $\alpha$  | 1.37       | 0.0351   | 1              | 0.111    |
| ECMO or Death  | FKN            | 1.59       | 0.0359   | 1              | 0.111    |
| Shock          | MIP1 $\alpha$  | 1.37       | 0.0378   | 1              | 0.113    |
| ECMO or Death  | IL1 $\beta$    | 1.55       | 0.0485   | 1              | 0.142    |

Table S7: PICFLU absolute endotracheal aspirate modules and individual cytokine associations with phenotypes

| Outcome       | Module/Analyte | Odds Ratio | P-value | FWER  | FDR   |
|---------------|----------------|------------|---------|-------|-------|
| Shock         | FLT3L          | 2.52       | 0.00328 | 0.364 | 0.26  |
| Shock         | FGF-2          | 2.4        | 0.00469 | 0.516 | 0.26  |
| ECMO or Death | GM-CSF         | 2.78       | 0.0075  | 0.818 | 0.272 |
| Shock         | sCD40-L        | 2.12       | 0.0112  | 1     | 0.272 |
| ECMO or Death | EGF            | 0.418      | 0.0123  | 1     | 0.272 |

Continued on next page

Table S7: PICFLU absolute endotracheal aspirate modules and individual cytokine associations with phenotypes

| Outcome        | Module/Analyte | Odds Ratio | P-value | FWER | FDR   |
|----------------|----------------|------------|---------|------|-------|
| Shock          | GM-CSF         | 2.46       | 0.0168  | 1    | 0.31  |
| Shock          | IL12-P40       | 1.8        | 0.0283  | 1    | 0.449 |
| Pneumonia-ARDS | TNF $\alpha$   | 0.583      | 0.0428  | 1    | 0.488 |

Table S8: PICFLU adjusted endotracheal aspirate modules and individual cytokine associations with phenotypes

| Outcome        | Module/Analyte | Odds Ratio | P-value | FWER   | FDR   |
|----------------|----------------|------------|---------|--------|-------|
| Shock          | ET2            | 2.27       | 0.00596 | 0.0715 | 0.05  |
| ECMO or Death  | ET2            | 2.38       | 0.00833 | 0.0916 | 0.05  |
| ECMO or Death  | GM-CSF         | 3.02       | 0.0015  | 0.166  | 0.166 |
| ECMO or Death  | EGF            | 0.386      | 0.00849 | 0.934  | 0.315 |
| Shock          | FLT3L          | 2.15       | 0.0108  | 1      | 0.315 |
| Shock          | FGF-2          | 2.01       | 0.0113  | 1      | 0.315 |
| Pneumonia-ARDS | TGF $\alpha$   | 0.484      | 0.0146  | 1      | 0.325 |
| Shock          | IL5            | 0.545      | 0.0303  | 1      | 0.358 |
| Shock          | IL10           | 0.578      | 0.0313  | 1      | 0.358 |
| Pneumonia-ARDS | TNF $\alpha$   | 0.572      | 0.0317  | 1      | 0.358 |
| ECMO or Death  | IL1Ra/Ra2      | 0.426      | 0.033   | 1      | 0.358 |
| Shock          | sCD40-L        | 1.82       | 0.0381  | 1      | 0.358 |

Table S9: SHIVERS absolute serum modules and individual cytokine associations with phenotypes

| Outcome | Module/Analyte | Odds Ratio | P-value | FWER | FDR   |
|---------|----------------|------------|---------|------|-------|
| SARI    | MDC            | 0.367      | 0.0288  | 1    | 0.707 |

Table S10: SHIVERS adjusted serum modules and individual cytokine associations with phenotypes

| Outcome | Module/Analyte | Odds Ratio | P-value | FWER  | FDR   |
|---------|----------------|------------|---------|-------|-------|
| SARI    | BS6            | 2.4        | 0.028   | 0.168 | 0.168 |
| SARI    | GRO            | 2.96       | 0.0249  | 0.921 | 0.337 |
| SARI    | FKN            | 2.47       | 0.0312  | 1     | 0.337 |
| SARI    | IL12-P40       | 0.402      | 0.0345  | 1     | 0.337 |
| SARI    | MDC            | 0.413      | 0.0364  | 1     | 0.337 |
| SARI    | VEGF           | 5.67       | 0.0476  | 1     | 0.348 |

Table S11: FLU09 absolute plasma cores and individual cytokine associations with phenotypes

| Outcome  | Core  | Coef  | P-value  | FWER          | FDR    |
|----------|-------|-------|----------|---------------|--------|
| Systemic | Core5 | 0.6   | 0.000131 | <b>0.0055</b> | 0.0055 |
| Total    | Core5 | 0.475 | 0.000685 | <b>0.0281</b> | 0.0102 |
| Lower RT | Core4 | 0.328 | 0.000836 | <b>0.0334</b> | 0.0102 |
| Total    | Core1 | 0.522 | 0.00116  | <b>0.0452</b> | 0.0102 |
| Upper RT | Core4 | 0.406 | 0.00121  | <b>0.046</b>  | 0.0102 |
| Total    | Core6 | 0.368 | 0.00378  | 0.14          | 0.0235 |
| Total    | Core4 | 0.356 | 0.00392  | 0.141         | 0.0235 |
| Systemic | Core1 | 0.532 | 0.00475  | 0.166         | 0.0249 |
| Systemic | Core6 | 0.393 | 0.00775  | 0.263         | 0.0362 |
| Upper RT | Core6 | 0.346 | 0.00934  | 0.308         | 0.0392 |
| Lower RT | Core6 | 0.266 | 0.0115   | 0.369         | 0.044  |
| Upper RT | Core1 | 0.416 | 0.016    | 0.495         | 0.0559 |
| Upper RT | Core5 | 0.335 | 0.0285   | 0.856         | 0.0921 |
| log-VL   | Core5 | 0.197 | 0.0395   | 1             | 0.119  |

Table S12: FLU09 adjusted plasma cores and individual cytokine associations with phenotypes

| Outcome          | Core  | Coef   | P-value | FWER   | FDR    |
|------------------|-------|--------|---------|--------|--------|
| Total            | Core3 | -0.412 | 0.00262 | 0.0944 | 0.0944 |
| Systemic         | Core3 | -0.409 | 0.0112  | 0.391  | 0.142  |
| Gastrointestinal | Core1 | 0.386  | 0.0168  | 0.57   | 0.142  |
| Systemic         | Core5 | 0.328  | 0.0208  | 0.688  | 0.142  |
| Lower RT         | Core4 | 0.227  | 0.0219  | 0.701  | 0.142  |
| Upper RT         | Core3 | -0.332 | 0.0236  | 0.731  | 0.142  |
| Lower RT         | Core3 | -0.245 | 0.0345  | 1      | 0.178  |
| Lower RT         | Core6 | 0.243  | 0.0489  | 1      | 0.22   |

Table S13: PICFLU absolute serum cores and individual cytokine associations with phenotypes

| Outcome        | Core  | Coef  | P-value  | FWER            | FDR      |
|----------------|-------|-------|----------|-----------------|----------|
| Shock          | Core5 | 2.62  | 5.26e-07 | <b>1.11e-05</b> | 1.11e-05 |
| Shock          | Core6 | 2.31  | 2.33e-05 | <b>0.000466</b> | 0.000245 |
| ECMO or Death  | Core6 | 2.18  | 0.00104  | <b>0.0197</b>   | 0.00727  |
| Pneumonia-ARDS | Core5 | 1.52  | 0.0105   | 0.189           | 0.0467   |
| Pneumonia-ARDS | Core6 | 1.57  | 0.0111   | 0.189           | 0.0467   |
| ECMO or Death  | Core5 | 1.71  | 0.0184   | 0.294           | 0.0643   |
| ECMO or Death  | Core2 | 1.6   | 0.0256   | 0.383           | 0.0749   |
| ECMO or Death  | Core1 | 0.643 | 0.0286   | 0.4             | 0.0749   |

Table S14: PICFLU adjusted serum cores and individual cytokine associations with phenotypes

| Outcome        | Core  | Coef  | P-value  | FWER            | FDR      |
|----------------|-------|-------|----------|-----------------|----------|
| Shock          | Core5 | 2.57  | 1.08e-06 | <b>1.94e-05</b> | 1.94e-05 |
| Pneumonia-ARDS | Core5 | 1.99  | 8.95e-05 | <b>0.00152</b>  | 0.000805 |
| ECMO or Death  | Core1 | 0.402 | 0.00022  | <b>0.00352</b>  | 0.00132  |
| Shock          | Core1 | 0.534 | 0.000381 | <b>0.00572</b>  | 0.00167  |
| Shock          | Core6 | 1.82  | 0.000465 | <b>0.00651</b>  | 0.00167  |
| ECMO or Death  | Core5 | 2.65  | 0.000601 | <b>0.00781</b>  | 0.0018   |
| Pneumonia-ARDS | Core1 | 0.653 | 0.00891  | 0.107           | 0.0229   |
| Pneumonia-ARDS | Core2 | 0.726 | 0.04     | 0.44            | 0.09     |

Table S15: SHIVERS adjusted serum cores and individual cytokine associations with phenotypes

| Outcome | Core  | Coef | P-value | FWER  | FDR   |
|---------|-------|------|---------|-------|-------|
| SARI    | Core5 | 2.95 | 0.0465  | 0.279 | 0.279 |

## REFERENCES

Oshansky, C. M., Gartland, A. J., Wong, S.-S., Jeevan, T., Wang, D., Roddam, P. L., et al. (2014). Mucosal immune responses predict clinical outcomes during influenza infection independently of age and viral load. *American journal of respiratory and critical care medicine* 189, 449–462. doi:10.1164/rccm.201309-1616OC
