# Supplementary material for: A Modular Cytokine Analysis Method Reveals Novel Associations With Clinical Phenotypes and Identifies Sets of Co-signaling Cytokines Across Influenza Natural Infection Cohorts and Healthy Controls
Source: Front Immunol. 2019 Jun 18;10:1338. doi: 10.3389/fimmu.2019.01338 (PMC6594355; doi:10.3389/fimmu.2019.01338)
Supplement: Supplementary file 1 [file Table_1.xlsx]

## Sheet: FLU09 patient info
ID	Age	Gender	Status	FluPositive	Strain	Total	Systemic	Upper RT	Lower RT	Any LRT	Gastrointestinal	log-Viral-Load	Intensive Care Unit	Death
3200	15.0753	Female	CONTACT	FALSE	Negative	222	116	73	33	1	0		0	0
3201	1.50278	Male	INDEX	TRUE	A (pH1)	240	98	100	35	1	7	2.29617	0	0
3202	3.74444	Male	INDEX	TRUE	A (H3)	171	100	27	44	1	0	3.07623	0	0
3203	13.0528	Female	CONTACT	FALSE	Negative					0
3204	6.63333	Female	CONTACT	FALSE	Negative
3205	1.15833	Female	INDEX	TRUE	B	0	0	0	0	0	0	2.71966	0	0
3206	19.0528	Female	FLU-POSITIVE CONTACT	TRUE	A (pH1)					0		2.20456	0	0
3207	12.5667	Male	FLU-POSITIVE CONTACT	TRUE	A (H3)					0		-0.321455
3208	6.07993	Male	CONTACT	FALSE	Negative
3209	19.2222	Female	CONTACT	FALSE	Negative	0	0	0	0	0	0
3210	7.16397	Male	FLU-POSITIVE CONTACT	TRUE	A (pH1)							0.106534	0	0
3211	40.6528	Female	CONTACT	FALSE	Negative	271	185	43	43	1
3212	21.4194	Female	FLU-POSITIVE CONTACT	TRUE	A (H3)	0	0	0	0	0	0	0.099441	0	0
3213	3.93649	Female	CONTACT	FALSE	Negative
3214	21.8028	Female	CONTACT	FALSE	Negative
3215	0.877778	Female	INDEX	TRUE	A (pH1)	318	62	128	64	1	64	3.53856	0	0
3216	21.1694	Female	CONTACT	FALSE	Negative	0	0	0	0	0	0
3217	49.3806	Female	CONTACT	FALSE	Negative	362	128	129	105	1	0
3218	2.32778	Female	CONTACT	FALSE	Negative	274	6	166	102	1	0
3219	2.35833	Male	INDEX	TRUE	A (H3)							4.03995
3220	50.5361	Female	CONTACT	FALSE	Negative	0	0	0	0	0	0
3221	52.9278	Female	CONTACT	FALSE	Negative	0	0	0	0	0	0
3222	3.75278	Male	INDEX	TRUE	B							2.63512	0	0
3223	0.05201	Female	INDEX	TRUE	A (pH1)					0		3.39337	0	0
3224	24.6167	Male	CONTACT	FALSE	Negative	0	0	0	0	0	0
3225	6.56944	Male	INDEX	TRUE	A (pH1)							1.93897	0	0
3226	36.1167	Female	CONTACT	FALSE	Negative
3227	28.5361	Female	FLU-POSITIVE CONTACT	TRUE	A (H3)	455	169	189	97	1	0	4.27993	0	0
3228	18.3028	Male	CONTACT	FALSE	Negative	98	0	28	70	1	0
3229	0.0694444	Female	INDEX	TRUE	A (pH1)					0		3.83295
3230	2.11944	Male	INDEX	TRUE	A (H3)	320	43	58	132	1	87	4.94063	0	0
3231	28.6915	Female	INDEX	TRUE	A (pH1)	141	56	42	43	1	0	1.31025	0	0
3232	24.3611	Female	CONVERTED FLU-POSITIVE CONTACT	TRUE	A (H3)	143	57	43	43	1	0	3.04578	0	0
3233	3.12222	Female	INDEX	TRUE	A (H3)	85	27	29	29	1	0	7.1978	0	0
3234	20.9083	Female	CONTACT	FALSE	Negative
3235	12.25	Female	CONTACT	FALSE	Negative	28	14	14	0	0	0
3236	5.50278	Male	INDEX	TRUE	A (H3)	419	219	128	35	1	37	1.86344	0	0
3237	2.40278	Male	INDEX	TRUE	B	149	64	48	37	1	0	5.15437	0	0
3238	55.6694	Male	CONTACT	FALSE	Negative	38	38	0	0	0	0
3239	0.522222	Female	INDEX	TRUE	A (H3)	123	45	17	45	1	16	6.71079	0	0
3240	7.88889	Female	INDEX	TRUE	A (pH1)	121	7	56	58	1	0	0	0	0
3241	26.2972	Female	CONTACT	FALSE	Negative					0
3242	3.56111	Male	INDEX	TRUE	A (H3)							3.66581	0	0
3243	23.1722	Female	CONTACT	FALSE	Negative	72	56	9	7	1	0
3244	23.0889	Female	FLU-POSITIVE CONTACT	TRUE	A	0	0	0	0	0	0	1.56556	0	0
3245	0.319444	Male	INDEX	TRUE	A (pH1)							3.03997	0	0
3246	4.22778	Male	INDEX	TRUE	B	426	86	185	125	1	30	1.01182	0	0
3247	3.75855	Female	CONVERTED FLU-POSITIVE CONTACT	TRUE	A (pH1)							2.4282	0	0
3248	23.5611	Female	CONVERTED FLU-POSITIVE CONTACT	TRUE	A (pH1)					0		1.86771	0	0
3249	0.58034	Male	CONTACT	FALSE	Negative
3250	2.67778	Female	INDEX	TRUE	B	213	64	69	80	1	0	3.26181	0	0
3251	11.5303	Male	INDEX	TRUE	A (pH1)	252	84	98	42	1	28	3.17155	0	0
3252	23.4278	Male	CONTACT	FALSE	Negative	0	0	0	0	0	0
3253	4.78889	Male	INDEX	TRUE	A (pH1)							4.47982	0	0
3254	17.1944	Female	CONTACT	FALSE	Negative					0
3255	0.80208	Female	INDEX	TRUE	A (pH1)							2.20829	0	0
3256	6.71944	Male	INDEX	TRUE	B							1.63569	0	0
3257	31.4778	Male	CONVERTED FLU-POSITIVE CONTACT	TRUE	A (pH1)							1.70328
3258	19.5444	Male	CONTACT	FALSE	Negative
3259	3.575	Female	FLU-POSITIVE CONTACT	TRUE	A (H3)							6.13907
3260	14.0944	Female	INDEX	TRUE	A (pH1)								1	1
3261	9.84167	Male	INDEX	TRUE	A (H3)	99	0	28	71	1	0	4.64792	0	0
3262	43.2713	Male	CONTACT	FALSE	Negative					0
3263	1.91944	Female	INDEX	TRUE	B					0		5.7245	0	0
3264	2.95278	Female	CONTACT	FALSE	Negative	41	0	41	0	0	0
3265	50.7778	Female	FLU-POSITIVE CONTACT	TRUE	A							1.13154
3266	57.3639	Female	CONTACT	FALSE	Negative	0	0	0	0	0	0
3267	0.122222	Male	INDEX	TRUE	A (H3)							5.03991	0	0
3268	0.838889	Female	INDEX	TRUE	A (H3)	0	0	0	0	0	0	1.38766	0	0
3269	46.8278	Female	CONTACT	FALSE	Negative	66	46	20	0	0	0
3270	7.00833	Male	INDEX	TRUE	B							3.66579	0	0
3271	31.1826	Female	CONTACT	FALSE	A (pH1)							0.948963	0	0
3272	17.9667	Female	CONTACT	FALSE	Negative	37	37	0	0	0	0
3273	32.4389	Male	CONTACT	FALSE	Negative
3274	2.58144	Male	INDEX	TRUE	A (pH1)	36	0	0	36	1	0	1.86651	0	0
3275	3.68889	Female	FLU-POSITIVE CONTACT	TRUE	A (H3)	96	0	55	41	1		0.854007	0	0
3276	20.4472	Male	CONTACT	FALSE	Negative					0
3277	12.0832	Male	CONTACT	FALSE	Negative
3278	19.1733	Female	CONTACT	FALSE	Negative	233	59	121	47	1	6
3279	30.125	Female	CONTACT	FALSE	Negative	40	0	19	21	1	0
3280	35.9639	Male	CONTACT	FALSE	Negative
3281	2.1	Female	INDEX	TRUE	B							6.02959	0	0
3282	32.2885	Male	CONVERTED FLU-POSITIVE CONTACT	TRUE	A (pH1)	113	0	99	14	1	0		0	0
3283	1.22913	Female	INDEX	TRUE	A (pH1)							4.48148
3284	27.3361	Female	CONTACT	FALSE	Negative	0	0	0	0	0	0
3285	4.59444	Male	INDEX	TRUE	A (pH1)							4.41161	0	0
3286	6.47778	Male	FLU-POSITIVE CONTACT	TRUE	A (H3)	5	0	0	5	1	0	3.44722	0	0
3287	1.78889	Male	INDEX	TRUE	A (H3)							2.13313	0	0
3288	0.84314	Female	CONVERTED FLU-POSITIVE CONTACT	TRUE	A (pH1)	120	0	68	40	1	12	1.1212
3289	3.87079	Male	INDEX	TRUE	A (pH1)							3.18138	0	0
3290	27.675	Male	CONTACT	FALSE	Negative
3291	4.04167	Female	CONTACT	FALSE	Negative	14	0	7	7	1	0
3292	21.45	Female	CONTACT	FALSE	Negative
3293	28.1028	Female	CONTACT	FALSE	Negative
3294	28.2444	Female	CONVERTED FLU-POSITIVE CONTACT	TRUE	B	68	41	0	14	1	13	0.025796
3295	22.5528	Female	FLU-POSITIVE CONTACT	TRUE	B	302	56	130	96	1	20	2.76195	0	0
3296	13.3472	Male	FLU-POSITIVE CONTACT	TRUE	A (H3)	0	0	0	0	0	0
3297	6.83333	Male	INDEX	TRUE	B	328	256	57	15	1	0	5.45612	0	0
3298	17.2806	Female	CONTACT	FALSE	Negative
3299	25.4667	Female	CONTACT	FALSE	Negative
3300	9.14167	Male	INDEX	TRUE	A (pH1)	241.5	135	72	34.5	1	0	2.96411	0	0
3301	1.85833	Female	FLU-POSITIVE CONTACT	TRUE	B	123	88	5	27	1	3	4.29214	0	0
3302	49.825	Female	CONTACT	FALSE	Negative	326	123	83	35	1	85
3303	32.2417	Female	CONTACT	FALSE	Negative					0
3304	1.31111	Female	FLU-POSITIVE CONTACT	TRUE	A (H3)	69	0	55	14	1	0	4.94439	0	0
3305	6.94444	Male	INDEX	TRUE	B	322	110	86	106	1	20	0.553477	0	0
3306	1.58056	Male	INDEX	TRUE	A (H3)							4.06236	0	0
3307	28.9899	Female	CONVERTED FLU-POSITIVE CONTACT	TRUE	A (pH1)	0	0	0	0	0	0	-0.107932	0	0
3308	30.2272	Female	INDEX	TRUE	A (pH1)	35	15	6	14	1	0	1.07361	0	0
3309	47.8472	Female	CONTACT	FALSE	Negative	370	165	85	120	1	0
3310	28.2833	Male	CONTACT	FALSE	Negative
3311	12.5361	Male	INDEX	TRUE	A (H3)	114	71	0	43	1		-0.145535	0	0
3312	25.5461	Female	CONTACT	FALSE	Negative	98	28	14	56	1	0
3313	1.78889	Female	INDEX	TRUE	A (H3)							2.09703	0	0
3314	21.1639	Female	CONTACT	FALSE	Negative	0	0	0	0	0	0
3315	2.96667	Male	FLU-POSITIVE CONTACT	TRUE	A (H3)	57	0	0	57	1	0	0.692163	0	0
3316	21.9108	Female	CONTACT	FALSE	Negative
3317	25.525	Female	CONTACT	FALSE	Negative	0	0	0	0	0	0
3318	29.0778	Female	FLU-POSITIVE CONTACT	TRUE	A (H3)					0		0.118661	0	0
3319	46.2111	Female	CONTACT	FALSE	Negative					0
3320	13.1111	Male	CONTACT	FALSE	Negative	38	0	38	0	0	0
3321	5.11389	Male	CONVERTED FLU-POSITIVE CONTACT	TRUE	B	0	0	0	0	0	0		0	0
3322	3.41667	Female	INDEX	TRUE	A (H3)					0	42	3.9494	0	0
3323	25.7778	Male	CONTACT	FALSE	Negative	56	0	28	28	1	0
3324	1.35505	Male	INDEX	TRUE	A (pH1)	182	0	84	56	1	42	3.90617	0	0
3325	8.65556	Female	CONTACT	FALSE	Negative	0	0	0	0	0	0
3326	41.5467	Female	CONTACT	FALSE	Negative
3327	8.96667	Male	INDEX	TRUE	B							3.35581	0	0
3328	5.14722	Male	INDEX	TRUE	A (H3)							3.24917	0	0
3329	37.0417	Female	CONTACT	FALSE	Negative	14	0	0	14	1	0
3330	23.3	Female	CONTACT	FALSE	Negative	0	0	0	0	0	0
3331	6.93889	Male	CONTACT	FALSE	Negative	50	0	0	50	1	0
3332	8.32222	Female	INDEX	TRUE	B	706	378	185	143	1	0	3.35744	0	0
3333	1.18611	Female	CONTACT	FALSE	Negative	74	0	38	36	1	0
3334	18.1111	Female	CONTACT	FALSE	Negative	482	223	31	228	1	0
3335	30.0944	Female	CONTACT	FALSE	Negative	67	29	38	0	0	0
3336	40.7833	Male	CONTACT	FALSE	Negative	0	0	0	0	0	0
3337	19.8472	Male	CONVERTED FLU-POSITIVE CONTACT	TRUE	B					0		5.12076	0	0
3338	20.9855	Male	CONTACT	FALSE	Negative					0
3339	41.6694	Female	CONTACT	FALSE	Negative	418	98	121	149	1	50
3340	30.075	Female	CONTACT	FALSE	Negative
3341	6.10556	Male	INDEX	TRUE	A							1.63202	0	0
3342	30.975	Female	INDEX	TRUE	B	293	276	15	1	1	1	1.23002	0	0
3343	65.1917	Female	CONTACT	FALSE	Negative					0
3344	1.92992	Male	INDEX	TRUE	A (pH1)			100	48	1		4.61475	0	0
3345	22.8472	Female	CONTACT	FALSE	Negative
3346	0.341667	Female	INDEX	TRUE	B	198	21	99	41	1	37	3.22495	0	0
3347	38.2289	Female	CONTACT	FALSE	Negative
3348	9.06667	Female	CONVERTED FLU-POSITIVE CONTACT	TRUE	A (H3)	0	0	0	0	0	0	1.14296	0	0
3349	30.2778	Female	INDEX	TRUE	B					0		6.73926	0	0
3350	26.121	Female	CONTACT	FALSE	Negative
3351	56.6	Male	CONTACT	FALSE	Negative	0	0	0	0	0	0
3352	3.375	Male	CONVERTED FLU-POSITIVE CONTACT	TRUE	A (H3)	269	20	84	46	1	119	1.72667	0	0
3353	34.1167	Female	FLU-POSITIVE CONTACT	TRUE	A (pH1)	147	70	56	21	1	0	0.923953	0	0
3354	32.0278	Female	CONTACT	FALSE	Negative	6	2	0	1	1	3
3355	12.1278	Male	CONVERTED FLU-POSITIVE CONTACT	TRUE	A (H3)	37	7	0	30	1	0	2.08181	0	0
3356	20.0917	Female	CONTACT	FALSE	Negative
3357	26.5806	Female	FLU-POSITIVE CONTACT	TRUE	A (H3)	203	82	95	26	1	0	2.66207	0	0
3358	19.9945	Female	CONTACT	FALSE	Negative	358	226	54	49	1	29
3359	30.0472	Female	CONTACT	FALSE	Negative	102	41	23	19	1	19
3360	33.2333	Female	CONTACT	FALSE	Negative	403	193	131	0	0	79
3361	3.18056	Female	INDEX	TRUE	A (H3)	188	44	72	72	1	0	2.16571	0	0
3362	22.825	Female	FLU-POSITIVE CONTACT	TRUE	A (pH1)							3.44463
3363	2.8	Female	INDEX	TRUE	A (H3)					0		1.98038	0	0
3364	0.719444	Female	INDEX	TRUE	A (pH1)							3.67073	1	0
3365	27.7722	Female	FLU-POSITIVE CONTACT	TRUE	A (pH1)	149	64	49	36	1	0	3.97344	0	0
3366	11.1861	Male	INDEX	TRUE	A (pH1)					0		2.06445	0	0
3367	11.6417	Female	INDEX	TRUE	A (H3)	22	11	0	11	1	0	2.29383	0	0
3368	2.83056	Male	CONTACT	FALSE	Negative					0
3369	0.272222	Female	INDEX	TRUE	A (pH1)	164	0	49	115	1	0	3.29133	0	0
3370	30.0821	Female	CONTACT	FALSE	Negative	42	0	13	29	1	0
3371	34.6083	Female	CONTACT	FALSE	Negative
3372	34.2944	Female	CONTACT	FALSE	Negative	0	0	0	0	0	0
3373	2.62778	Male	INDEX	TRUE	B							5.39984	0	0
3374	23.7476	Female	CONTACT	FALSE	Negative
3375	0.333333	Male	INDEX	TRUE	A (pH1)	244	50	128	50	1	16	3.09379	0	0
3376	9.07747	Female	CONTACT	FALSE	Negative								0	0
3377	28.6417	Female	CONTACT	FALSE	Negative	0	0	0	0	0	0
3378	25.5944	Female	FLU-POSITIVE CONTACT	TRUE	A							1.67562
3379	0.58582	Male	CONTACT	FALSE	Negative
3380	10.5917	Male	CONTACT	FALSE	Negative	9	0	0	9	1	0
3381	0.741667	Female	INDEX	TRUE	A (pH1)	627	214	214	93	1	106	2.3005	0	0
3382	0.3	Male	INDEX	TRUE	A (pH1)							2.93309	1	0
3383	19.6028	Female	CONTACT	FALSE	Negative
3384	41.425	Female	CONTACT	FALSE	Negative	377	185	150	7	1	35
3385	6.47778	Male	CONTACT	FALSE	Negative	3	0	0	3	1	0
3386	24.5333	Female	CONTACT	FALSE	Negative
3387	34.1	Male	CONTACT	FALSE	Negative	0	0	0	0	0	0
3388	28.9528	Male	CONTACT	FALSE	Negative	9	3	6	0	0	0
3389	0.4	Female	INDEX	TRUE	B					0		4.0872	0	0
3390	26.4472	Male	CONVERTED FLU-POSITIVE CONTACT	TRUE	A (pH1)							1.72848
3391	4.625	Male	FLU-POSITIVE CONTACT	TRUE	A (H3)	0	0	0	0	0	0	3.29818	0	0
3392	1.91389	Female	INDEX	TRUE	A (H3)							5.3452	0	0
3393	0.236111	Male	FLU-POSITIVE CONTACT	TRUE	A (H3)	4	0	0	4	1	0	5.71034	0	0
3394	7.43611	Female	INDEX	TRUE	A (H3)					0		2.39443	0	0
3395	37.0083	Female	CONTACT	FALSE	Negative					0
3396	3.06111	Female	INDEX	TRUE	A (pH1)					0		3.23976	0	0
3397	21.6644	Female	CONTACT	FALSE	Negative
3398	54.9694	Male	INDEX	TRUE	A (pH1)	449	272	57	120	1	0	2.15189	0	0
3399	20.7829	Female	CONVERTED FLU-POSITIVE CONTACT	TRUE	possible B and A (day 7) coinfected					0		1.03705
3400	0.813889	Male	INDEX	TRUE	A (pH1)					0		2.85162	0	0
3401	34.35	Female	CONVERTED FLU-POSITIVE CONTACT	TRUE	Negative	133	52	35	46	1	0		0	0
3402	0.84862	Female	INDEX	TRUE	A (pH1)	589	197	120	102	1	170	3.2224	0	0
3403	22.1972	Female	CONTACT	FALSE	Negative	0	0	0	0	0	0
3404	14.5194	Female	CONTACT	FALSE	Negative	0	0	0	0	0	0
3405	30.6361	Female	CONVERTED FLU-POSITIVE CONTACT	TRUE	A (H3)	0	0	0	0	0	0	0.509662
3406	28.4917	Male	CONTACT	FALSE	Negative
3407	43.4972	Female	CONTACT	FALSE	Negative
3408	4.84722	Female	FLU-POSITIVE CONTACT	TRUE	A (H3)							3.30855	0	0
3409	42.3222	Female	CONTACT	FALSE	Negative	120	35	50	35	1	0
3410	36.6722	Female	CONTACT	FALSE	Negative	0	0	0	0	0	0
3411	25.4833	Female	CONTACT	FALSE	Negative
3412	0.444444	Male	INDEX	TRUE	A (H3)	70	0	14	28	1	28	2.09762	0	0
3413	1.55	Male	INDEX	TRUE	A (H3)							2.79422	0	0
3414	10.9111	Female	INDEX	TRUE	A (pH1)					0		3.83449	0	0
3415	13.6	Female	INDEX	TRUE	B	42	42	0	0	0	0	1.07078	0	0
3416	25.4944	Female	CONTACT	FALSE	Negative
3417	0.175	Male	INDEX	TRUE	A (pH1)							3.06963	0	0
3418	35.2944	Male	FLU-POSITIVE CONTACT	TRUE	A (H3)	0	0	0	0	0	0
3419	12.1352	Male	CONTACT	FALSE	Negative								0	0
3420	27.3361	Female	CONVERTED FLU-POSITIVE CONTACT	TRUE	A (pH1)	154	14	42	91	1	7	3.22662
3421	0.152778	Female	CONTACT	FALSE	Negative	14	0	0	14	1	0
3422	23.1016	Female	CONTACT	FALSE	Negative
3423	1.08889	Female	INDEX	TRUE	A (H3)	158	29	86	43	1	0	2.55244	0	0
3424	3.44444	Male	INDEX	TRUE	A (H3)	6	0	0	3	1	3	5.16836	0	0
3425	8.28634	Female	INDEX	TRUE	A (pH1)	196	112	42	28	1	14	3.46994	0	0
3426	12.1028	Female	INDEX	TRUE	A	64	0	43	21	1	0	1.69749
3427	0.408333	Female	CONTACT	FALSE	Negative
3428	28.325	Female	CONTACT	FALSE	Negative
3429	9.65556	Male	INDEX	TRUE	A (H3)					0		2.65654	0	0
3430	7.20278	Male	INDEX	TRUE	A (H3)	51	8	21	22	1	0	1.25831	0	0
3431	19.3278	Male	CONTACT	FALSE	Negative
3432	26.0944	Female	FLU-POSITIVE CONTACT	TRUE	A (pH1)					0		1.73419
3433	1.87778	Female	INDEX	TRUE	A (pH1)	412	207	44	73	1	88	3.1445	0	0
3434	25.4472	Female	FLU-POSITIVE CONTACT	TRUE	A (H3)							1.96666
3435	44.9583	Female	FLU-POSITIVE CONTACT	TRUE	A (pH1)					0		1.32572	0	0
3436	8.35556	Female	CONVERTED FLU-POSITIVE CONTACT	TRUE	A	3	0	0	3	1	0	2.50612	0	0
3437	26.3306	Female	CONTACT	FALSE	Negative	221	71	121	29	1	0
3438	54.5031	Female	CONTACT	FALSE	Negative								0	0
3439	9.26944	Male	CONTACT	FALSE	Negative	35	0	35	0	0	0
3440	16.0611	Female	INDEX	TRUE	B	128	100	28	0	0		1.04763	0	0
3441	0.602778	Male	CONTACT	FALSE	Negative
3442	0.186111	Female	INDEX	TRUE	A (pH1)	447	228	121	21	1	77	1.88245	0	0
3443	14.9611	Female	CONTACT	FALSE	Negative	278	165	11	52	1	50
3444	22.5306	Female	CONTACT	FALSE	Negative
3445	29.2691	Female	CONTACT	FALSE	Negative
3446	20.1472	Female	CONTACT	FALSE	Negative
3447	2.59167	Male	INDEX	TRUE	A (pH1)							3.68254	0	0
3448	24.425	Female	FLU-POSITIVE CONTACT	TRUE	B							-0.306545
3449	24.2978	Female	CONTACT	FALSE	Negative					0
3450	1.56584	Male	INDEX	TRUE	A (pH1)	318	33	102	139	1	44	3.44184	0	0
3451	44.5639	Male	CONTACT	FALSE	Negative	0	0	0	0	0	0
3452	33.7806	Female	CONTACT	FALSE	Negative
3453	0.847222	Male	CONTACT	FALSE	Negative	97	13	70	14	1	0
3454	0.491667	Female	INDEX	TRUE	A (H3)					0		2.76074	0	0
3455	2.04167	Female	INDEX	TRUE	A (H3)	77	7	70	0	0	0	2.54667	0	0
3456	33.17	Female	FLU-POSITIVE CONTACT	TRUE	A (pH1)							0.676824	0	0
3457	30.6	Female	CONTACT	FALSE	Negative	34	0	34	0	0	0
3458	33.3833	Female	CONTACT	FALSE	Negative
3459	0.716667	Female	INDEX	TRUE	A (pH1)	238	140	35	63	1	0	3.0019	0	0
3460	15.7049	Female	INDEX	TRUE	A (pH1)							1.47459	0	0
3461	7.84167	Male	FLU-POSITIVE CONTACT	TRUE	A (pH1)	289	77	147	65	1	0	0	0	0
3462	25.2944	Female	CONVERTED FLU-POSITIVE CONTACT	TRUE	A (H3)	115	58	0	57	1	0	0.588594	0	0
3463	19.3074	Female	CONTACT	FALSE	Negative
3464	22.6972	Female	CONTACT	FALSE	Negative	219	100	64	42	1	13
3465	29.9389	Male	FLU-POSITIVE CONTACT	TRUE	A (H3)					0		0.699935	0	0
3466	22.9537	Female	CONTACT	FALSE	Negative
3467	69.5319	Female	FLU-POSITIVE CONTACT	TRUE	A (pH1)	0	0	0	0	0	0	2.11048	0	0
3468	12.3186	Male	INDEX	TRUE	A (pH1)							5.02579	0	0
3469	14.4167	Male	CONVERTED FLU-POSITIVE CONTACT	TRUE	A (pH1)	98	49	49	0	0	0	0	0	0
3470	13.9	Male	INDEX	TRUE	A (H3)	70	0	42	28	1	0	2.9418	0	0
3471	0.8	Male	INDEX	TRUE	A (H3)							3.74751	0	0
3472	9.01111	Female	CONTACT	FALSE	Negative
3473	18.9889	Female	CONTACT	FALSE	Negative					0
3474	3.45	Male	INDEX	TRUE	A (H3)							3.4849
3475	0.138889	Male	INDEX	TRUE	A (pH1)					0		3.13943	0	0
3476	7.31111	Male	FLU-POSITIVE CONTACT	TRUE	A (H3)	173	29	86	58	1	0	0.713792	0	0
3477	14.5528	Male	INDEX	TRUE	A (pH1)							1.32665	0	0
3478	11.0111	Male	INDEX	TRUE	B / A							3.6376	0	0
3479	5.97044	Male	CONVERTED FLU-POSITIVE CONTACT	TRUE	A (pH1)	28	28	0	0	0	0	2.69612	0	0
3480	29.6194	Male	INDEX	TRUE	A (pH1)							3.63911
3481	4.88889	Female	CONVERTED FLU-POSITIVE CONTACT	TRUE	A (H3)					0		1.58001	0	0
3482	1.96944	Female	INDEX	TRUE	A (pH1)							5.40251	1	0
3483	39.2722	Female	CONTACT	FALSE	Negative	0	0	0	0	0	0
3484	35.2944	Female	FLU-POSITIVE CONTACT	TRUE	A (H3)
3485	40.5694	Female	FLU-POSITIVE CONTACT	TRUE	A (pH1)							2.28586
3486	18.9926	Female	CONTACT	FALSE	Negative	202	101	87	14	1	0
3487	24.9411	Female	CONTACT	FALSE	Negative	0	0	0	0	0	0
3488	0.97728	Male	INDEX	TRUE	A (pH1)	140	26	71	43	1	0	3.80755	0	0
3489	27.2944	Female	CONTACT	FALSE	Negative
3490	25.9129	Female	CONTACT	FALSE	Negative
3491	20.8444	Female	CONTACT	FALSE	Negative
3492	24.475	Female	CONTACT	FALSE	Negative					0
3493	37.8222	Male	FLU-POSITIVE CONTACT	TRUE	A (H3)	18	7	5	6	1	0	2.59422	0	0
3494	4.39722	Female	CONTACT	FALSE	Negative
3495	0.525	Female	INDEX	TRUE	A (H3)	265	112	67	24	1	62	5.15327	0	0
3496	1.80278	Male	CONTACT	FALSE	Negative	192	28	90	74	1	0
3497	43.3583	Female	CONTACT	FALSE	Negative	56	7	28	21	1	0
3498	36.7833	Female	CONTACT	FALSE	Negative	0	0	0	0	0	0
3499	62.9072	Male	CONVERTED FLU-POSITIVE CONTACT	TRUE	A (pH1)	468	200	103	68	1	97	0.100477	0	0
3500	47.8444	Male	CONTACT	FALSE	Negative	0	0	0	0	0	0
3501	31.7222	Female	CONTACT	FALSE	Negative					0
3502	13.775	Female	FLU-POSITIVE CONTACT	TRUE	A (pH1)								0	0
3503	1.58056	Male	INDEX	TRUE	B							3.22974	0	0
3504	0.402778	Male	INDEX	TRUE	A (H3)							2.18591		0
3505	25.2139	Female	CONTACT	FALSE	Negative	33	19	9	2	1	3
3506	27.3222	Female	CONTACT	FALSE	Negative	0	0	0	0	0	0
3507	32.1028	Male	FLU-POSITIVE CONTACT	TRUE	A (H3)							0.529686

## Sheet: FLU09 plasma
ID	EGF	Eotaxin	FGF-2	FLT3L	FKN	GCSF	GM-CSF	GRO	IFNα2	IFNγ	IL1α	IL1β	IL1Ra/Ra2	IL2	IL3	IL4	IL5	IL6	IL7	IL8	IL9	IL10	IL12-P40	IL12-P70	IL13	IL15	IP10	MCP1	MCP3	MDC	MIP1α	MIP1β	sCD40-L	TGFα	TNFα	TNFβ	VEGF
3200	5.24	24.34	39.02	1.94	20.86	39.52	6.6	98.41	8.12	9.97	2.24	2.83	24.24	0.95	2.76	1.86	0.75	2.67	2.5	3.34	3.04	2.53	1.61	2.59	0.82	0.83	539.44	199.33	9.66	775.28	3.01	18.4	530.95	1.39	15.25	2.09	113.09
3201
3202	179.16	39.41	28.62	2.5	49.11	20.92	356.27	1019.9	27.21	8.36	17.34	1.8	5.67	1.49	1.67	1.94	0.66	65.71	0.76	357.66	2.26	31.87	1	1.87	1.55	1.26	3560.13	2737.32	67.07	1158	171.51	150.73	10860	3.61	15.93	1.61	77.21
3203
3204	191.72	42.49	7.68	0.67	33.36	10.44	22.71	2038.28	25.98	7.36	0.13	0.28	2.25	0.45	0.27	2.53	0.5	0.26	0.35	2.73	0.33	0.09	0.56	1.01	0.48	0.14	225.61	159.52	6.66	1867.52	8.43	35.67	11849.4	2.36	4.91	0.53	45.34
3205
3206	132	93.76	33.89	0.47	128	67.87	147	4132	27.43	13.54	49.02	0.18	22.54	3.48	5.25	3.13	0.38	0.58	2.73	31.74	0.1	17.3	9.13	6.08	0.04	0.67	1130	301	23.69	1139	208	110	13420	24.26	14.16	0.59	32.6
3207
3208
3209	12.91	18.75	17.37	2.5	2.62	12.83	231.27	149.67	6.48	63.64	10.52	1.61	1.88	1.25	1.67	1.94	0.66	3.04	1.69	4.91	2.26	1.02	1	1.87	326.74	1.26	39.24	98.76	7.09	965.21	49.08	1.51	250.07	1.9	0.68	1.61	400.35
3210	44.79	3.28	16.62	1.94	10.21	13.13	2.64	560.86	2.93	2.17	2.24	2.83	2.82	0.95	2.76	1.86	0.75	2.67	2.5	2.99	3.04	2.53	1.61	2.59	0.82	0.83	103.12	60.64	2.57	200.9	3.01	6.56	7576	1.39	4.45	2.09	2.47
3211	2.94	11.93	3.33	2.5	2.62	28.25	2.28	34.31	6.28	2.22	42.25	1.61	3.42	1.25	1.67	1.94	1.58	7.05	0.85	6.7	2.26	4.09	1	3.61	10.53	1.26	69.12	136.97	11.03	1097.81	2.66	1.51	267.34	0.39	3.55	3.9	12.33
3212	7.29	28.21	41.33	0.61	22.92	40.79	5.04	66.01	9.19	1.58	1.14	1.43	3.24	1.51	0.76	0.28	1.24	10.49	0.5	53.65	1.3	1.35	1.95	1.97	1.11	0.7	309.25	95.88	4.02	656.32	26.4	72.61	734.39	2.06	13.77	1.1	5.71
3213
3214	48.15	19.79	3.33	2.5	2.62	23.36	2.49	1.08	2.25	16.79	1.52	1.61	1.88	1.25	1.67	1.94	0.66	0.42	36.16	1.3	2.26	1.02	1	63.82	1.55	1.26	51.74	61.86	3.23	422.78	2.97	1.51	369.73	0.39	2.89	1.61	429.17
3215
3216	124	66.48	143	63.23	717	10.38	503	224	365	113	305	64.72	273	48.73	20.1	87.68	24.01	30.83	10.45	23.18	147	68.76	451	79.97	24.27	98.87	167	63.73	74.79	548	67.7	198	237	18.1	30.36	130	342
3217	84.64	695.09	11.94	0.67	16.9	46.83	6.72	1466.15	7.95	35.72	0.13	0.28	2.25	0.4	0.27	2.53	0.5	0.26	0.35	17.16	0.33	0.09	0.56	0.4	0.48	0.14	311.94	705.11	3.94	828.37	59.19	14.74	9532.36	8.19	4.45	0.53	79.39
3218
3219
3220	23.57	111.85	65.11	3.25	88.71	60.23	17.02	321.67	15.65	4.46	1.14	115.3	65.75	1.51	0.76	0.28	1.24	106.1	6.21	671.24	1.3	2.68	2.21	3.39	1.11	0.76	139.81	200.93	10.56	880.19	136.43	325.19	4503.14	5.35	54.07	1.1	76.94
3221	3.29	10.01	4.93	3.23	13.13	2.68	2.01	181.08	4.84	1.22	2.57	2.49	4.83	2.33	0.85	2.85	2.8	2.97	2.95	2.68	2.79	2.91	2.8	2.66	0.56	2.11	114.51	24.87	3.3	638.19	3.03	9.33	1209	2.41	5	2.06	6.94
3222
3223
3224	109	57.29	133	67.72	630	3.65	460	208	136	112	305	66.99	314	47.54	16.73	14.45	24.26	27.01	28.51	23.18	105	71.98	416	87.61	64.43	97.37	162	69.32	67.97	525	67.86	179	192	19.14	24.82	118	305
3225	205	38.6	32.18	0.47	142	33.18	271	4173	29.92	14.93	42.25	0.32	27.92	2.57	4.55	0.84	1.55	1	0.14	16.04	0.67	45.63	11.3	5.39	0.04	2.11	1070	76.58	22.4	1464	35.34	87.97	9968	14.05	3.58	0.35	62.12
3226	3.29	33.1	4.93	3.23	6.02	2.68	2.01	7.22	0.97	0.93	2.57	2.49	4.83	2.33	0.85	2.85	2.8	2.97	2.95	2.68	2.79	2.91	2.8	2.66	0.56	2.11	7.58	108.49	3.3	449.76	3.03	2.82	538.21	2.41	1.22	2.06	6.94
3227	7.51	123.93	66.24	0.61	54.69	47.47	9.55	191.29	19.6	5.14	1.14	3.44	5.63	1.51	0.76	0.28	1.24	24.2	0.96	49.15	1.3	49.75	1.95	3.92	1.11	1.55	471.46	345.16	9.44	631.11	5.74	36.08	1398.79	5.26	21.64	1.1	63.2
3228	5.5	19.7	4.93	3.23	4.31	2.68	5.85	95.69	2.77	1.22	2.57	2.49	4.83	2.33	0.85	2.85	2.8	2.97	2.95	13.69	2.79	2.91	2.8	2.66	0.56	2.11	23.42	60.36	3.3	622.54	20.53	20.08	1012	2.41	2.73	2.06	6.94
3229	1284	354	30.86	33.78	109	238	124	5386	43.26	14.56	2889	1.46	228	3.48	13.71	4.79	0.38	71.08	0.76	3963	9.16	18.2	82.06	5.31	0.04	2.95	15164	2677	22.26	4031	394	326	27761	6.49	38.27	0.85	266
3230
3231	18.57	24.62	56.1	1.94	37.96	50.97	9.71	438.52	30	5.93	2.7	2.83	85.87	0.95	2.76	2.19	0.75	3.18	4.46	18.29	3.04	7.87	1.61	3.2	0.82	0.83	667.98	148.47	11.68	508.54	3.01	31.73	12630	1.39	15.51	2.1	123.09
3232	2.94	3.13	3.33	2.5	2.62	62.27	62.64	12.87	8.83	1.41	7.05	1.61	1.88	1.25	1.67	1.94	0.93	1.6	0.76	0.01	2.26	5.53	45.84	1.87	1.55	1.26	341.68	169.53	3.23	258.19	6.71	1.51	149.53	0.39	3.7	1.61	0.98
3233
3234	259.34	57.38	57.33	0.67	98.86	34.12	260	2443.29	45.35	77.2	0.13	1.06	24.67	11.61	1.02	2.53	0.5	11.54	3.82	26.04	2.58	0.09	0.56	80.18	0.48	0.76	355.14	85.34	13.38	2141.52	272.79	118.54	12524.9	5.94	6.07	0.53	297.28
3235	2.94	8.17	3.33	2.5	2.62	2.13	2.28	1.08	2.25	5.24	1.52	1.61	1.88	1.25	1.67	1.94	0.66	0.42	0.76	0.1	2.26	1.02	1	1.87	1.55	1.26	71.57	48.05	3.23	733.05	2.66	1.51	275.24	0.39	0.68	1.61	8.77
3236	150.11	96.11	9.47	2.5	49.11	20.78	24.39	1069.72	15.68	5.8	10.77	1.61	1.88	1.25	1.67	1.94	0.66	8.73	0.76	101.09	2.26	29.15	14.4	2.31	1.89	1.26	2900.82	1503.84	52.29	3224.1	51.45	46.99	10860	2.23	6.36	1.61	25.12
3237
3238	3.29	53.87	9.88	3.23	19.11	8.77	4.45	7.22	6.54	2.62	2.57	2.49	4.83	2.33	0.85	2.85	2.8	2.97	2.95	2.68	2.79	4.5	2.8	2.66	0.56	2.11	471.83	281.49	3.3	568.8	3.03	16.92	2255	2.41	10.85	2.06	6.94
3239
3240	114	64.67	147	75.47	1000	163	579	212	323	108	317	70.13	293	48.41	29.45	100	27.26	31.88	69.2	21.83	171	68.27	473	121	65.15	87.77	152	72.63	75.87	509	63.02	264	286	18.33	31.1	126	366
3241	11.53	70.93	84.26	0.61	54.69	38.69	40.87	111.21	18.99	2.99	12.29	1.43	8.06	1.51	0.76	0.28	1.24	3.56	0.54	10.56	1.3	5.9	26.98	1.97	1.52	2.02	424.87	243.2	35.5	1114.07	12.99	33.2	900.21	1.73	7.86	1.1	19.07
3242
3243	6.84	110.66	4.52	2.5	2.62	2.13	1015.88	570.22	2.25	2.83	1.52	1.61	1.88	1.25	1.67	1.94	0.66	0.42	0.76	15.76	2.26	1.02	1	1.87	1.55	1.26	122.04	62.42	3.23	850.99	2.66	1.51	3527.87	1.14	0.28	1.61	0.98
3244	46.21	23.86	71.21	25.44	138.07	47.04	15.89	115.95	28.75	28.65	12.92	29.06	75.87	7.04	0.85	17.76	2.8	8.26	8.31	22.98	4.48	3.85	51.66	20.86	8.85	4.14	112.98	51.59	24.4	565.33	7.47	34.96	1357	3.66	9.65	6.97	218.86
3245
3246
3247
3248	70.15	27.53	95.73	22.51	505	29.13	279	139	178	45.75	164	26.26	137	25.65	14.4	17.58	11.35	14.46	30.82	7.11	71.36	35.11	180	64.57	40.99	43.77	75.5	48.98	56.36	280	33.63	140	145	7.96	14.56	58.89	176
3249
3250
3251	131.1	75.6	322.96	130.75	206.06	514.39	220.54	568.04	495.41	330.41	108.63	30.8	1231	67.1	13.15	261.21	98.13	91.59	53.54	77.45	28.78	53.82	476.23	153.45	302.65	70.48	247.47	215.96	225.58	721.18	36.27	238.2	12630	50.83	57.19	501.17	1370
3252	2.94	31.81	19.63	2.5	2.62	2.13	7.96	1.08	2.25	2.95	1.52	1.61	1.88	1.25	1.67	1.94	0.66	0.42	0.76	1.21	2.26	1.02	1	1.87	1.55	1.26	49.98	51.05	3.23	708.6	2.66	1.51	1171.24	0.39	1.15	1.61	29.38
3253	163.39	64.09	15.76	0.67	59.9	98.98	107.71	2573.9	57.2	5.26	3.95	0.28	2.25	0.82	0.27	2.53	0.5	1.07	0.35	13.14	0.61	0.09	0.56	1.28	0.48	0.18	1356.3	238.88	11.57	2087.78	11.56	56.73	16919.3	2.15	14.16	0.53	110.88
3254	115.63	62.38	10.85	0.67	45.6	17.86	24.88	3124.45	43.56	26.32	95.17	0.28	2.25	0.45	0.27	2.53	0.5	6.93	0.35	23.34	5.14	0.09	0.56	1.06	1.12	0.14	374.28	251	20.2	2196.09	88.61	77.54	20577.6	10	9.04	0.53	273.71
3255
3256
3257	2.94	9.58	3.33	2.5	2.62	2.18	2.28	4.72	12.88	1.41	1.52	1.61	1.88	1.25	1.67	1.94	0.66	0.42	0.76	1.49	2.26	1.02	1	1.87	1.55	1.26	36.54	64.95	3.23	445.95	2.66	1.51	1128.46	0.39	1.22	1.61	0.98
3258	122.56	36.63	33.48	0.67	45.6	31.02	78.25	2295.92	102.55	8.46	0.13	0.28	2.25	2.21	0.27	2.53	0.5	0.26	0.35	9.88	0.33	10.21	0.56	1.7	0.48	0.14	864.64	154.63	13	795.52	57.85	95.33	12243.3	1.72	4.65	0.53	19.68
3259
3260	33.82	114	63.4	0.47	360	21670	160	930	47.97	29.81	191	4.34	373	9.2	5.28	6.24	0.76	405	3.65	537	19.18	100	59.29	9.94	0.04	25.13	6101	7395	156	301	91.6	117	1782	47.7	28.89	5.11	88.73
3261	20.17	20.2	54.56	54.35	67.85	49.68	8.4	143.07	10.82	45.86	16.63	2.49	4.83	3.7	0.85	3.34	2.8	6.47	2.95	11.91	2.79	9.21	4.7	10.26	5.19	2.11	532.57	141.8	20.18	942.59	3.03	36.47	1067	2.73	6.19	2.3	185.1
3262	5.24	61.93	38.31	1.94	16.39	9.07	5.21	54.1	15.16	2.17	2.24	2.83	13.12	0.95	2.76	1.86	0.81	2.67	2.5	2.99	3.04	2.53	1.61	2.59	0.82	0.83	72.72	189.91	3.78	860.94	3.01	10.04	2172	1.47	6.66	2.09	60.47
3263
3264
3265	3.29	56.55	5.33	3.23	15.08	2.68	3.53	29.16	3.77	2.71	2.57	2.49	4.83	2.33	0.85	2.85	2.8	2.97	2.95	18.66	2.79	2.91	2.8	2.66	0.56	2.11	124.1	188.96	3.3	676.26	3.03	10.79	596.67	2.41	5.79	2.06	6.94
3266	94.58	141.08	12.87	19.94	25.6	26.59	11.86	1949.57	1.89	19.15	0.13	0.28	2.25	0.49	0.27	2.53	0.5	10.89	0.35	11.95	0.33	0.09	0.56	16.12	0.48	0.14	1204.29	344.52	3.72	1658.1	77.6	42.76	8330.13	8.16	6.81	0.53	269.37
3267
3268
3269	8.17	146.94	58.84	0.61	32.22	9.37	8.26	16.24	9.19	6.97	54.79	16.83	6.64	1.51	0.76	0.28	1.24	38.01	4.68	193.97	1.3	1.35	1.95	3.69	1.11	0.7	225.47	381.37	4.02	151.75	55.92	236.33	1569.42	6.74	50.09	1.1	109.44
3270
3271	13.72	30.82	32.3	1.94	36.46	33.41	2.93	343.45	25.74	2.8	2.24	2.83	26.54	0.95	2.76	1.86	0.86	2.67	3.34	5.01	3.04	2.53	1.61	2.59	0.82	0.83	80.13	91.62	5.7	482.92	3.01	16.51	4202	2.1	5.51	2.09	15.17
3272	2.94	4.29	3.33	2.5	2.62	4.14	13.76	1.08	2.25	16.09	1.52	1.61	1.88	1.25	1.67	1.94	0.66	0.42	0.76	0.01	2.26	1.02	2.49	1.87	1.55	1.26	2.47	111.69	3.23	217.03	2.66	1.51	156.18	0.39	0.63	1.61	0.98
3273	20.17	3.96	4.93	23.92	6.02	6.25	2.01	7.22	0.97	57.3	2.57	2.49	4.83	2.33	0.85	2.85	2.8	2.97	2.95	7.77	2.79	2.91	2.8	36.96	12.66	2.11	75.02	69.84	3.3	760.16	3.03	19.42	189.17	2.41	2.68	2.06	81.93
3274
3275	14.67	139.68	62.73	0.61	52.08	113.43	12.55	178.02	22.66	8.85	18.33	1.43	7.34	1.51	0.76	2.06	1.62	4.41	0.72	25.32	1.3	16.58	11.31	2.17	3.99	3.11	455.51	238.55	38.54	243.17	47.38	78.09	402.11	4.45	29.04	4.09	68.34
3276	1407	238	40.5	55	24	45	28.5	9839	56	45	38	20	19	27	12.5	46.5	22.5	51.5	19	227	63.5	19	53.5	41.5	26.5	24.5	927	2269.5	22.5	998	72.5	76.5	10135.5	134	142	17	365.5
3277	90.92	24.99	56.1	1.94	34.93	34.94	12.8	950.98	31.6	5.93	2.24	2.83	30.42	0.95	2.76	1.86	1.26	2.67	5	158.56	3.04	2.53	1.61	3.99	0.82	0.83	777.13	540.16	33.6	1360	256.48	61.02	12630	4.82	12.67	2.09	134.42
3278	7.95	15.85	16.62	1.94	8.76	69.06	12.45	24.84	3.65	2.17	2.24	2.83	3.03	0.95	2.76	1.86	0.75	2.67	2.5	3.11	3.04	2.53	1.61	2.59	0.82	0.83	201.48	178.13	2.57	884.43	3.01	25.09	817.77	1.39	13.09	2.09	8.81
3279	6.15	7.79	3.33	2.5	2.62	2.13	2.28	1.08	2.25	28.46	1.52	1.61	1.88	1.25	1.67	1.94	0.66	0.42	0.76	1.28	2.26	1.02	1	1.87	1.55	1.26	57.7	121.5	3.23	887.76	2.66	69.2	161.71	0.39	0.28	1.61	34.21
3280	4.55	33.75	50.24	11.96	4.31	2.68	5	54.86	1.86	14.12	2.57	2.49	4.83	2.5	0.85	2.85	2.8	2.97	2.95	7.84	2.79	2.91	2.8	18.19	0.56	2.11	115.86	58.22	8.15	646.46	3.03	13.11	673.93	2.41	2.1	2.06	42.96
3281
3282	10.9	19.45	26.44	1.94	13.7	17.28	3.61	168.67	4.48	2.17	2.24	2.83	13.83	1.84	2.76	1.86	0.75	2.67	2.5	8.09	3.04	2.53	8	2.59	0.82	1.29	130.95	96.28	2.57	625.2	3.01	10.04	1872	1.39	9.21	2.09	56.55
3283
3284	7.07	43.72	43.57	0.61	28.23	28.57	7.78	366.95	7.24	7.68	1.14	1.43	14.32	1.51	0.76	0.28	1.24	1.42	0.4	5.85	1.3	1.35	1.95	2.38	1.11	0.7	129.59	126.85	5.22	1092.26	1.98	11.07	1620.84	4.22	2.78	1.1	75.74
3285	61.65	18.14	1.36	0.67	1.42	1.53	1	0.64	0.1	0.18	0.13	0.28	2.25	0.4	101.27	2.53	0.5	0.26	0.35	0.45	62.07	0.09	0.56	0.4	0.48	0.14	7.95	1.08	1.77	0.13	22.91	7.53	0.18	0.15	0.39	0.53	0.83
3286	26.13	5.31	11.63	3.23	11.24	2.68	2.01	100.43	4.56	4.46	2.57	2.49	4.83	2.33	0.85	2.85	2.8	2.97	2.95	8.16	2.79	2.91	2.8	2.76	1.92	2.11	90.59	33.69	5.24	879.21	3.03	14.86	3240	2.41	6.65	2.06	13.61
3287	438.05	117.89	14.47	2.5	46.75	70.44	26.72	1065.98	21.89	20.14	5.24	1.61	1.88	1.25	1.67	1.94	0.66	0.42	0.76	26.1	2.26	5.07	1	3	1.55	1.26	3070.15	447.92	16.23	1935.5	36.35	61.68	10860	1.43	10.59	1.61	126.22
3288
3289
3290	18.47	19.2	82.1	125.53	11.24	5.95	2.78	7.22	1.26	41.4	2.57	2.49	4.83	2.33	0.85	2.85	2.8	22.94	2.95	5.39	2.79	2.91	2.8	75.77	28.02	54.92	46.65	66.52	7.1	617.18	3.9	74.91	210.14	2.41	4.43	2.06	335.18
3291
3292	62.53	17.5	83.35	59.11	631.18	17.41	10.29	144.5	12.1	28.18	5.25	2.49	4.83	2.43	0.85	2.85	2.8	13.86	2.95	26.67	2.79	2.91	2.8	20.86	1.39	2.11	363.16	91.58	11.37	618.85	8.91	52.6	2854	2.41	6.52	2.06	215.26
3293	3.29	10.81	4.93	3.23	4.31	7.17	2.2	118.73	1.45	0.96	2.57	2.49	4.83	2.33	0.85	2.85	2.8	2.97	2.95	18.82	2.79	2.91	2.8	2.66	0.56	2.11	80.84	88.81	3.3	628.55	40.37	2.82	1232	2.41	2.07	2.06	6.94
3294	2.94	3.13	5.38	2.5	2.62	20.21	2.95	34.71	2.25	1.41	1.52	1.61	1.88	1.25	1.67	1.94	0.66	0.42	0.76	0.01	2.26	1.02	1	1.87	1.55	1.26	89.45	78.79	3.23	427.43	2.66	1.51	303.92	3.16	1.93	1.61	0.98
3295	139.05	158.15	10.24	13.2	60.87	15.93	13.52	999.26	17.1	20.22	114.31	1.61	25.08	1.25	1.67	1.94	0.67	10.75	0.76	8.31	2.26	27.41	1	4.9	9.57	1.44	4888.61	551.52	29.62	2149.93	12.48	27.28	10860	0.39	8.09	4.98	44.9
3296	2.94	4.16	20.88	2.5	2.62	14.51	2.28	24.32	2.25	17.18	1.52	1.61	1.88	1.25	1.67	1.94	0.66	0.42	0.76	0.01	2.26	1.02	1	1.87	1.55	2.02	161	171.64	3.23	693.48	30.42	1.51	204.5	2.5	1.48	1.61	0.98
3297	169.36	359.6	13.22	2.5	29.2	8.84	79.41	1296.3	23.82	7.1	1.52	1.61	1.88	1.25	1.67	1.94	0.66	0.42	0.76	43.93	2.26	8.02	1	1.87	1.82	1.26	1511.13	448.25	10.63	1869.95	27.65	27.28	10860	2.43	5.55	1.61	48.39
3298	116.98	239.6	14.55	6.81	72.84	7.88	42.95	2037.96	12.23	22.85	0.13	0.28	2.25	0.82	0.27	2.53	0.5	30.24	22.44	16.42	0.33	0.09	0.56	125.51	16.95	0.14	349.94	483.45	8.02	2021.38	63.01	38.57	26180.8	2.98	6.61	4.73	139.58
3299	2.94	79.9	105.5	2.5	2.62	2.13	101.95	73.42	7.11	1.41	1.52	1.61	1.88	2.17	1.67	1.94	0.66	0.42	0.76	6.86	2.26	1.02	8.66	1.87	1.55	16.07	36.27	63.94	3.6	622.7	2.66	1.51	982.39	0.77	1.65	1.61	0.98
3300	234	333	28.6	0.47	84.7	29.54	157	995	47.97	27.1	207	0.32	26.29	3.05	0.61	2.69	1.23	6.24	0.14	14.7	0.32	16.4	65.76	3.31	9.5	7.23	5060	903	30.17	1184	28	64.69	7634	8.98	13.7	4.91	74.08
3301
3302	81.74	180.49	3.33	2.5	21.22	24.22	7.96	1165.46	2.25	13.61	2.32	1.61	6.65	1.25	1.67	1.94	0.66	1.26	0.76	15.65	2.26	13.54	1	1.87	1.55	1.26	2722.53	461.25	7.09	1843.68	14.07	12.61	10860	4.54	5.17	1.61	20.84
3303	55.11	108.55	10.85	0.67	19.04	8.79	22.4	1504.02	0.08	0.13	0.13	0.28	2.25	0.4	0.27	2.53	0.5	0.26	0.35	3.44	0.33	0.09	0.56	0.4	0.48	0.14	613.69	464.2	6.48	817.65	0.22	28.36	6240.14	3.03	5.07	0.53	2.28
3304
3305
3306
3307	2.96	7.34	6.62	1.94	13.7	30.83	2.64	4.07	4.91	2.17	2.24	2.83	2.82	0.95	2.76	1.86	0.75	2.67	2.5	2.99	3.04	2.53	1.61	10.98	0.82	0.83	18.76	150.82	2.57	535.95	3.01	10.6	410.74	1.39	6.72	2.09	2.47
3308	6.17	17.92	54.48	1.94	13.7	89.29	4.91	41.45	9.09	2.71	2.24	2.83	20.44	0.95	2.76	1.86	0.75	2.67	2.5	2.99	3.04	2.53	1.61	2.59	0.82	0.83	391.49	173.52	2.57	575.81	3.01	12.48	519.56	1.39	8.74	2.09	25.82
3309	190.44	26.17	1.36	0.67	12.71	32.13	8.69	720.07	26.36	0.13	0.13	0.28	2.25	0.4	0.27	2.53	0.5	0.26	0.35	2.05	0.33	0.09	0.56	0.4	0.48	0.14	231.65	290.87	1.77	2476.8	26.39	46.77	11192.1	0.47	5.54	0.53	18.19
3310
3311	47.57	65.91	123.71	0.61	341.88	71.89	36.22	214.88	62.29	58.13	64.39	1.43	58.74	2.69	0.81	35.81	2.13	10.71	5.23	14.12	2.2	19.08	24.41	19.34	13.29	7.86	296.47	96.37	50.48	605.67	15.99	45.45	3100.64	9.08	5.5	61.9	217.22
3312	13	38.8	29.87	1.94	18.98	15.2	2.64	41.1	7.17	5.25	2.24	2.83	70.85	1.29	2.76	1.86	0.75	3.43	2.75	29.08	3.04	2.53	1.61	2.59	0.88	0.83	192.94	177.88	2.57	615.82	3.01	15.29	1139	1.43	12.26	2.09	44.52
3313	2.94	34.94	3.33	2.5	2.62	2.13	13.29	1.08	5.07	26.13	1.52	1.61	1.88	1.25	1.67	1.94	0.66	0.42	0.76	0.54	2.26	1.02	1	1.87	1.55	1.26	150.52	117.47	3.23	704.69	2.66	1.51	723.76	0.39	1.82	1.61	54.14
3314	294.92	253.6	45.42	36.76	275.4	15.35	1734.14	1170.02	1058.81	31.93	129.6	0.47	193.69	38.97	0.27	2.53	0.5	3.27	0.35	35.94	3.14	0.09	688.36	58.49	0.48	1.84	362.97	320.52	24.06	713.23	45.55	34.55	20085	3.24	6.48	9.34	257.71
3315
3316	200.91	534.3	39.02	17.49	15.06	49	13.14	1043	22.01	4.59	2.24	2.83	23.47	0.95	2.76	1.86	0.75	2.67	2.5	5.08	3.04	2.53	1.61	2.59	0.82	0.83	289.34	341	3.29	378	3.01	11.14	12630	1.58	5.51	2.09	30.03
3317	13.92	26.71	9.88	3.23	16.07	6.25	2.43	194.26	6.54	7.32	2.57	2.49	4.83	2.33	0.85	2.85	2.8	2.97	2.95	49.23	2.79	2.91	2.8	3.24	0.56	2.11	174.64	34.88	3.3	672.03	3.03	10.42	2101	2.41	7.43	2.06	6.94
3318	14.67	118.05	63.34	0.61	49.45	50.38	14.94	45.54	14.75	4.29	1.14	5.85	34.2	1.51	0.76	0.28	1.24	4.77	0.96	21.46	1.3	2.28	10.25	2.52	1.11	0.7	249.04	265.36	9.44	608.06	48.62	130.38	2418.58	4.57	21.42	1.1	61.89
3319	173.17	50.74	5.77	0.67	16.9	30.8	8.69	2661.11	0.08	19.36	0.13	0.28	2.25	0.58	0.27	2.53	0.5	0.26	0.35	4.23	0.33	0.09	0.56	0.4	0.48	0.14	376.94	152.56	3.05	1530.99	23.85	25.91	18419.9	6.9	7.27	0.53	271.11
3320	19.23	77.82	44.64	0.61	38.88	26.04	9.88	173.99	36.14	8.85	72.64	11.85	58.74	4.43	1.06	19.59	2.68	31.62	0.96	77.61	2.07	27.08	29.83	1.72	20.51	4.68	161.69	231.12	63.38	425.56	63.57	100.96	816.72	2.06	33.59	14.89	36
3321
3322
3323	104.28	3.13	22.1	2.5	190.76	30.25	44.77	705.79	34.46	14.54	158.32	3.05	43.4	3.15	3.19	11.39	1.61	20.8	4.05	12.6	3.63	5.39	18.18	10.23	23.49	2.6	233.84	57.5	43.42	731.76	6.04	44.2	10031.3	4.62	4.93	14.06	124.39
3324
3325
3326	352.12	48.88	45.67	1.94	29.61	48.51	7.89	1256	23.6	5.25	2.24	2.83	83.51	0.95	2.76	2.3	1.16	2.67	6.83	77.07	3.04	2.87	1.61	3.39	0.82	0.83	305.3	144.88	19.09	1034	462.95	65.42	12630	4.29	3.11	2.09	114.78
3327	2.94	37.02	9.47	2.5	10.51	25.95	25.68	215.84	29.14	29.93	1.52	1.61	1.88	1.25	1.67	1.94	0.66	7.4	0.76	16.38	2.26	18.1	1	1.87	3.06	1.26	319.48	76.71	5.42	424.65	2.66	1.51	1112.27	1.43	3.55	1.61	116.99
3328
3329	3.29	35.56	4.93	3.23	6.84	2.68	2.01	62.42	1.45	0.96	2.57	2.49	4.83	2.33	0.85	2.85	2.8	2.97	2.95	30.63	2.79	2.91	2.8	2.66	0.56	2.11	95.24	58.51	3.3	647.45	14.45	10.97	738.28	2.41	1.96	2.06	6.94
3330	2.94	16.69	72.44	2.5	2.62	2.13	78.87	21.29	2.25	1.99	1.52	1.61	1.88	2.33	1.67	1.94	0.66	1.1	0.76	4.48	2.26	1.02	1	2.54	1.55	1.26	55.49	68.72	3.23	618.63	2.66	1.51	1234.29	0.39	0.5	1.61	19.62
3331
3332
3333	305.08	111.79	17.37	2.5	59.69	10.61	57.49	839.94	17.58	10.09	58.07	1.61	1.88	1.25	1.67	1.94	0.66	18.76	0.76	311.18	2.26	2.14	13.66	3.12	7.98	1.26	1198.23	730.86	90.83	4086.62	60.52	57.71	10860	1.74	13.52	1.97	84.02
3334	2.94	20.72	3.33	2.5	2.62	2.13	11.45	55.87	2.25	35.32	6.36	1.61	1.88	1.25	1.67	1.94	0.66	3.88	0.76	39.27	2.26	4.17	1	1.87	22.59	1.26	189.66	55.33	3.23	689.36	2.66	1.51	1614.52	0.58	1.22	1.61	87.63
3335	3.29	45.74	4.93	3.23	4.31	4.5	2.66	7.22	0.97	1.15	2.57	2.49	4.83	2.33	0.85	2.85	2.8	2.97	2.95	2.68	2.79	2.91	2.8	2.66	0.56	2.11	32.45	191.45	3.3	246.25	3.03	3.04	406.72	2.41	2.31	2.06	6.94
3336	2.94	9.58	3.33	2.5	2.62	2.13	2.28	11.54	2.25	20.61	1.52	1.61	1.88	1.25	1.67	1.94	0.66	0.42	0.76	4.81	2.26	1.02	1	1.87	1.55	1.26	17.66	55.33	3.23	613.96	2.66	1.51	777	0.39	0.79	1.61	107.49
3337	15.43	55.6	56	0.61	62.45	45.81	13.91	449.85	12.67	25.67	4.47	47.41	30.88	1.51	0.76	0.28	1.24	91.28	1.79	104.04	1.3	1.35	6.18	3.39	1.11	0.92	3863.84	130.28	6.97	906.53	150.48	574.62	1819.85	5.16	62.05	1.1	50.96
3338
3339	30.66	68.16	3.33	2.5	2.62	4.14	2.28	447.3	9.04	14.39	1.52	1.61	1.88	1.25	1.67	1.94	0.66	0.42	0.76	0.52	2.26	1.37	1	1.87	36.07	1.26	788.48	281.61	3.23	777.2	7.43	1.51	1876.61	0.39	1.25	1.61	47.23
3340	220.89	20.92	11	0.67	68.56	45.85	211.44	2588.97	127.22	7.01	17.24	0.28	948.8	1.79	0.32	2.53	0.5	0.26	0.35	14.79	11.96	0.09	0.56	6.23	1243.03	0.14	1659.77	408.68	8.82	1050.71	0.17	60.52	11573.1	4.17	2.87	0.53	130.68
3341
3342	44.49	71	14.29	7.07	3.27	8.71	18.09	41.72	27.93	141.59	6.36	1.61	1.88	1.25	1.67	1.94	0.66	35.54	0.76	44.58	2.26	1.15	1	3.49	1.89	1.26	1708.83	230.32	3.23	1067.03	76.91	1.51	804.58	7.77	4.16	1.61	771.58
3343
3344
3345	2.94	37.85	5.81	2.5	2.62	14.79	66.7	19.09	2.25	3.34	3.79	1.61	1.88	1.25	1.67	1.94	2.88	1.22	0.76	1.5	2.26	2.14	1	1.87	3.33	1.26	308.01	137.39	6.1	607.72	2.66	1.51	675.46	0.39	0.79	1.61	29.38
3346
3347	260.68	16.2	26.44	1.94	8.03	20.42	3.89	1393	8.12	2.17	2.24	2.83	9.01	0.95	2.76	1.86	0.75	2.67	2.5	18.57	3.04	2.53	1.61	2.59	0.82	0.83	590.64	121.78	2.57	899.61	3.01	12.22	12630	3.3	3.13	2.09	23.7
3348	2.94	4.03	3.33	2.5	2.62	2.13	2.28	1.08	2.25	1.41	1.52	1.61	1.88	1.25	1.67	1.94	0.66	0.42	0.76	0.01	2.26	1.02	1	1.87	1.55	1.26	46.38	140.83	3.23	982.68	2.66	1.51	350.78	0.39	0.34	1.61	0.98
3349	6.4	23.14	53.7	0.61	71.36	65.09	11.54	230.2	40.39	6.8	2.6	1.43	21.22	1.51	0.76	0.28	1.24	1.17	0.91	9.43	1.3	36.12	1.95	4	1.11	6.89	2346.7	365.64	10.01	694.7	26.05	28.04	965.26	1.29	14.87	1.1	32.8
3350	235.73	6.68	73.19	35.51	18.98	28.24	10.9	999.54	12.58	18.42	2.24	2.83	19.69	0.95	2.76	1.86	0.75	2.67	2.5	8.36	3.04	5.12	1.61	2.59	1.79	0.83	631.76	126.51	15.75	1195	3.51	29.54	12630	3.25	6.39	2.1	129.6
3351	2.94	63.79	3.33	2.5	2.62	6.1	2.28	1.08	2.25	4.96	1.52	1.61	1.88	1.25	1.67	1.94	0.66	0.42	0.76	4.93	2.26	1.02	2.14	1.87	1.55	1.26	96.87	178.41	3.23	433.65	3.93	1.51	1034.54	0.39	2.91	1.61	18.4
3352	253.85	98.44	8.68	2.5	58.52	6.61	59.38	1251.49	11.96	5.73	1.52	1.61	1.88	1.25	1.67	1.94	0.66	0.42	0.76	36.8	2.26	1.43	22.06	1.87	1.55	1.26	488.01	178.83	12.47	2286.57	15.07	28.22	10860	0.39	6.09	1.61	36.61
3353	82.91	36.93	94.55	24.68	543	82.45	329	151	173	64.84	208	36.96	157	31.1	14.6	37.67	14.18	19.24	46.06	10.86	95.63	43.03	278	59.41	40.35	53.72	102	50.9	57.32	317	42.58	153	149	10.98	17.71	75.99	238
3354	3.29	3.96	8.99	3.23	11.24	11.43	2.01	140.26	1.86	1.96	2.57	2.49	4.83	2.33	0.85	2.85	2.8	2.97	2.95	23.51	2.79	2.91	2.8	2.66	1.08	2.11	178.99	71	3.3	1160	3.03	2.82	826.37	2.41	4.84	2.06	6.94
3355	9.89	29.92	7.47	2.5	2.62	2.13	316.93	1.08	2.25	4.54	1.52	1.61	1.88	1.25	1.67	1.94	1.8	0.42	0.76	0.85	2.26	1.02	1	1.87	1.55	1.26	59.22	152.66	3.23	549.92	2.66	1.51	880.54	0.39	2.1	1.61	150.84
3356	3.29	3.96	4.93	3.23	13.13	2.68	2.01	124.3	2.08	1.36	2.57	2.49	4.83	2.33	0.85	2.85	2.8	2.97	2.95	81.06	2.79	2.91	2.8	2.66	0.56	2.11	91.91	107.38	14.79	610.11	3.03	12.93	867.17	2.41	3.81	2.06	6.94
3357	3.67	36.65	38.9	15.18	55.99	77.43	7.78	336.82	7.79	1.42	1.14	1.43	3.24	1.51	0.76	0.28	1.24	26.2	1.01	169.54	1.3	1.35	1.95	1.65	1.11	1.59	250.52	80.53	4.02	460.17	75.58	235.91	1667.68	2.39	10.91	1.1	26.13
3358	2.96	14.26	17.7	1.94	12.32	27.2	4.91	101.4	8.12	2.17	2.24	2.83	5.84	0.95	2.76	1.86	0.75	2.67	2.5	2.99	3.04	2.53	1.61	2.59	0.82	0.83	132.86	234.05	2.57	595.39	3.01	14.79	589.09	1.39	7.22	2.09	25.82
3359	48.26	56.21	14.25	131.76	286.69	23.15	63.89	976.02	26.75	58.66	28.73	0.28	2.25	16.46	4.13	2.53	0.5	40.94	0.35	36.37	3.46	0.09	1.67	0.53	0.48	0.14	300.63	187.4	1.77	2662.98	126.32	88.45	10206.5	6.88	2.56	0.53	81.14
3360	5.5	55.06	4.36	0.61	11.31	14.45	5.33	12.93	6.7	2.83	1.14	2.47	6.64	1.51	0.76	0.28	1.24	4.47	0.4	49.8	1.3	1.35	1.95	1.65	1.11	0.7	125.93	289.91	4.02	811.61	12.71	96.85	1248.85	1.45	11.96	1.1	31.16
3361	60.33	64.47	27.41	2.5	49.11	192.12	54.51	939.32	12.65	19.36	10.77	1.72	4.28	1.29	1.67	1.94	0.66	11.27	0.76	14.19	2.26	18.48	36.14	18.5	3.17	1.38	1981.91	363.91	15.11	1566.17	240.48	19.08	8828.2	1.16	9.37	1.61	116.52
3362	321.66	530.37	52.49	73.39	46.71	31.24	113.6	2045.82	49.96	144.48	11.56	0.62	2.25	4.38	0.27	2.53	0.5	3.69	0.35	33.9	0.33	14.67	0.56	2.64	6.44	0.82	2334.89	532.19	14.22	4092.77	100.75	61.66	20941.8	6.44	6.58	0.53	171.37
3363
3364
3365	818	319	119	90.06	139	76.7	993	7262	98.81	640	166	5.19	38.85	31.27	3.21	5.29	2.3	32.04	3.8	735	6.18	7.74	143	15.75	0.04	20.37	3610	1216	102	5556	224	103	19895	20.52	20.27	2.1	530
3366	143.59	246.22	19.57	0.67	52.23	52.24	368.95	1580.62	107.32	21.11	0.13	52.72	2.25	0.85	0.27	2.53	0.81	14.31	0.35	2.17	3.57	19.84	0.56	1.28	0.48	0.23	1232.29	366.19	8.97	2641.78	45.55	50.62	11337	2.29	7.54	0.53	240.3
3367	15.72	23.96	16.87	31.58	2.62	7.65	6.34	4.33	2.25	263.9	1.52	1.61	4.96	1.25	1.67	1.94	0.66	1.84	0.76	50.62	17.88	7.09	1	87.78	11.1	6.92	323.28	86.55	3.23	1102.38	73.56	1.51	682.87	3.41	0.85	1.61	755.03
3368	11.53	79.91	36.25	0.61	38.88	10.51	15.46	43.98	8.35	2.3	1.14	3.28	8.06	1.51	0.76	0.28	1.24	8.53	0.54	90.47	1.3	1.35	1.95	2.31	1.11	0.7	345.3	135.72	4.02	1057.42	153.03	320.01	938.23	2.28	41.22	1.1	24.41
3369
3370	21.95	40.56	48.14	1.94	41.35	24.08	8.05	276.43	33.73	9.12	6.85	3.31	86.66	3.01	3.33	16.15	1.92	6.22	7.52	39.37	3.04	7.6	21.1	4.61	6.95	2.94	265.39	90.17	18.44	553.54	5.43	34.18	3266	1.89	3.64	6.41	94.02
3371	3.29	10.41	4.93	3.23	4.48	2.68	2.01	95.3	1.86	1.22	2.57	2.49	4.83	2.33	0.85	2.85	2.8	2.97	2.95	4.01	2.79	2.91	2.8	2.66	0.56	2.11	18.42	44.64	3.3	458.15	3.03	9.33	1469	2.41	1.99	2.06	6.94
3372	2.94	14.08	32.75	2.5	2.62	23.36	47.47	12.42	10.6	1.65	1.52	1.61	1.88	1.25	1.67	1.94	0.66	6	0.76	0.53	4.14	3.91	10.28	6.83	1.55	1.26	282.12	156.8	3.23	928.78	2.66	1.51	425.56	0.39	4.09	1.61	0.98
3373
3374	352.73	41.09	48.14	1.94	34.41	31.35	8.22	1081	26.8	5.82	2.24	2.83	47	0.95	2.76	1.86	0.93	2.67	9.48	364.71	3.04	2.53	1.61	2.59	0.82	0.83	500.21	265.86	27.07	1007	17.42	49.84	12630	7.63	8.29	2.09	165.04
3375
3376	8.3	7.01	22.75	1.94	13.7	6.14	2.64	116.44	2.93	2.17	2.24	2.83	2.82	0.95	2.76	1.86	0.75	2.67	2.5	2.99	3.04	34.25	1.61	2.59	0.82	0.83	82.44	69.46	2.57	654.2	3.01	4.36	1142	1.39	5.89	2.09	2.47
3377	64.58	58.14	62.83	23.27	60.87	6.61	27.76	65.81	39.28	63.49	43.35	4.43	10.91	6.37	1.67	1.94	7.81	16.14	1.53	22.87	2.26	1.3	32.65	39.62	11.88	6.78	676.78	215.15	3.98	1116.46	44.74	10.61	1107.02	6.74	7.4	9.73	416.69
3378	3.29	34.15	4.93	3.23	11.24	2.68	2.01	64.56	4.03	6.27	8.9	2.49	4.83	2.33	0.85	2.85	2.8	2.97	2.95	11.19	2.79	2.91	2.8	2.66	3.25	2.11	32.27	44.95	19.26	714.91	3.03	6.74	509.25	2.43	3.08	2.06	12.45
3379
3380	2.94	18.85	3.33	2.5	2.62	2.13	89.64	28.57	2.25	1.41	19.93	1.61	1.88	1.25	1.67	1.94	0.66	2.75	0.76	1.94	2.26	1.02	1	1.87	5.98	1.26	41.08	135.72	9.51	722.34	2.66	1.51	326.82	0.39	0.5	1.61	0.98
3381	285	79.06	36.36	0.47	103	117	390	2776	87.48	21.29	158	0.12	29.54	3.48	3.15	0.6	0.38	3.74	0.14	31.48	2.48	31.13	75.21	4.89	0.04	4.5	5669	297	20.75	2057	30.96	77.08	10700	4.21	20.82	0.28	102
3382
3383	2.94	39.72	3.33	2.5	2.62	2.13	3.76	24.75	2.25	2.77	1.52	1.61	1.88	1.25	1.67	1.94	0.66	0.42	0.76	12.98	2.26	1.02	1	1.87	1.55	1.26	66.42	122.43	3.23	607.13	100.68	1.51	848.33	0.39	0.68	1.61	81.42
3384	122	64.47	151	75.47	889	13.72	537	213	296	120	305	70.13	303	52.6	27.64	53.91	24.88	30.04	42.23	23.08	158	67.97	438	127	84.85	89.29	154	73.84	82.63	511	63.14	233	282	17.4	32.69	115	316
3385
3386	3.29	23.08	27.95	3.23	4.31	3.68	5.85	173.27	1.08	1.22	2.57	2.49	4.83	2.33	0.85	2.85	2.8	2.97	2.95	2.68	2.79	2.91	2.8	2.66	0.56	2.11	54.62	110.09	8.83	542.24	3.03	3.04	315.83	2.41	3.2	2.06	6.94
3387	2.94	54.87	8.48	2.5	2.62	7.39	2.28	1.08	2.25	11.31	1.52	1.61	1.88	1.25	1.67	1.94	2.94	0.42	0.76	0.03	2.26	1.02	1	1.87	1.55	1.26	167.72	150.64	3.23	875.65	10.51	1.51	220.46	0.39	0.65	1.61	33.01
3388	2.94	54.39	4.52	2.5	3.27	2.13	2.28	2.5	2.25	17.49	1.52	1.61	1.88	1.25	1.67	1.94	0.66	0.42	0.76	0.55	2.26	1.02	1	1.87	1.55	1.26	52.08	145.63	3.23	868.51	2.66	1.51	1776.08	0.39	0.88	1.61	103.61
3389
3390	84.9	164.07	16.36	0.67	47.82	20.61	18.46	1702.96	3.89	6.2	0.13	0.28	2.25	0.82	0.27	2.53	1.24	5.04	0.35	4.01	0.33	0.09	2.68	1.23	7.9	0.14	439.4	504.07	8.82	928.3	25.9	71.44	14080.8	7.4	5.99	0.53	116.64
3391
3392
3393
3394
3395	155.11	35.87	10.53	0.67	16.9	28.47	10.51	2087.11	30.2	40.39	0.13	0.28	2.25	1.52	0.27	2.53	0.5	0.26	0.35	10.89	0.33	0.09	0.56	0.4	0.48	0.14	403.64	159.4	2.58	1007.12	46.85	52.49	23603.7	4.76	6.23	0.53	327.12
3396	132	70.28	160	93.45	1024	0.5	475	243	362	127	418	86.09	376	61.13	36.74	16.74	30.61	35.68	75.8	27.24	204	87.7	468	175	114	125	176	82.73	83.77	589	75.43	274	352	21.2	30.99	152	327
3397	75.37	16.79	14.36	1.94	13.7	4.09	2.64	624.95	2.93	2.17	2.24	2.83	2.82	0.95	2.76	1.86	0.75	2.67	2.5	65.95	3.04	2.53	1.61	2.59	0.82	0.83	151.35	66.28	2.57	361.54	25.01	4.36	9366	1.39	3.73	2.09	2.47
3398	131	57.57	109	109	144	37.75	111	1464	21.59	247	110	0.48	19.11	19.38	4.49	0.39	0.67	94.62	0.14	26.95	0.1	16.74	47.64	93.49	0.04	11.2	3575	226	18.69	1310	89.96	130	3387	31.39	18.11	0.28	341
3399	3.07	22.13	18.76	1.94	7.3	18.33	3.2	49.96	5.8	2.51	2.24	2.83	4.1	0.95	2.76	1.86	0.75	2.67	2.5	6.15	3.04	2.53	1.61	2.59	3.65	0.83	104.02	250.04	2.57	418.84	3.01	15.78	719.57	1.39	7.28	2.09	19.44
3400	83.55	43.08	108	38.82	723	29.13	337	165	219	61.5	216	42.93	203	31.52	19.14	53.91	13.72	18.33	43.6	11.81	106	46.25	265	79.26	52.47	62.54	100	56.91	66.25	324	45.32	199	182	9.85	20.11	77.33	222
3401	40.56	121.66	152.71	28.06	870.62	49.96	67.76	58.94	189.67	122.31	1.14	14.7	9.55	1.51	0.76	0.28	1.62	57.5	3.92	85.5	1.3	36.7	2.4	14.02	11.2	2.06	232.27	176.7	26.9	1113.01	63.58	175.37	669.37	4.92	33.9	1.1	656.17
3402
3403	303.8	356.69	11	0.67	7.76	9.2	21.17	1590.51	28.67	9.44	0.13	0.28	2.25	0.98	0.27	2.53	0.5	0.26	0.35	30.73	0.33	0.09	0.56	0.66	0.48	0.14	273.27	451.86	1.77	1426.76	86	65.29	30682.9	9.82	5.58	0.53	139.58
3404	2.94	79.95	3.33	2.5	2.62	5.1	7.14	3.57	2.25	1.41	1.52	1.61	1.88	1.25	1.67	1.94	0.66	0.42	0.76	0.01	2.26	1.02	1	1.87	1.55	1.26	45.27	251.81	3.23	768.64	2.66	1.51	146.57	0.39	0.52	1.61	0.98
3405	2.94	69.76	3.33	2.5	2.62	2.13	12.36	172.59	57.95	1.41	1.52	1.61	1.88	1.25	1.67	1.94	0.66	0.42	0.76	0.21	2.26	1.02	1	1.87	1.55	1.26	12.7	106.51	3.23	766.26	10.16	1.51	2688.03	0.39	0.28	1.61	0.98
3406	277.39	85.38	14.55	0.67	56.62	10.65	8.18	1525	72.31	8.95	40.07	0.28	2.25	0.87	0.53	2.53	0.5	7.55	0.35	57.24	1.54	0.09	7.19	17.92	4.84	0.55	351.51	169.03	15.15	1044.6	18.93	51.56	26166.5	1.68	6.7	1.11	349.62
3407	13.92	50.38	14.18	4.45	19.11	18.5	21.53	200.09	58.61	15.16	189.56	2.49	47.22	2.33	0.85	58.1	7.42	12.55	2.95	26.64	2.79	2.91	2.8	2.66	48.05	2.11	195.08	175.52	113.63	637.53	3.03	17.42	1596	7.81	5.43	35.49	49.35
3408
3409	138	82.3	170	86.48	922	0.82	620	240	368	153	411	89.47	371	63.35	28.06	21.84	29.02	39.75	34.8	29.42	218	90.15	536	157	103	130	182	78.03	85.36	610	74.62	274	312	23.01	38.58	156	369
3410	2.94	3.13	3.33	2.5	2.62	2.13	2.28	1.08	2.25	1.41	1.52	1.61	1.88	1.25	1.67	1.94	0.66	0.42	0.76	0.01	2.26	1.02	1	1.87	1.55	1.26	25.36	117.49	3.23	442.1	2.66	1.51	88	0.39	0.28	1.61	0.98
3411	100.57	287.01	26.44	0.67	156.49	18.18	475.37	1578.6	38.45	66.18	4.23	0.28	2.25	4.17	0.27	2.53	0.57	0.3	0.35	17.77	1.06	0.09	0.56	8.63	0.48	0.14	447.11	387.01	12.62	4077.24	61.71	34.93	16656.4	6.95	5.31	0.53	77.03
3412
3413
3414	255	24.5	32.18	3.98	150	48.18	59.32	3160	50.67	11.79	182	1.26	24.14	3.14	2.88	2.62	0.66	7.29	2.57	24.11	0.1	3.59	25.95	4.64	4.42	6.76	3371	160	32.29	1387	40.81	94.01	14502	1.74	9.44	5.11	169
3415	2.94	42.95	3.33	2.5	4.89	37.11	2.28	9.77	12.88	4.27	1.52	1.61	1.88	1.25	1.67	1.94	0.66	0.42	0.76	2.66	2.26	4.17	7.31	1.87	1.55	1.26	147.89	150.54	3.23	600.27	3.27	1.51	625	0.39	3.28	1.61	15.35
3416	71.11	52.19	5.38	2.5	51.46	5.6	4.82	577.57	5.87	1.43	1.52	1.61	1.88	1.25	1.67	1.94	0.66	0.42	0.76	2.36	2.26	1.02	1	1.88	1.69	1.26	76.33	134.79	11.17	607.52	2.66	7.1	7200.2	0.39	1.91	1.61	6.47
3417	38.55	22.09	77.42	23.78	475	29.13	206	124	164	35.48	138	22.53	102	20.47	12.49	9.28	10.26	12.09	31.58	6.74	61.82	24.56	162	46.84	31.38	33.24	74.03	46.23	50.32	282	30.96	142	125	6.74	13.25	52.2	161
3418	2.94	44.18	3.33	2.5	2.62	6.87	2.28	1.08	2.25	1.41	1.52	1.61	1.88	1.25	1.67	1.94	0.66	0.42	0.76	0.11	2.26	1.02	1	1.87	1.55	1.26	162.11	151	3.23	817.58	2.66	1.51	2.28	0.39	1.93	1.61	0.98
3419
3420	35.89	0.81	53.62	0.47	259	29.13	166	82.58	90.85	25.42	57.14	10.56	56.45	11.49	4.55	1.56	4.19	5.37	14.74	0.19	30.97	9.86	71.78	24.06	12.33	13.79	40.47	26.07	40.6	187	14.79	98.47	59.11	3.21	7.51	23.91	101
3421
3422	377.44	17.13	62.74	1.94	29.61	32.89	11.76	1078	39.55	6.16	2.24	4.19	205.32	0.95	2.76	17.17	0.75	3.89	7.75	304.02	3.04	8.86	1.61	2.59	0.82	0.83	289.73	134.5	34.06	813.67	3.01	59.98	12630	43.09	3.76	2.09	339.6
3423	254.65	66.72	40.82	7.82	95.47	143.44	340.88	1489.5	50.7	24.89	22.87	7.33	8.72	1.85	1.67	1.94	0.66	6	0.76	14.31	12.84	14.38	66.26	3.12	2.98	2.48	2805.75	216.55	15.56	2451.41	2054.2	25.14	10860	0.39	12.18	1.61	288.16
3424
3425	655.28	306.38	65.61	7.24	46.42	45.54	27.46	1791	52.54	20.3	34.04	3.44	149.99	0.95	2.76	1.86	3.9	7.06	13.04	369.98	3.04	10.7	21.91	4.3	1.7	1.37	5761	2021	20.66	1023	26.7	114.33	12630	5.46	25.03	2.09	334.56
3426	3.29	17.5	12.49	3.23	23.28	4.5	3.66	13.25	7.73	2.45	2.57	2.49	4.83	2.33	0.85	2.85	2.8	2.97	2.95	2.68	2.79	2.91	2.8	2.66	0.56	2.11	62.01	161.58	3.3	577.08	3.03	16.58	1305	2.41	6.32	2.06	35.31
3427
3428	3302	6313	90.5	480.5	21	55	159	9366	39	565	35	19	16	24	25	66.5	25	469	15.5	1860.5	31	27	40	55	368	27	1660	8335	28	1611.5	425	53	6981	243	353	21	175.5
3429	800.05	39.63	76.04	0.61	187.88	21.43	11.71	1264	68.03	9.49	13.97	1.43	54.75	1.51	0.76	0.28	1.24	3.37	1.73	51.1	1.3	146.98	6.67	2.66	1.11	19.42	5541.95	237.2	25.91	743.77	3.61	28.18	9893.03	16.43	15.82	1.1	243.27
3430	60.84	44.05	8.48	2.5	6.66	8.18	1005.36	1122.64	32.53	4.96	1.52	1.61	1.88	1.25	1.67	1.94	0.66	0.42	1.37	4.36	2.26	1.02	28.65	1.87	1.55	1.26	1712.33	169.35	5.42	2532.91	2.66	9.6	5815.88	0.39	3.28	1.61	20.84
3431	2.94	15.91	3.33	2.5	2.62	2.13	2.28	12.42	2.25	3.47	1.52	1.61	1.88	1.25	1.67	1.94	0.66	0.42	0.76	0.64	2.26	1.02	1	1.87	1.55	1.26	55.04	69.87	3.23	521.71	2.66	1.51	644.84	0.39	0.71	1.61	15.96
3432	392	399	39.89	0.47	158	52.5	157	1180	18.23	16.33	31.53	0.07	11.26	3.43	4.36	0.99	0.49	0.68	0.89	10.7	0.1	0.84	29.71	8.15	0.04	1.34	556	342	27.34	2291	62.91	90.01	2932	30.32	8.79	0.28	111
3433	375.36	25.13	23.29	2.5	102.22	35.97	38.33	1401.07	32.05	15.08	97.22	2.16	3.22	1.25	1.67	2.01	0.66	9.32	0.76	28.86	2.26	5.9	6.65	2.89	11.68	1.38	1479.79	95.26	42.06	1383.75	11.44	37.84	10860	3.35	6.63	7.81	168.28
3434	3.88	29.57	43.98	3.23	61.07	69.54	16.56	75.69	21.01	9.27	5.4	2.49	17.94	5.16	0.85	5.45	2.8	3.84	2.95	2.68	2.79	2.91	13.2	5.64	1.08	2.85	416.55	186.73	13.13	609.44	3.03	44.76	450.66	2.41	7.88	2.6	44.03
3435	308	222	19.56	16.62	66.62	49.69	506	3048	25.77	13.26	12.99	0.07	4.14	1.15	2.17	0.39	0.38	0.6	0.14	8.48	0.1	0.05	5.11	24.5	0.04	0.23	703	375	13.93	1515	15.92	66.38	9766	1.75	6.39	0.28	97.16
3436	3.29	7.07	4.93	3.23	6.02	4.22	2.01	81.21	3.77	3.24	2.57	2.49	4.83	2.33	0.85	2.85	2.8	2.97	2.95	2.68	2.79	7.78	2.8	2.66	0.56	2.11	440.39	37.75	3.3	694.71	3.03	4.51	983.44	2.41	11.03	2.06	6.94
3437	2.94	17.57	37.9	2.5	2.62	2.38	8.38	6.76	2.25	77.49	1.52	1.61	1.88	1.54	1.67	1.94	0.66	0.42	0.76	7.68	2.26	1.02	1	1.87	1.55	1.26	70.01	105.49	3.23	795.72	82.06	1.51	453.53	0.39	0.74	5.98	20.84
3438	17.46	35.19	79.31	1.94	62.76	58.71	18.98	262.61	94.73	21.94	13.02	3.06	105.44	5.55	2.76	58.16	4.8	2.67	3.34	14.47	3.04	2.53	40.18	2.59	60.78	3.86	112.79	67.2	70.9	463.36	4.34	42.93	4038	1.39	7.19	92.41	186.53
3439	1522	2610	58.5	276	29	98	257	7501	83	246	59	34.5	23	23	30	64	33	63	38.5	449	755.5	48	56.5	70	24	47	1611	7446	26	1032.5	699	73	8093	105	166	32	400.5
3440	8.1	22.71	15.68	2.5	2.62	142.07	2.28	68.6	17.58	19.83	1.52	1.61	1.88	1.64	1.67	1.94	1.84	4.18	78.89	7.07	2.26	1.02	24.41	3.74	47.76	1.8	275.17	119.49	3.23	1033.6	26.03	1.51	353.29	4.69	7.79	1.61	229.63
3441
3442	666	401	46.42	14.38	223	280	184	1954	125	30.09	236	21.83	98.35	5.54	1.63	5.81	0.67	51.65	1.63	1773	2.61	31.99	95.22	7.32	0.94	6.61	17850	6611	75.13	4262	217	288	14345	6.03	33.59	2.99	182
3443	27.29	114.32	111.01	0.61	489.42	67.5	25.86	68.01	241.84	80.59	70.96	5.91	102.63	8.91	1.59	15.82	7.74	20.55	1.91	18.45	25.21	16.02	76.43	54.37	11.93	14.62	283.43	124.94	35.71	1234.19	18.44	59.41	448.32	5.06	10.57	9.08	437.57
3444	304.5	129	51	283	17	181	31	10752	53	33	30	20.5	17.5	17.5	23	61	13	31	16	396.5	34	28	22	20.5	12	31	3085	1234	25.5	424.5	180	49.5	9077	216	77	21	24
3445	361.11	81.53	74.03	1.94	58.93	100.04	19.34	727.43	76.87	11.68	2.24	2.83	75.61	1.29	2.76	15.31	3.14	2.67	4.54	18.75	3.21	2.53	5.76	3.59	10.88	1.29	249.59	199.41	52.13	2662	8.84	27.84	12630	6.52	10.34	32.91	193.45
3446	20.5	14.45	25.09	3.23	24.34	9.42	4.73	145.91	14.04	6.9	11.01	2.49	4.83	2.63	0.85	5.21	2.8	2.97	2.95	8.42	2.79	2.91	2.8	2.66	6.74	2.11	103.61	79.27	29.56	689.22	3.03	11.15	2134	2.41	4.75	5.47	26.31
3447
3448	2.94	21.42	3.33	2.5	19	11.16	2.28	1.08	13.81	4.96	4.4	1.61	1.88	1.25	1.67	1.94	0.66	0.42	0.76	1	2.26	3.24	1	4.12	1.55	1.26	256.94	234.64	3.23	532.29	2.66	1.51	318.95	0.39	6.02	1.61	15.96
3449	16.3	33.47	40.41	1.94	31.78	53.89	7.4	233.17	21.48	5.48	2.24	2.83	32.77	0.95	2.76	1.86	4.03	2.67	4.31	2.99	3.04	2.53	1.61	4.61	0.82	0.83	374.34	204.03	8.82	809.6	3.01	18.63	1365	1.39	8.06	2.09	64.36
3450
3451	232.06	455.22	12.09	0.67	1.42	6.41	11.86	1172.22	32.86	21.88	0.13	0.28	2.25	0.4	0.27	2.53	0.5	3.2	0.35	17.23	2.32	0.09	0.56	0.81	0.48	0.14	375.47	371.97	5.17	1653.09	45.55	52.49	22743.6	5.2	2.17	0.53	183.16
3452	98.16	35.26	12.09	62.07	26.7	18.51	52.56	1998.94	75.16	40.73	0.13	0.28	2.25	4.03	0.27	2.53	0.5	61.12	0.35	15.59	0.33	0.09	0.56	54.07	75.21	0.14	272.17	102.59	5.17	1051.38	12.43	81.92	9387.86	5.24	6.1	0.53	229.89
3453
3454
3455
3456	238.05	62.48	55.56	1.94	39.91	75.48	9.55	933.36	33.2	12.42	2.24	2.83	29.64	0.95	2.76	3.85	1.29	2.67	2.83	11.37	3.04	2.53	1.61	3.2	2.64	0.83	495.98	288.95	33.48	1482	7.9	30.1	12630	4.61	6.63	9.91	111.4
3457	2.94	12.9	3.33	2.5	2.62	2.13	2.28	1.08	2.25	19.52	1.52	1.61	1.88	1.25	1.67	1.94	0.66	0.42	0.76	5.53	2.26	1.02	1	1.87	15.6	1.26	25.36	100.8	3.23	557.63	2.66	1.51	805.71	0.39	0.28	1.61	107.49
3458	3.29	68.65	4.93	3.23	4.48	2.68	2.43	7.22	2.77	1.36	2.57	2.49	4.83	2.33	0.85	2.85	2.8	2.97	2.95	3.36	2.79	2.91	2.8	2.66	0.56	2.11	42.85	169.08	3.3	489.6	3.03	7.49	562.05	2.41	3.05	2.06	8.98
3459	62.07	21.05	79.04	15.31	429	70.14	221	122	145	44.11	131	21.03	119	21.02	11.54	30.14	8.02	11.37	6.34	7.28	67.25	27.31	129	41.55	30.71	28.65	76.47	44.16	52.92	241	28.22	147	126	7	13.02	45.31	136
3460
3461	33.4	0.81	51.73	0.47	239	42.64	137	83.02	79.22	16.98	69.66	11.43	72.3	11.78	5.25	0.39	4.19	5.32	10.29	0.99	15.62	12	79.49	18.26	10.2	13.14	42.08	27.24	35.97	158	12.23	98.47	67.45	2.34	5.86	24.53	89.34
3462	3.06	67.28	33.31	0.61	93.55	53.27	7.62	90.28	12.97	2.99	1.14	13.16	3.24	1.51	0.76	0.28	1.24	21.8	5.44	341.21	1.3	1.35	2.21	3.24	1.11	0.7	157.48	110	8.85	809.78	103.6	147.58	614.77	3.5	22.69	1.1	29.51
3463	263.73	16.55	44.4	1.94	22.7	43.05	14.72	1197	28.94	3.31	2.24	2.83	37.49	0.95	2.76	1.86	0.76	2.67	6.68	109.02	3.04	2.53	1.61	2.63	0.82	0.83	367.23	127.68	15.75	1446	1205	5.02	12630	3.48	3.7	2.09	146.96
3464	126.5	47.88	21.55	0.67	52.23	29.36	279.07	1896.78	16.17	62.53	0.13	0.28	2.25	1.34	0.27	2.53	3.37	1.78	0.35	25.2	0.33	0.09	0.56	0.53	0.48	0.14	414.59	151.69	11.57	2299.29	71.24	60.24	12107.6	4.97	4.85	0.53	67.89
3465	39.34	70.01	62.73	0.61	38.88	34.48	7.78	50.21	14.15	9.85	1.14	3.28	7.7	1.51	0.76	0.28	1.24	41.94	1.38	55.01	1.3	3.34	1.95	3.31	1.11	3.02	800.76	160.73	9.44	475.51	45.2	145.78	673.94	8.87	21.74	1.1	193.48
3466	131.48	88.59	39.02	1.94	29.61	30.31	7.24	934.69	33.2	8.52	2.24	2.83	111.66	0.95	2.76	1.86	0.75	2.67	17.74	739.81	3.04	2.53	1.61	3.79	0.82	0.83	510.57	394.16	34.4	1332	31.2	59.98	12630	27.35	5.53	2.09	127.98
3467	68.97	28.01	64.19	1.94	40.87	63.92	13.49	559.57	49.97	14.16	2.24	2.83	78.77	0.95	2.76	1.86	1.64	2.67	4.69	5	3.04	2.53	4.32	4.72	0.82	0.96	540.49	223.1	12.07	774.85	3.06	22.6	12630	1.39	12.88	2.1	216.14
3468	19.89	44.67	51.67	9.83	42.3	81.78	15.25	234.29	107.84	11.31	39.4	2.83	105.44	0.95	2.76	1.86	1.29	11.28	6.22	6.98	3.04	17.05	1.61	4.4	0.82	5.99	3960	861.6	8.17	226.51	3.01	32.97	3502	1.39	10.14	2.09	86.83
3469	101	51.79	134	42.17	615	60.2	413	181	311	109	273	54.47	213	38.14	14.81	41.9	22.43	31.4	48.91	21.65	98.02	70.61	460	68.82	48.35	90.25	152	58.77	61.6	490	61.84	176	168	18.35	20.38	106	340
3470	43.08	73.49	28.22	90.14	2.62	23.65	100.88	47.83	12.42	185.3	34.75	1.61	1.88	1.25	1.67	1.94	0.66	39.14	0.76	32.24	2.26	29.48	1	9.62	33.51	1.26	257.25	219.96	13.94	880.64	74.8	1.51	437.39	7.26	12.18	2.16	817.23
3471
3472	2.94	10.33	3.33	2.5	2.62	5.6	31.69	55.36	9.71	1.41	57.12	1.61	1.88	1.25	1.67	1.94	0.66	6.75	0.76	2.69	2.26	1.02	1	1.87	10.81	1.26	36.27	168.22	20.39	869.4	2.66	1.51	176.77	0.39	0.74	1.61	4.26
3473	70.25	49.94	107.3	171.57	87.5	63.88	24.61	212.22	18.99	151.68	55.51	53.49	46.83	1.88	0.76	4.47	1.24	40.06	5.93	278.01	1.39	1.35	4.31	6.98	1.11	2.22	80.17	63.82	18.27	821.95	88.63	234.89	1328.24	6.39	13.11	1.1	324.81
3474
3475	155	79.23	32.18	6.16	121	118	54.42	1205	63.84	7.49	63.43	1.66	52.33	4.9	6.14	1.56	0.39	3.71	0.31	19.13	15.28	11.55	59.72	5.9	0.04	4.07	1963	198	23.81	3099	39.47	97.09	3620	6.2	32.45	2.27	122
3476	18.17	84.34	65.11	0.61	65.01	58.6	16.5	202.06	35.84	9.49	1.14	1.43	4.36	1.51	0.76	0.28	1.24	28.39	1.79	75.54	1.3	38.91	1.95	4.16	1.11	1.05	1207	197.6	10.56	1279.47	43.04	158	1397.21	2.17	21.42	1.1	116.23
3477	135	101	63.81	44.81	54.44	116	125	1707	19.91	320	63.43	0.07	5.35	24.94	0.36	0.39	0.81	56.1	0.14	37.23	45.96	13.92	71.78	25.05	0.04	2.69	1987	299	19	2402	107	151	68.98	15.32	30.54	0.28	607
3478
3479	34.85	201.26	24.63	1.94	11.63	17.28	3.89	503.69	10.07	4.81	2.24	2.83	16	0.95	2.76	1.86	1.03	2.67		4.08	3.04	2.53	1.61	2.59	0.82	0.83	231.39	314.29	2.57	427.06	3.01	19.54	4648	1.39	5.95	2.09	111.4
3480	225.19	12.06	20.43	0.67	25.6	19.94	37.04	2902.77	38.45	13.02	58.25	1.17	20.24	1.43	0.27	2.53	0.5	9.74	0.35	21.78	0.33	12.37	8.46	1.76	0.48	2.53	17626.2	181.15	6.3	1217.73	39.57	76.29	19800.4	2.46	2.67	0.53	103.92
3481
3482	37.23	0.81	63.81	0.47	235	29.13	128	85.65	86.12	19.41	56.44	9.71	50.95	11.39	4.8	2.91	3.88	5.59	10.61	0.73	26.87	11.77	69.2	21.89	7.39	14.92	45.54	29.2	37.11	168	13.45	94.57	61.75	3.85	5.62	25.57	106
3483	2.94	14.43	3.33	2.5	2.62	3.68	2.28	1.08	33.01	5.24	1.52	1.61	1.88	1.25	1.67	1.94	0.66	0.42	0.76	0.16	2.26	1.02	1	1.87	1.55	1.26	35.44	84.19	3.23	757.67	2.66	1.51	146.57	0.39	0.3	1.61	25.73
3484	25.26	87.6	81.76	36.18	2.62	5.35	10.11	36.3	11.96	238.75	39.74	1.61	1.88	4.05	1.67	1.94	0.66	6.85	72.43	48.19	4.14	1.92	1	19	374.14	1.26	218.9	174.85	3.23	1583.37	135.6	1.51	1327.37	4.18	6.04	1.61	969.36
3485	112.33	128.1	12.56	53.26	14.79	85.96	170.95	1005.07	68.14	0.61	293.27	0.28	5.41	0.82	0.27	5.23	0.54	22.17	0.35	17.81	0.33	0.09	0.56	1.34	45.64	0.68	659.15	401.76	38.15	857.64	5.09	17.59	17149.5	4.85	10.53	12.8	24.93
3486	189.73	44.67	47.53	1.94	84.1	45.04	13.49	999.5	40.07	4.37	2.24	2.83	31.2	0.95	2.76	1.86	0.75	2.67	12.69	809.79	3.04	2.53	1.61	2.59	0.82	0.83	225.79	425.85	97.65	1166	13.54	32.09	12630	7.85	3.01	2.09	94.02
3487	3.27	13.62	14.36	1.94	8.03	14.68	2.64	130.86	3.65	2.17	2.24	2.83	9.67	0.95	2.76	1.86	0.75	2.67	2.5	2.99	3.04	2.53	1.61	2.59	0.82	0.83	175.08	123.28	2.57	874.88	3.01	16.02	1242	1.39	8.53	2.09	2.47
3488
3489	482.63	31.23	68.51	0.67	88.61	63.13	162.77	2920.01	22.86	136.25	0.13	1.47	2.25	5	0.27	2.53	2.55	452.37	4.5	29.79	0.54	56.79	0.56	3875.91	27.88	9.6	292.59	246.11	16.68	1785.86	27.42	71.44	22036.5	4.09	5.93	0.53	206.26
3490
3491	2.94	4.42	65.45	2.5	2.62	8.98	81.03	127.91	7.53	5.66	1.52	1.61	1.88	1.29	1.67	1.94	0.66	0.42	0.76	10.41	2.26	1.02	1	1.87	1.55	4.59	114.4	100.68	3.23	1899.96	4.29	1.51	1002.07	5	1.68	2.47	9.95
3492	3.67	63.45	15.48	0.61	22.92	16.89	6.08	107.22	4.38	2.37	1.14	13.22	3.24	1.51	0.76	0.28	1.24	15.57	1.11	249.15	1.3	1.35	1.95	2.66	1.11	0.7	41.59	54.23	4.02	518.58	69	253.91	1086.09	1.65	29.39	1.1	32.8
3493	14.54	52.45	123.37	97.43	154.85	14.2	32.88	142.23	23.03	32.74	36.23	2.49	4.83	6.21	0.85	2.85	2.8	9.47	12.54	13.53	12.37	5.75	42.13	27.82	2.97	2.11	1008	279.47	24.99	814.53	12.27	59.4	729.73	2.41	31.26	5.1	293.97
3494
3495
3496
3497	258.36	172.89	10.53	0.67	45.6	12.55	11.86	640.28	0.08	21.25	0.13	0.9	2.25	0.4	0.27	2.53	0.5	1.74	0.35	36.43	0.33	0.09	0.56	0.9	0.48	0.14	451.68	431.74	7.35	1559.95	48.48	55.54	20304	3.02	4.65	0.53	145.28
3498	77.31	193.71	6.09	0.67	21.21	10.33	15.52	1177	3.2	214.24	0.13	0.28	2.25	1.55	0.98	2.53	0.68	61.23	0.35	59.19	0.33	0.09	0.56	1.58	0.48	0.14	283.27	587.35	3.72	3282.46	112.45	48.71	8626.34	26.94	53.94	0.53	737.32
3499	17.46	48.82	6.62	1.94	20.24	21.99	2.64	255.2	10.07	3.52	13.73	2.83	19.69	0.95	2.76	1.86	1.37	2.67	2.5	5.37	3.04	2.53	1.61	7.65	0.82	0.83	261.53	165.92	2.57	500.86	3.01	13.78	465.55	1.39	11.82	2.09	2.47
3500	235.77	128.54	15.46	19.6	44.49	15.67	22.71	1907.52	1.59	5.73	0.13	1.85	2.25	1.49	0.37	2.53	0.5	0.57	0.35	71.97	1.08	0.09	0.56	52.24	0.48	0.14	297.55	152.19	9.28	2579.56	83.31	113.25	18595.5	3.11	8.65	0.53	142.05
3501
3502	86.64	16.32	36.13	1.94	16.39	22.51	6.29	300.56	6.25	19.17	14.09	65.28	46.2	0.95	2.76	1.86	0.75	2.67	2.5	11.94	3.04	2.53	1.61	2.59	0.82	0.83	31.06	84.39	2.57	450.91	3.71	42.78	1963	1.39	4.57	2.09	187.92
3503
3504
3505	8.88	51.4	10.24	2.5	5.76	3.45	98.21	138.87	3.39	8.58	1.52	1.61	1.88	1.25	1.67	1.94	0.66	0.42	0.76	4.66	2.26	1.02	14.9	1.87	1.55	1.26	49.51	179.54	3.23	640.25	2.66	1.82	10748.9	0.39	1.58	1.61	15.96
3506	3.94	46.5	3.33	2.5	503.52	3.79	2.28	1.08	2.25	6.23	1.52	1.61	1.88	1.25	1.67	1.94	0.66	0.42	0.76	12.94	2.26	1.02	1	1.87	1.55	1.26	59.43	129.55	3.23	819.02	2.66	1.51	1547.8	0.62	1.28	1.61	59.23
3507	2.94	20	3.33	2.5	2.62	2.13	3.11	107.7	2.25	1.41	1.52	1.61	1.88	1.25	1.67	1.94	0.66	0.42	0.76	0.41	2.26	1.02	1	1.87	1.55	1.26	342.15	61.5	3.23	579.31	2.66	1.51	1047.27	0.39	1.45	1.61	0.98

## Sheet: FLU09 nasal
ID	EGF	Eotaxin	FGF-2	FLT3L	FKN	GCSF	GM-CSF	GRO	IFNα2	IFNγ	IL1α	IL1β	IL1Ra/Ra2	IL2	IL3	IL4	IL5	IL6	IL7	IL8	IL9	IL10	IL12-P40	IL12-P70	IL13	IL15	IP10	MCP1	MCP3	MDC	MIP1α	MIP1β	sCD40-L	TGFα	TNFα	TNFβ	VEGF
3200	28.81	2.94	4.18	3.08	31.04	7	2.29	87.67	2.97	1.4	7.38	2.6	7.95	2.44	0.9	1.22	1.15	2.75	2.98	40.57	2.86	3.98	2.31	2.8	1.03	1.02	5850	23.9	6.11	5.77	3.04	2.8	7.45	2.19	3.05	2.76	6.09
3201	136.82	20.17	89.54	22.26	136.25	6382.63	9.29	5404.31	27.63	12.71	195.76	132.3	276.76	5.55	8.66	5.8	5.1	166.02	13.07	4266.83	5.82	41.02	23.85	12.17	6.54	6.51	19029.5	252.76	26.06	122.89	201.06	403.23	116.97	13.71	94.61	1.36	266.7
3202	0.71	5.31	5.82	2.4	10.31	4.08	1.77	15.46	4.99	3.12	0.13	0.11	2.37	0.84	0.82	3.47	0.84	0.84	0.83	9.23	0.8	1.92	0.6	2.01	2.29	1.72	155.05	4.24	3.83	3.36	0.82	0.79	2.26	0.8	0.84	0.4	0.79
3203	24.95	5.4	8.47	4.45	0.85	4.82	1.18	0.52	4.13	0.78	3.08	0.8	0.79	2.04	3	0.81	1.04	0.83	0.05	15.62	1.06	3.31	0.52	2.82	3.14	1.78	56.06	5.57	5.99	5.96	0.84	2.98	0.62	0.78	1.12	0.89	5.96
3204	8.48	6.21	6.77	3.26	14.22	5.3	1.48	231.61	7	4.15	4.46	2.78	4.35	2.12	8.66	5.8	0.83	0.84	1.2	52.4	5.82	2.52	8.39	3.54	6.54	0.03	109.25	14.96	7.42	3.27	4.05	1.29	1.89	0.78	0.77	0.54	0.83
3205	94.95	10.46	12.35	3.2	93.94	290.65	2.48	1882.55	15.63	7.37	12.91	4.61	176.39	0.84	0.82	3.47	0.84	72.76	0.83	2782.63	0.8	84.44	1.66	2.01	2.29	1.72	16247.9	94.61	3.83	7.97	9.9	47.12	9.11	0.8	8.13	0.4	45.89
3206	19.75	2.25	4.19	2.45	7.36	14.89	1.54	150.7	4.23	1.24	14.13	1.42	6.05	1.38	4.2	2.32	0.42	0.87	0.42	46.3	2.28	6.29	3.6	2.1	2.1	1.43	3783.08	16.42	2.57	3.17	1.1	2.52	8.08	0.39	0.1	1.04	3.42
3207	53.39	5.4	8.47	4.45	78.86	29.1	1.18	175.97	4.13	1.01	34.03	0.8	31.77	2.04	3	0.84	1.04	5.84	2.64	120.26	1.06	3.31	0.52	2.82	3.14	1.78	2911.95	43.51	5.99	5.96	0.84	2.98	0.62	0.78	1.12	0.89	5.96
3208	54.29	2.94	7.39	3.49	58.55	8.95	2.29	119.55	3.19	0.69	1.68	2.6	27.08	2.44	0.9	1.22	1.15	2.75	4.28	24.21	2.86	1.75	2.31	2.8	1.55	1.02	309.4	6.96	8.85	11.1	3.04	2.8	8.8	2.19	3.05	2.76	6.09
3209	1.93	5.31	5.82	3.49	38	2.47	1.77	4.35	7.78	3.12	0.98	0.11	5.36	0.84	0.82	3.47	0.84	0.84	0.83	0.8	0.8	1.92	0.56	2.01	2.29	1.72	85.3	4.24	3.83	7.97	0.82	0.79	2.26	0.8	0.84	0.4	0.79
3210	107.07	2.94	4.18	3.08	19.17	46.89	2.29	451.73	0.9	0.66	0.93	2.6	5	2.44	0.9	1.22	1.15	2.75	2.98	130.38	2.86	1.26	2.31	2.8	0.53	1.02	336.41	22.62	2.89	2.97	3.04	2.8	5.16	2.19	3.05	2.76	6.09
3211	4.46	5.31	5.82	2.4	1.84	3.05	1.77	2.17	9.13	3.12	0.37	0.11	5.07	0.84	0.82	3.47	0.84	0.84	0.83	0.8	0.8	2.56	0.6	2.01	2.29	1.72	228.59	3.41	3.83	3.36	0.82	0.79	4.4	0.8	0.84	0.4	0.79
3212	94.75	5.4	8.47	4.45	38.51	46.13	1.18	712.92	4.13	0.78	9.39	0.8	12.17	2.04	3	0.81	1.04	0.83	3.69	268.79	1.06	7.38	0.52	2.82	3.14	1.78	9236.78	84.09	5.99	5.96	0.84	2.98	0.62	0.78	1.12	0.89	5.96
3213	17.59	2.94	4.18	3.08	3.78	36.26	2.29	224.64	0.89	0.66	0.93	2.6	2.08	2.44	0.9	1.22	1.15	2.75	2.98	26.53	2.86	1.26	2.31	2.8	0.53	1.02	541.04	3.11	2.89	2.88	3.04	2.8	3.76	2.19	3.05	2.76	6.09
3214	46.56	5.31	5.82	2.4	0.77	2.47	1.77	82.77	12.07	3.12	16.57	0.11	22.28	0.84	0.82	3.47	0.84	0.84	0.83	17.05	0.8	1.92	0.63	2.01	2.29	1.72	344	20.49	3.83	4.53	0.82	0.79	2.26	0.8	0.84	0.4	0.79
3215	213.96	60.05	124.8	21.15	326.64	18202.6	34.59	6209.2	235.61	38.04	212.86	768.97	1563.47	6	0.82	25.5	0.84	2601.57	19.75	4745.48	0.8	133.89	16.24	7.91	2.29	3.88	18640.3	3270.7	35.78	88.05	5266.95	4590.4	58.3	43.45	873.7	1.09	1693.11
3216	11.54	6.21	6.77	5.77	17.1	1.64	1.48	359.94	4.02	4.15	24.51	2.78	53.36	2.12	8.66	5.8	0.83	0.84	1.75	39.62	5.82	2.52	8.39	3.54	6.54	0.03	563.56	11.93	7.42	3.5	4.05	1.29	1.89	0.78	0.77	0.54	0.83
3217	31.64	6.21	6.77	3.17	14.22	66.26	1.48	719.89	7.63	4.15	8.84	2.78	22.22	2.12	8.66	5.8	0.83	0.84	1.2	255.12	5.82	2.52	8.39	3.54	6.54	0.03	855.69	18.4	7.42	3.27	4.05	1.81	1.89	0.78	0.77	0.54	0.83
3218	220.61	16.55	65.97	15.34	802.59	15336.3	8.4	4834.99	8.36	334.2	106.36	3696.3	615.91	4.13	0.82	14.15	15.34	198.58	3.57	5078.29	0.8	468.41	9.64	9.74	2.29	4.27	18494.3	205.08	32.47	70.2	83.2	134.46	33.56	26.72	116.21	0.59	708.22
3219	42.71	5.2	8.19	5.82	29.32	48.16	5.22	669.31	6.69	3.3	2.52	5.82	11.65	6.2	2.86	5.02	4.44	5.85	5.62	146.54	5.69	2.16	2.46	5.14	3.37	1.59	14150	18.18	5.87	4.97	6.31	4.55	5.33	3.82	6.11	5.53	12.63
3220	119.12	5.4	8.47	4.45	93.93	13.27	1.18	506.79	4.13	0.84	20.81	0.8	68.44	2.04	3	0.99	1.04	0.83	8.01	741.27	1.06	3.31	0.52	2.82	3.14	1.78	267.53	165.34	5.99	5.96	0.84	2.98	1.31	2.56	1.12	0.89	24.04
3221	51.87	5.2	8.19	5.82	30.19	3.77	5.22	108.06	3.72	3.3	3.91	5.82	12.73	6.2	2.86	5.02	4.44	5.85	5.62	56.8	5.69	2.16	2.46	5.14	3.37	1.59	48.14	17.22	5.87	4.94	6.31	4.55	5.33	3.82	6.11	5.53	6.29
3222	5.86	5.2	8.19	5.82	5.36	3.96	5.22	6	3.72	3.3	1.16	5.82	6.04	6.2	2.86	5.02	4.44	5.85	5.62	10.37	5.69	2.16	2.46	5.14	3.37	1.59	4.51	6.27	5.87	4.94	6.31	4.55	5.33	3.82	6.11	5.53	6.29
3223	133.42	42.34	61.75	14.3	60.79	2228	15.42	2603	20.77	5.89	47.37	149.74	204.63	3.22	0.9	2.08	1.15	1273	11.8	6046	2.86	96.78	10.9	14.55	1.63	2.53	10706	970.45	31.73	23.34	2032	846.53	57.86	16.4	248.39	2.76	235.29
3224	89.71	6.21	6.77	5.46	35.53	13.32	1.48	523.01	13.86	4.15	40.58	2.78	79.31	2.12	8.66	5.8	0.83	1.15	2.38	136.39	5.82	3	8.39	3.54	6.54	0.03	5238.92	48.7	8.31	11.24	4.05	4.48	14.08	0.78	0.77	0.54	23.84
3225	158.81	2.25	4.19	3.33	19.89	20.59	1.7	446.53	5.86	1.24	19.71	1.42	37.2	1.38	4.2	2.32	0.42	7.85	4.55	304.35	2.28	11.89	3.6	2.1	2.1	1.43	2610.84	52.67	3.33	25.36	20.49	16.15	9.16	1.2	2.97	1.04	56.39
3226	82.57	5.2	8.19	5.82	5.36	3.77	5.22	176.91	3.72	3.3	1.16	5.82	6.04	6.2	2.86	5.02	4.44	5.85	5.62	337.27	5.69	2.16	2.46	5.14	3.37	1.59	114.52	24.56	5.87	4.94	6.31	4.55	5.33	3.82	6.11	5.53	6.29
3227	122.04	5.4	8.47	4.45	298.78	391.45	1.18	1157.47	4.13	2.8	14.67	7.58	22.32	2.04	3	0.81	1.04	97.82	11.49	458.27	1.06	3.31	0.52	2.82	3.14	1.78	11084.8	87.64	5.99	5.96	0.84	2.98	5.33	1.34	62.4	0.89	7.95
3228	5.86	5.2	8.19	5.82	5.36	3.77	5.22	6	3.72	3.3	1.16	5.82	6.04	6.2	2.86	5.02	4.44	5.85	5.62	5.91	5.69	2.16	2.46	5.14	3.37	1.59	4.51	6.27	5.87	4.94	6.31	4.55	5.33	3.82	6.11	5.53	6.29
3229	63.63	22.77	47.41	15.46	132.13	4470.16	7.94	5331.87	22.69	29.09	148.13	154.33	1056.25	5.51	4.2	10.87	0.42	2315.15	10.53	4019.84	2.28	215.61	35.22	6.62	2.1	5.88	19508.8	535.2	17.66	63.06	175.02	600.73	72.93	15.3	109.91	4.14	113
3230	218.58	17.57	27.95	8.61	91.6	1040	5.22	3225	27.14	5.48	24.92	24.47	86.13	6.2	2.86	5.02	4.44	205.17	5.62	1391	5.69	11.63	10.86	5.14	3.37	2.48	16884	158.38	19.02	12.08	195.71	363.54	21.43	4.31	146.49	5.53	207.99
3231	238.56	25.88	10.04	6.48	92.31	353.25	2.29	1457	16.13	6.12	15.6	2.6	38.36	2.44	0.9	8.89	1.15	31.78	8.62	736.18	2.86	44.92	2.31	2.8	1.55	3.29	9385	83.01	11.03	21.29	14.99	12.04	17.58	2.43	4.84	2.76	60.35
3232	63.72	5.31	6.65	2.4	0.77	92.26	1.77	542.71	8.36	29.12	3.15	0.15	9.92	0.84	0.82	3.47	0.84	25.6	0.83	115.66	0.8	79.28	0.56	2.01	2.29	1.72	8579.78	80.53	3.83	4.8	0.82	0.79	3.49	0.8	0.84	0.4	0.81
3233	52.33	18.35	60.48	11.02	152.01	3171	5.55	3332	113.12	6.37	12.26	5.82	64.36	6.2	2.86	5.02	4.44	54.53	5.62	768.68	5.69	8.38	10.61	11.71	3.37	2.52	18868	314.56	38.08	15.5	48.44	84.56	26.92	3.85	16.41	5.53	162.27
3234	20.35	6.21	6.77	3.17	8.79	1.64	1.48	128.68	4.87	4.15	5.96	2.78	15.16	2.12	8.66	5.8	0.83	0.84	1.2	22.64	5.82	2.52	8.39	3.54	6.54	0.03	354.09	4.58	7.42	4.97	4.05	1.29	1.89	0.78	0.77	0.54	0.83
3235	7.8	4.48	5.31	3.13	3.03	2.82	1.15	0.68	0.21	2.07	0.57	0.6	2.28	0.75	4.43	6.53	0.82	0.84	0.82	0.85	4.38	0.26	2.68	1.4	2.11	0.59	0.67	0.09	6.25	3.17	2.1	3.09	2.6	0.8	0.84	1.49	3.39
3236	17.53	4.48	18.8	13.36	159	138	1.88	502	18.65	6.59	2.28	3.18	48.04	0.86	4.43	6.53	0.82	39.41	11.27	161	4.38	50.68	4.67	4.68	3.52	2.37	3978	48.63	17.16	42.36	2.1	17.38	21.31	0.8	0.84	3.54
3237	5.86	5.2	8.19	5.82	5.94	6.73	5.22	56.81	3.72	3.3	1.16	5.82	6.04	6.2	2.86	5.02	4.44	5.85	5.62	30.29	5.69	2.16	2.46	5.14	3.37	1.59	122.11	18.43	5.87	4.94	7.05	16.32	5.33	3.82	16.63	5.53	6.29
3238	17.21	5.2	8.19	5.82	12.98	3.77	5.22	6	3.72	3.3	1.64	5.82	7.32	6.2	2.86	5.02	4.44	5.85	5.62	5.91	5.69	2.16	2.46	5.14	3.37	1.59	4.51	6.27	5.87	5.57	6.31	4.55	5.33	3.82	6.11	5.53	6.29
3239	47.77	6.19	40.14	6.98	317.88	138.23	5.22	923.51	106.14	4.12	14.91	7.94	128.18	6.2	2.86	5.02	4.44	87.09	5.62	723.09	5.69	5.45	6.04	11.8	3.99	2.11	20709	422.75	20.62	12.66	55.36	65.16	20.1	3.87	36.14	5.53	230.24
3240	68.64	6.21	6.77	3.17	11.43	170.52	1.48	1569.77	4.02	4.15	34.14	2.78	7.45	2.12	8.66	5.8	0.83	11.48	1.2	188.17	5.82	57.75	8.39	3.54	6.54	0.03	12251.3	63.03	7.42	13.19	4.05	15.43	22.48	0.78	0.77	0.54	0.83
3241	15.74	5.4	8.47	4.45	45.74	4.82	1.18	0.52	4.13	0.78	2.71	0.8	1.15	2.04	3	0.81	1.04	0.83	0.4	38.53	1.06	3.31	0.52	2.82	3.14	1.78	20.57	8.59	5.99	5.96	0.84	2.98	1.31	0.78	1.12	0.89	5.96
3242	42.74	4.48	8.28	3.56	49.81	862	3.21	1181	23.2	3.59	4.73	13.23	74.09	0.75	4.43	6.53	0.82	120	0.82	298	4.38	4.88	2.68	1.4	2.11	0.59	8325	62.12	6.25	6.4	106	203	94.63	0.8	53.7	1.49	74.61
3243	48.92	5.31	5.82	2.4	0.77	2.47	1.77	1.06	2.85	3.12	0.13	0.11	3.64	0.84	0.82	3.47	0.84	0.84	0.83	7.1	0.8	1.92	0.56	2.01	2.29	1.72	3.62	6.89	3.83	3.36	0.82	0.79	2.26	0.8	0.84	0.4	0.79
3244	47.1	5.2	8.19	5.82	24.09	88.75	5.22	643.15	3.72	3.3	4.2	5.82	6.71	6.2	2.86	5.02	4.44	5.85	5.62	142.04	5.69	2.16	2.46	5.14	3.37	1.59	682.02	30.17	6.44	6.76	6.31	4.55	5.33	3.82	6.11	5.53	6.29
3245	30.56	49.73	114.27	50.75	728.51	340.48	17.94	3200.83	110.44	36.47	219.88	60.24	1306.67	42.76	21.61	138.82	0.97	16.16	22.22	4895.52	15.3	53.71	48.18	48.8	9.42	59.91	320.36	84.68	56.25	75.15	30.09	332.39	359.92	7.09	15.77	18.04	16.32
3246	25.39	4.48	8.51	3.13	25.65	22.83	1.15	217	40.18	5.1	6.26	0.6	7.46	0.75	4.43	6.53	0.82	16.13	0.82	111	4.38	19.91	2.68	1.4	2.11	0.59	1956	29.72	6.25	3.58	6.05	28.31	2.6	0.8	1.21	1.49	9.49
3247	4.17	2.94	4.18	3.08	3.78	2.04	2.29	84.78	0.89	0.66	0.93	2.6	1.9	2.44	0.9	1.22	1.15	2.75	2.98	55.7	2.86	1.26	2.31	2.8	0.53	1.02	4.8	3.11	2.89	2.88	3.04	2.8	1.58	2.19	3.05	2.76	6.09
3248	62.94	6.21	6.77	3.17	11.43	437.43	1.48	1588.79	6.07	4.15	23.58	2.78	4.35	2.12	8.66	5.8	0.83	0.84	1.2	129.68	5.82	4.2	8.39	3.54	6.54	0.03	7523.94	67.86	7.42	3.27	4.05	1.29	16.14	0.78	0.77	0.54	0.83
3249	111.62	8.41	18.71	3.08	30.03	1267	3.2	1380	4.33	16.69	15.29	44.04	28.32	2.44	0.9	1.22	1.15	35.33	4.75	521.03	2.86	29.73	3.85	3.25	0.53	1.02	10839	85.66	9.08	20.87	32.46	16.68	11.62	2.73	23.17	2.76	45.18
3250	101.37	13.3	23.21	6.65	51.69	7182.49	4.35	3798.86	34.24	12.11	15.87	14.93	80.57	1.07	0.82	12.18	0.84	85.26	3.95	537.67	0.8	18.95	4.64	3.48	2.29	2.37	16733.6	91.07	12.44	10.14	48.26	107.05	9.59	4.59	72.89	0.4	111.14
3251	73.82	11.75	45.9	7.96	53.94	350.1	4.31	1171	11.92	3.46	18.95	10.1	46.03	2.44	0.9	1.9	1.15	164.17	7.12	618.14	2.86	26.4	6.67	9.43	3.54	1.91	3639	121.99	14.59	11.1	115.34	130.77	46.88	3.71	119.29	2.76	92.87
3252	26.56	4.48	5.31	3.13	4.18	2.76	1.15	3.42	0.21	2.07	26.83	0.6	12.86	0.75	4.43	6.53	0.82	0.84	0.82	11.65	4.38	0.46	2.68	1.4	2.11	0.59	0.67	19.36	6.25	6.4	2.1	3.09	2.6	0.8	0.84	1.49	5
3253	37.04	2.25	6.6	4.78	19.89	833.16	1.97	1127.32	10.02	1.39	17.13	5.76	10.21	1.38	4.2	2.32	0.42	6.37	1.2	123.59	2.28	2.8	3.6	2.1	2.1	1.43	9930.34	21.62	5.08	14.58	8.06	7.44	12.04	1.51	1.2	1.04	12.55
3254	30.23	6.21	6.77	3.17	8.79	1.64	1.48	522.56	4.02	4.15	2.77	2.78	4.35	2.12	8.66	5.8	0.83	0.84	1.2	41.2	5.82	2.52	8.39	3.54	6.54	0.03	373.98	4.96	7.42	3.5	4.05	1.29	1.89	0.78	0.77	0.54	0.83
3255	117.71	27.16	39.05	3.91	160.35	907.04	6.36	2231	9.64	3.38	45.57	41.83	144.62	2.44	1.58	1.22	1.15	35.48	8.46	5171	2.86	7.44	10.57	7.6	3.5	4.36	10708	361.48	12.79	34.29	309.37	200.66	16.36	12.43	88.22	2.76	213.19
3256	0.71	5.31	5.82	2.4	1.84	2.47	1.77	0.78	2.85	3.12	0.13	0.11	1.49	0.84	0.82	3.47	0.84	0.84	0.83	0.8	0.8	1.92	0.88	2.01	2.29	1.72	3.62	0.84	3.83	4.24	0.82	0.79	2.26	0.8	0.84	0.4	0.79
3257	43.63	5.31	5.82	2.4	4.04	2.47	1.77	141.03	4.9	3.12	9.21	0.11	15.47	0.84	0.82	3.47	0.84	0.84	0.83	46.22	0.8	1.92	0.56	2.01	2.29	1.72	355.16	29.19	3.83	4.24	0.82	0.79	2.26	0.8	0.84	0.4	0.79
3258	8.48	6.21	6.77	3.17	8.79	1.64	1.48	122.44	5.16	4.15	6.02	2.78	4.35	2.12	8.66	5.8	0.83	0.84	1.2	70.81	5.82	2.52	8.39	3.54	6.54	0.03	696.5	12.45	7.42	3.27	4.05	1.29	1.89	0.78	0.77	0.54	0.83
3259	5.86	5.2	8.19	5.82	5.36	3.77	5.22	6	3.72	3.3	1.16	5.82	6.04	6.2	2.86	5.02	4.44	5.85	5.62	5.91	5.69	2.16	2.46	5.14	3.37	1.59	4.51	6.27	5.87	4.94	6.31	4.55	5.33	3.82	6.11	5.53	6.29
3260
3261	20.13	5.2	8.19	5.82	44.09	36.01	5.22	668.49	3.81	10	8.29	5.82	11.3	6.2	2.86	5.02	4.44	40.89	5.62	175.25	5.69	20.49	2.46	5.14	3.37	1.59	16299	153.14	6.44	6.16	12.96	19.44	5.33	3.82	6.11	5.53	6.29
3262	7.53	2.94	4.18	3.08	3.78	2.04	2.29	3.36	0.89	0.66	0.93	2.6	4.1	2.44	0.9	1.22	1.15	2.75	2.98	2.75	2.86	1.26	2.31	2.8	0.53	1.02	2.14	8.17	2.89	2.88	3.04	2.8	1.58	2.19	3.05	2.76	6.09
3263	112.67	67.07	89.89	4.98	634.51	4528.2	19.96	2808.71	465.11	39.01	145.88	387.41	424.94	3.23	73.06	13.07	1.04	1187.57	46.08	4346.37	4.77	41.8	53.17	29.97	58.21	8	14937.9	2767.6	42.29	43.04	842.15	749.6	42.73	17.33	608.01	1.15	683.3
3264	0.71	5.31	5.82	2.4	4.04	2.85	1.77	2.61	2.85	3.12	0.23	0.11	2.37	0.84	0.82	3.47	0.84	0.84	0.83	4.05	0.8	1.92	1	2.01	2.29	1.72	3.62	0.84	3.83	3.36	0.82	0.79	2.26	0.8	0.84	0.4	0.79
3265	7.24	5.2	8.19	5.82	7.41	3.77	5.22	6	3.72	3.3	1.16	5.82	6.04	6.2	2.86	5.02	4.44	5.85	5.62	5.91	5.69	2.16	2.46	5.14	3.37	1.59	4.51	6.27	5.87	4.94	6.31	4.55	5.33	3.82	6.11	5.53	6.29
3266	23.79	6.21	6.77	3.17	17.1	1.64	1.48	9.92	8.59	4.15	3.46	2.78	9.13	2.12	8.66	5.8	0.83	0.84	1.2	30.85	5.82	2.52	8.39	3.54	6.54	0.03	125.23	26.32	7.42	3.27	4.05	1.29	1.89	0.78	0.77	0.54	0.83
3267	20.26	5.2	31.63	5.82	99.3	305.99	5.22	1424	8.36	3.3	13.93	6.26	83.56	6.2	20.38	5.02	4.44	35.69	5.62	1813	5.69	2.16	10.36	5.14	3.37	1.59	7755	257.03	17.06	8.55	97.79	23.73	15.28	3.82	7.8	5.53	28.47
3268	547.93	129.28	125.88	4.45	149.54	5019.33	4.7	2518.99	17.37	6.03	72.27	315.68	388.32	2.04	26.55	0.81	1.04	119.32	13.92	4321.36	1.06	4.68	6.4	7.89	3.14	2.46	13277.3	246.58	19.84	43.78	455.42	643.22	36.52	25.96	57.69	0.89	739.62
3269	31.53	5.4	8.47	4.45	113.7	77.93	1.24	2135.21	4.13	0.78	7.78	0.8	31.17	2.04	3	0.81	1.04	1.02	20.65	3737.35	1.06	3.31	0.52	2.82	3.14	1.78	169.45	74.4	5.99	5.96	0.84	2.98	0.62	3.34	1.12	0.89	36.21
3270	0.71	5.31	5.82	2.4	0.77	2.47	1.77	0.84	2.85	3.12	0.13	0.11	1.33	0.84	0.82	3.47	0.84	0.84	0.83	0.8	0.8	1.92	1.52	2.01	2.29	1.72	3.62	0.84	3.83	3.36	0.82	0.79	2.26	0.8	0.84	0.4	0.79
3271	70.78	2.94	4.18	3.08	14.36	3.03	2.29	291.01	1.39	0.66	1.58	2.6	13.39	2.44	0.9	1.22	1.15	2.75	2.98	102.59	2.86	1.26	2.31	2.8	0.88	1.02	412.93	39.5	2.89	3.17	3.04	2.8	4.68	2.19	3.05	2.76	8.42
3272	8.51	5.31	5.82	2.4	0.77	2.47	1.77	10.78	3.17	3.12	0.13	0.11	4.92	0.84	0.82	3.47	0.84	0.84	0.83	37.45	0.8	1.92	0.56	2.01	2.29	1.72	3.62	10.57	3.83	3.36	0.82	0.79	2.26	0.8	0.84	0.4	0.79
3273	5.86	5.2	8.19	5.82	5.36	3.77	5.22	6	3.72	3.3	1.16	5.82	6.04	6.2	2.86	5.02	4.44	5.85	5.62	5.91	5.69	2.16	2.46	5.14	3.37	1.59	4.51	6.27	5.87	4.94	6.31	4.55	5.33	3.82	6.11	5.53	6.29
3274	3.34	2.94	10.88	3.08	63.34	73.46	2.29	227.66	16.26	4.27	4	2.6	23.41	2.44	0.9	1.22	1.15	11.05	2.98	60.64	2.86	51.17	2.31	2.8	2.82	1.02	1934	38.86	5.57	2.88	3.04	2.8	8.26	2.19	3.05	2.76	33.89
3275	6.08	5.4	8.47	4.45	0.85	4.82	1.18	0.52	4.13	0.78	0.33	0.8	0.79	2.04	3	0.81	1.04	0.83	0.05	0.84	1.06	3.31	0.52	2.82	3.14	1.78	2.3	4.45	5.99	5.96	0.84	2.98	0.62	0.78	1.12	0.89	5.96
3276	21.4	6.21	6.77	3.17	17.1	2.14	1.48	10.96	14.53	4.15	27.56	2.78	11.48	2.12	8.66	5.8	0.83	0.84	1.2	11.94	5.82	2.52	8.39	3.54	6.54	0.03	15.77	32.98	7.42	3.27	4.05	1.29	1.89	0.78	0.77	0.54	0.83
3277	3.04	2.94	4.18	3.08	3.78	2.04	2.29	3.36	0.89	0.66	1.19	2.6	1.9	2.44	0.9	1.22	1.15	2.75	2.98	2.75	2.86	1.26	2.31	2.8	0.53	1.02	2.14	3.11	2.89	2.88	3.04	2.8	1.58	2.19	3.05	2.76	6.09
3278	52.95	2.94	4.18	3.08	10.56	18.41	2.29	154.94	1.48	0.66	2.34	2.6	5.47	2.44	0.9	1.22	1.15	2.75	2.98	35.25	2.86	1.67	2.31	2.8	0.53	1.02	728.2	38.68	2.89	3.17	3.04	2.8	2.3	2.19	3.05	2.76	6.09
3279	8.66	4.48	5.31	3.13	3.03	2.76	1.15	0.68	0.21	2.07	0.57	0.6	2.28	0.75	4.43	6.53	0.82	0.84	0.82	0.85	4.38	0.26	2.68	1.4	2.11	0.59	0.67	0.09	6.25	3.17	2.1	3.09	2.6	0.8	0.84	1.49	3.39
3280	5.86	5.2	8.19	5.82	5.36	3.77	5.22	6	3.72	3.3	1.16	5.82	6.04	6.2	2.86	5.02	4.44	5.85	5.62	5.91	5.69	2.16	2.46	5.14	3.37	1.59	4.51	6.27	5.87	4.94	6.31	4.55	5.33	3.82	6.11	5.53	6.29
3281	8.33	5.2	8.19	5.82	154.06	36.65	5.22	588.52	44.36	3.3	1.6	5.82	14.58	6.2	2.86	5.02	4.44	5.85	5.62	103.32	5.69	102.05	2.46	6.03	3.37	1.59	11186	51.46	5.87	4.94	6.31	5.93	25.52	3.82	6.11	5.53	30.06
3282	3.04	2.94	4.18	3.08	3.78	2.04	2.29	3.36	0.89	0.66	0.93	2.6	2.84	2.44	0.9	1.22	1.15	2.75	2.98	2.75	2.86	1.26	2.31	2.8	0.53	1.02	2.14	3.11	2.89	2.88	3.04	2.8	1.58	2.19	3.05	2.76	6.09
3283	3.04	2.94	4.18	3.08	5.26	2.04	2.29	13.37	0.89	0.66	0.93	2.6	4.1	2.44	0.9	1.22	1.15	2.75	2.98	11.72	2.86	1.26	2.31	2.8	0.53	1.02	9.22	3.11	2.89	2.88	3.04	2.8	1.58	2.19	3.05	2.76	6.09
3284	66.04	5.4	8.47	4.45	0.85	6.24	1.18	288.45	4.13	0.84	19.51	0.8	15.47	2.04	3	0.81	1.04	0.83	0.05	61.84	1.06	3.31	0.52	2.82	3.14	1.78	367.14	39.24	5.99	5.96	0.84	2.98	0.62	0.78	1.12	0.89	5.96
3285	2.22	2.25	4.19	2.45	3.25	1.13	1.54	30.39	2.16	1.24	1.86	1.42	3.25	1.38	4.2	2.32	0.42	0.41	0.42	10.34	2.28	1.24	3.6	2.1	2.1	1.43	74.35	3.76	2.42	3.17	1.1	1.79	1.69	0.39	0.1	1.04	3.42
3286	5.86	5.2	8.19	5.82	5.36	3.77	5.22	6	3.72	3.3	1.16	5.82	6.04	6.2	2.86	5.02	4.44	5.85	5.62	5.91	5.69	2.16	2.46	5.14	3.37	1.59	4.51	6.27	5.87	4.94	6.31	4.55	5.33	3.82	6.11	5.53	6.29
3287	7.4	4.48	5.31	3.13	3.03	2.76	1.15	0.68	0.21	2.07	0.57	0.6	2.28	0.75	4.43	6.53	0.82	0.84	0.82	0.85	4.38	0.31	2.68	1.4	2.11	0.59	0.67	0.09	6.25	3.02	2.1	3.09	2.6	0.8	0.84	1.49	3.39
3288	523.67	60.61	43.91	4.32	98.31	5321	7.63	2518	26.09	8.18	19.84	120.23	117.28	2.44	0.9	1.72	1.15	53.11	13.97	4855	2.86	35.87	6.99	8.88	2.03	3.13	10550	162.53	16.73	97.79	191.35	147.58	46.24	12.51	22.09	2.76	712.74
3289	12.02	2.94	4.18	3.08	3.78	3.03	2.29	3.36	0.89	0.66	0.93	2.6	4.1	2.44	0.9	1.22	1.15	2.75	2.98	3.54	2.86	12.73	2.31	2.8	0.53	1.02	17.15	3.11	2.89	2.88	3.04	2.8	1.58	2.19	3.05	2.76	6.09
3290	5.86	5.2	8.19	5.82	5.36	3.77	5.22	6	3.72	3.3	2.13	5.82	6.04	6.2	2.86	5.02	4.44	5.85	5.62	5.91	5.69	2.16	2.46	5.14	3.37	1.59	4.51	6.27	5.87	4.94	6.31	4.55	5.33	3.82	6.11	5.53	6.29
3291	8.48	6.21	6.77	3.17	8.79	4.14	1.48	10.61	4.02	4.15	1.8	2.78	4.35	2.12	9.42	5.8	0.83	0.84	1.2	7.83	5.82	2.52	8.39	3.54	6.54	0.03	11.02	2.92	7.42	3.27	4.05	1.29	1.89	0.78	0.77	0.54	0.83
3292	7.47	5.2	8.19	5.82	5.36	3.77	5.22	6	3.72	3.3	1.16	5.82	6.04	6.2	2.86	5.02	4.44	5.85	5.62	5.91	5.69	2.16	2.46	5.14	3.37	1.59	4.51	6.27	5.87	4.94	6.31	4.55	5.33	3.82	6.11	5.53	6.29
3293	5.86	5.2	8.19	5.82	6.67	3.77	5.22	6	3.72	3.3	1.16	5.82	6.04	6.2	2.86	5.02	4.44	5.85	5.62	5.91	5.69	2.16	2.46	5.14	3.37	1.59	4.51	6.27	5.87	4.94	6.31	4.55	5.33	3.82	6.11	5.53	6.29
3294	44.5	5.31	5.82	2.91	38	110.14	1.77	574.24	15.43	3.12	1.86	0.11	3.92	0.84	0.82	3.47	0.84	0.84	0.83	62.16	0.8	3.83	0.56	2.01	2.29	1.72	2381.95	30.85	3.83	7.47	0.82	0.79	4.8	0.8	0.84	0.4	0.79
3295	13.19	5.31	5.82	2.4	24.96	2.47	1.77	0.78	15.43	3.12	2.72	0.11	2.61	0.84	0.82	3.47	0.84	0.84	0.83	0.8	0.8	1.92	1.04	2.01	2.29	1.72	6.74	2.74	3.83	3.36	0.82	0.79	2.26	0.8	0.84	0.4	0.79
3296	12.66	4.48	5.31	3.13	3.03	2.76	1.15	1.77	0.21	2.07	0.57	0.6	2.28	0.75	4.43	6.53	0.82	0.84	0.82	0.85	4.38	0.27	2.68	1.4	2.11	0.59	18.12	0.78	6.25	4.8	2.1	3.09	2.6	0.8	0.84	1.49	3.39
3297	0.71	16.39	24.74	10.98	866.8	486.26	7.57	2437.32	110.19	51.33	21.35	28.6	91.73	0.84	0.82	6.17	0.84	255.72	5.73	2466.61	0.8	196.79	3.34	2.67	3.99	2.26	20294.2	383.52	8.4	11.73	129.56	422.64	9.59	0.8	105.13	0.4	128.44
3298	104.04	6.21	6.77	3.17	11.43	1.64	1.48	47.68	5.46	4.15	5.41	2.78	4.35	2.12	10.74	5.8	0.83	0.84	1.2	49.16	5.82	2.52	8.39	3.54	6.54	0.03	23.33	11.58	7.42	3.27	4.05	1.29	1.89	0.78	0.77	0.54	0.83
3299	56.63	5.31	5.82	2.4	9.01	28.13	1.77	523.12	5.62	3.12	1.46	0.11	35.86	0.84	0.82	3.47	0.84	0.84	0.83	107.12	0.8	1.92	0.56	2.01	2.29	1.72	584.24	14.51	3.83	6.95	0.82	0.79	2.32	0.8	0.84	0.4	1.86
3300	134.66	29.11	47.41	6.47	508.25	143.62	4.81	1332.12	35.33	25.98	39.66	2.86	192.33	3.38	4.2	2.32	12.98	59.26	8.86	897.66	2.28	32.6	16.04	2.43	2.1	4.74	14150	173.48	12.66	43.85	12.45	49.79	37.46	5.49	7.46	1.04	60.91
3301	7.8	4.48	10.33	3.13	56.74	76.18	1.15	225	31.55	2.07	0.57	0.6	2.28	0.75	4.43	6.53	0.82	5.35	0.82	39.17	4.38	0.81	2.68	2.18	2.11	0.59	4999	10.33	7.18	4.8	2.1	3.94	2.87	0.8	0.84	1.49	3.99
3302	34.42	5.31	5.82	2.4	4.04	12.34	1.77	161.04	9.52	3.12	4.04	0.11	9.57	0.84	0.82	3.47	0.84	0.84	0.83	66.89	0.8	1.92	0.56	2.01	2.29	1.72	87.77	38.2	3.83	3.36	0.82	0.79	2.26	0.8	0.84	0.4	0.79
3303	87.5	6.21	6.77	3.17	8.79	8.81	1.48	256.03	6.69	4.15	10.52	2.78	4.35	2.12	8.66	5.8	0.83	0.84	1.2	88.3	5.82	2.52	8.39	3.54	6.54	0.03	1471.77	50.21	7.42	3.27	4.05	1.29	1.89	0.78	0.77	0.54	0.83
3304	289.27	156.81	61.72	4.45	129.6	2563.93	4.53	2497.36	18.33	8.49	14.49	25.37	99.58	2.04	17.62	0.81	1.04	151.36	16.15	2799.05	1.06	64.43	1.89	5.5	6.06	2.06	13518.5	276.86	18.71	59.08	179.05	137.42	35.75	10.04	84.53	0.89	443.94
3305	23.68	5.4	8.47	4.45	0.85	4.82	1.18	0.52	4.13	0.78	0.64	0.8	0.79	2.04	3	0.81	1.04	0.83	0.05	45.55	1.06	3.31	0.52	2.82	3.14	1.78	124.89	4.45	5.99	5.96	0.84	2.98	0.62	0.78	1.12	0.89	5.96
3306	66.11	62.03	68.26	14.26	92.92	14615.9	19.57	3550.16	181.08	34.87	93.91	535.76	650.91	2.3	0.82	3.47	0.84	2490.97	13.89	4223	0.8	40.75	8.23	6.9	2.29	2.59	18238.1	2494.67	23.97	23.15	2129.96	1555.19	22.4	11.73	583.73	0.4	320.81
3307	21.2	2.94	4.18	3.08	5.26	5.59	2.29	76.31	1.14	0.66	14.4	2.6	17.43	2.44	0.9	1.22	1.15	2.75	2.98	41.41	2.86	1.26	2.31	2.8	0.53	1.02	59.16	13.8	2.89	2.88	3.04	2.8	2.69	2.19	3.05	2.76	6.09
3308	61.01	2.94	9.18	3.08	26.93	55.53	2.29	322.23	1.39	1.44	22.21	2.6	20.39	2.44	0.9	1.49	1.15	2.75	2.98	92.53	2.86	1.71	2.31	2.8	0.75	1.02	2214	21.66	3.49	3.17	3.04	2.8	8.8	2.19	3.05	2.76	8.42
3309	22.01	6.21	6.77	6.71	33.95	1.64	1.48	202.41	10.21	4.15	2.72	2.78	18.65	2.12	8.66	5.8	0.83	0.84	1.9	90.37	5.82	2.52	8.39	3.54	6.54	0.03	192.52	51.23	7.42	9.9	4.05	5.43	1.89	0.78	0.77	0.54	0.83
3310	5.86	5.2	8.19	5.82	29.32	3.77	5.22	6	3.72	3.3	1.16	5.82	6.04	6.2	2.86	5.02	4.44	5.85	5.62	5.91	5.69	2.16	2.46	5.14	3.37	1.59	4.51	6.27	7.21	9.15	6.31	4.55	5.33	3.82	6.11	5.53	6.29
3311	98.51	5.4	9.49	4.45	84.99	28.35	1.6	465.77	4.13	1.67	13.46	4.65	18.86	2.04	3	1.74	1.04	12.26	7.49	390.5	1.06	8.91	0.52	2.82	3.14	2.16	1697.29	54.5	5.99	6.04	47.75	81.16	3.13	1.09	13.11	0.89	28.68
3312	29.33	2.94	4.18	3.08	15.59	2.04	2.29	3.36	0.89	0.66	4.5	2.6	6.44	2.44	0.9	1.22	1.15	2.75	2.98	2.75	2.86	1.26	2.31	2.8	0.53	1.02	28.55	5.73	2.89	2.88	3.04	2.8	1.75	2.19	3.05	2.76	6.09
3313	7.67	4.48	5.31	3.13	3.03	2.76	1.15	0.68	0.21	2.07	0.57	0.6	2.28	0.75	4.43	6.53	0.82	0.84	0.82	0.85	4.38	0.33	2.68	1.4	2.11	0.59	0.72	0.09	6.25	3.02	2.1	3.09	2.6	0.8	0.84	1.49	3.39
3314	8.48	6.21	6.77	3.17	8.79	1.64	1.48	19.11	4.02	4.15	3.35	2.78	6.9	2.12	8.66	5.8	0.83	0.84	1.2	12.37	5.82	2.52	8.39	3.54	6.54	0.03	57.73	4.96	7.42	3.27	4.05	1.29	1.89	0.78	0.77	0.54	0.83
3315	25.56	5.4	27.62	4.45	177.22	201.43	2.13	646.87	14.06	0.78	14.38	14.44	11.1	2.04	3.84	0.81	1.04	95.49	8.36	306.78	1.06	3.31	0.52	2.82	3.14	1.78	12591.6	103.65	6.4	5.96	40.95	68.36	7.78	0.78	23.34	0.89	27.14
3316	54.29	2.94	4.18	3.08	14.98	33.12	2.29	260.71	0.89	0.66	1.76	2.6	15.68	2.44	0.9	1.22	1.15	2.75	2.98	179.33	2.86	1.26	2.31	2.8	0.53	1.02	1160	23.64	2.89	3.58	3.04	2.8	2.49	2.19	3.05	2.76	6.09
3317	5.86	5.2	8.19	5.82	8.18	3.77	5.22	6	3.72	3.3	1.16	5.82	6.04	6.2	2.86	5.02	4.44	5.85	5.62	5.91	5.69	2.16	2.46	5.14	3.37	1.59	4.51	6.27	5.87	4.94	6.31	4.55	5.33	3.82	6.11	5.53	6.29
3318	15.87	5.4	8.47	4.45	23.27	4.82	1.18	0.52	4.13	0.78	22.64	1.81	7.02	2.04	3	185.37	1.04	0.83	0.05	0.84	1.06	3.31	0.52	2.82	3.14	1.78	2.3	4.45	5.99	5.96	0.84	2.98	0.62	0.78	1.12	0.89	5.96
3319	8.48	6.21	6.77	4.83	20.06	1.64	1.48	14	18.24	4.15	5.59	2.78	4.35	2.12	8.66	5.8	0.83	0.84	1.2	19.41	5.82	2.52	8.39	3.54	6.54	0.03	7.81	27.06	7.42	3.27	4.05	1.29	1.89	0.78	0.77	0.54	0.83
3320	6.08	5.4	8.47	4.45	52.74	16.14	1.18	202.09	4.13	0.78	0.59	0.8	0.79	2.04	3	0.81	1.04	0.83	0.05	37.24	1.06	3.31	0.52	2.82	3.14	1.78	310.54	4.45	5.99	5.96	0.84	2.98	0.62	0.78	1.12	0.89	5.96
3321	0.71	5.31	5.82	2.4	0.77	2.47	1.77	0.78	2.85	3.12	0.13	0.11	1.33	0.84	0.82	3.47	0.84	0.84	0.83	0.8	0.8	1.92	0.56	2.01	2.29	1.72	3.62	0.84	3.83	3.36	0.82	0.79	2.26	0.8	0.84	0.4	0.79
3322	74.07	5.2	18.22	5.82	39.77	236.12	5.22	824.46	6.69	3.31	6.35	5.82	25.49	6.2	2.86	5.02	4.44	33.53	5.62	376.33	5.69	48.53	2.46	5.14	3.37	1.59	7030	49.71	13.12	12.66	22.43	34.66	11.96	3.82	16.39	5.53	40.04
3323	13.51	4.48	5.31	3.13	31.38	5.64	1.15	8.27	23.48	2.07	3.3	0.6	3.07	0.75	4.43	6.53	0.82	0.84	0.82	14.78	4.38	0.57	2.68	1.4	2.11	0.59	149	2.11	6.25	3.99	2.1	3.09	2.6	0.8	0.84	1.49	48.23
3324	296.59	114.29	87.56	9.37	431.79	4662	8.23	2334	31.22	6.49	94.07	250.52	279.01	4.48	4.39	4.27	1.15	412.35	11.59	6186	2.86	40.65	20.48	12.6	6.25	10.1	10754	474.73	22.77	70.47	1220	530.75	42.68	32.41	583.38	2.76	995.88
3325	12.63	5.31	5.82	2.4	9.01	155.02	1.77	1140.12	2.85	3.12	0.86	0.11	37.06	0.84	0.82	3.47	0.84	0.84	0.83	240.96	0.8	1.92	0.56	2.01	2.29	1.72	1274.96	17.03	3.83	7.97	0.82	0.79	2.26	0.8	0.84	0.4	0.79
3326	3.04	2.94	4.18	3.08	3.78	2.04	2.29	3.36	0.89	0.66	0.93	2.6	0.9	2.44	0.9	1.22	1.15	2.75	2.98	2.75	2.86	1.26	2.31	2.8	0.53	1.02	2.14	3.11	2.89	2.88	3.04	2.8	1.58	2.19	3.05	2.76	6.09
3327	71.39	5.31	7.83	3.2	26.29	52.49	1.77	290.49	17.62	3.59	4.62	0.9	28.33	0.84	0.82	3.47	0.84	28.17	0.83	100.03	0.8	40.75	1.08	2.01	2.29	1.72	15586.5	27.38	3.83	6.95	6.07	39.45	4.53	0.8	5.34	0.4	14.92
3328	15.36	5.2	8.19	5.82	21.48	6.22	5.22	94.73	3.72	3.3	1.16	5.82	6.04	6.2	2.86	5.02	4.44	5.85	5.62	36.47	5.69	2.16	2.46	5.14	3.37	1.59	1001	6.27	5.87	4.97	6.31	6.83	5.33	3.82	6.11	5.53	6.29
3329	5.86	5.2	8.19	5.82	5.36	3.77	5.22	6	3.72	3.3	1.16	5.82	6.04	6.2	2.86	5.02	4.44	5.85	5.62	5.91	5.69	2.16	2.46	5.14	3.37	1.59	4.51	6.27	5.87	4.94	6.31	4.55	5.33	3.82	6.11	5.53	6.29
3330	64.18	4.48	5.31	3.13	3.03	92.97	1.15	960	0.91	2.07	2.27	0.6	2.42	0.75	4.43	6.53	0.82	0.84	0.82	71.45	4.38	0.41	2.68	1.4	2.11	0.59	426	66.67	6.25	5.61	2.1	3.09	2.6	0.8	0.84	1.49	141
3331	0.71	5.31	5.82	2.4	0.77	2.47	1.77	0.84	2.85	3.12	0.13	0.11	1.33	0.84	0.82	3.47	0.84	0.84	0.83	0.8	0.8	1.92	0.56	2.01	2.29	1.72	3.62	0.84	3.83	3.38	0.82	0.79	2.26	0.8	0.84	0.4	0.79
3332	6.08	5.4	8.47	4.45	38.51	233.01	1.18	754.7	4.13	6.88	4.45	0.8	1.48	2.04	3	0.81	1.04	28.79	0.4	108.22	1.06	60.08	0.52	2.82	3.14	1.78	8269.27	11.99	5.99	5.96	0.84	2.98	0.62	0.78	1.12	0.89	5.96
3333	207	44.77	98.04	7.41	91.04	17383	9.23	5890	253	12.13	22.41	13.01	287	1.76	4.43	10.75	0.82	71.65	4.3	3874	4.38	29.93	6.2	6.92	3.43	6.66	15346	107	14.22	89.31	17.88	125	27.25	14.84	2.56	1.49	3.39
3334	0.71	5.31	5.82	2.4	11.63	2.47	1.77	0.78	2.85	3.12	0.13	0.11	2.49	0.84	0.82	3.47	0.84	0.84	0.83	0.8	0.8	1.92	0.56	2.01	2.29	1.72	3.62	1.12	3.83	3.67	0.82	0.79	2.26	0.8	0.84	0.4	0.79
3335	14.24	5.2	8.19	5.82	5.36	3.77	5.22	162.15	3.72	3.3	1.16	5.82	6.04	6.2	2.86	5.02	4.44	5.85	5.62	11.71	5.69	2.16	2.46	5.14	3.37	1.59	250.72	6.67	5.87	4.94	6.31	4.55	5.33	3.82	6.11	5.53	6.29
3336	0.71	5.31	5.82	2.4	0.77	2.47	1.77	6.2	4.37	3.12	0.13	0.11	2.61	0.84	0.82	3.47	0.84	0.84	0.83	6.89	0.8	1.92	0.56	2.01	2.29	1.72	8.19	7.33	3.83	3.36	0.82	0.79	2.26	0.8	0.84	0.4	0.79
3337	75.57	5.4	8.47	4.45	38.51	28.54	1.18	351.48	4.13	0.78	14.61	0.8	1.15	2.04	3	0.81	1.04	0.83	0.05	94.62	1.06	3.31	0.52	2.82	3.14	1.78	346.81	41.12	5.99	5.96	0.84	2.98	0.62	0.78	1.12	0.89	5.96
3338	35.1	2.94	4.18	3.08	5.26	4.96	2.29	179.33	0.89	0.66	0.93	2.6	7.44	2.44	0.9	1.22	1.15	2.75	2.98	40.07	2.86	1.26	2.31	2.8	0.53	1.02	744.03	32.84	2.89	2.88	3.04	2.8	2.11	2.19	3.05	2.76	6.09
3339	21.38	5.31	5.82	2.4	0.77	2.47	1.77	0.78	3.09	3.12	0.2	0.11	5.36	0.84	0.82	3.47	0.84	0.84	0.83	0.8	0.8	1.92	0.56	2.01	2.29	1.72	3.62	8.74	3.83	3.67	0.82	0.79	2.26	0.8	0.84	0.4	0.79
3340	13.67	6.21	6.77	3.17	8.79	1.64	1.48	5.28	4.29	4.15	10.45	2.78	19.62	2.12	8.66	5.8	0.83	0.84	1.2	5.08	5.82	2.52	8.39	3.54	6.54	0.03	6.56	4.2	7.42	3.27	4.05	1.29	1.89	0.78	0.77	0.54	0.83
3341	5.86	5.2	8.19	5.82	5.36	3.77	5.22	6	3.72	3.3	1.16	5.82	6.04	6.2	2.86	5.02	4.44	5.85	5.62	5.91	5.69	2.16	2.46	5.14	3.37	1.59	4.51	6.27	5.87	4.94	6.31	4.55	5.33	3.82	6.11	5.53	6.29
3342	51.13	5.31	5.82	2.4	14.28	2.47	1.77	1.72	7.69	3.12	1.49	0.11	10.26	0.84	0.82	3.47	0.84	0.84	0.83	0.8	0.8	1.92	0.56	2.01	2.29	1.72	380.29	16.79	3.83	4.8	0.82	0.79	2.26	0.8	0.84	0.4	0.79
3343	12.45	5.4	8.47	4.45	0.85	4.82	1.18	0.52	4.13	0.78	1.77	0.8	0.79	2.04	3	0.81	1.04	0.83	0.05	0.84	1.06	3.31	0.52	2.82	3.14	1.78	2.3	4.45	5.99	5.96	0.84	2.98	0.62	0.78	1.12	0.89	5.96
3344	23.43	26.22	58.07	6.29	72.7	2729	7.6	1730	29.74	4.64	10.06	63.34	65.82	2.44	0.9	1.22	1.15	1735	11.59	1923	2.86	55.86	2.31	10.66	3.03	1.02	9580	1441	12.03	10.93	159.88	239.13	18.19	5.04	154.51	2.76	150.68
3345
3346	139.7	41.65	49.02	11.53	220.89	9012.74	11.98	3986.54	487.42	16.84	31.59	81.23	597.45	2.64	0.82	4.69	0.84	1210.17	4.05	4084.53	0.8	23.2	7.84	9.78	2.79	3.29	20294.2	1274.19	19.86	26.39	136.15	599.23	20.05	17.89	79.97	0.4	363.56
3347	7.29	2.94	4.18	3.08	3.78	2.04	2.29	3.36	0.89	0.66	2.1	2.6	3.24	2.44	0.9	1.22	1.15	2.75	2.98	2.75	2.86	1.26	2.31	2.8	0.53	1.02	2.14	3.11	2.89	2.88	3.04	2.8	1.58	2.19	3.05	2.76	6.09
3348	11.46	4.48	5.31	3.13	6.5	30.33	1.15	629	0.21	2.07	0.57	0.6	2.28	0.75	4.43	6.53	0.82	0.84	0.82	75.32	4.38	0.26	2.68	1.4	2.11	0.59	478	9.81	6.25	7.95	2.1	3.09	2.6	0.8	0.84	1.49	3.39
3349	27	12.35	93.38	11.97	235.77	50.14	8.66	747.89	160.77	32.47	17.45	10.49	124.64	22.73	3	2.32	1.85	75.45	16.66	464.2	1.56	96.38	27.54	10.4	3.14	10.46	16764.6	3794.25	136.3	30.59	233.58	554.44	60.49	5.19	64.43	63.4	109.9
3350	39.1	2.94	4.18	3.08	5.26	2.04	2.29	90.4	0.89	0.66	4.18	2.6	2.84	2.44	0.9	1.22	1.15	2.75	2.98	15.73	2.86	3.19	2.31	2.8	0.53	1.02	2316	16.59	2.89	2.88	3.04	2.8	1.75	2.19	3.05	2.76	6.09
3351	64.78	5.31	5.82	2.4	14.28	2.47	1.77	7.18	6.83	3.12	27.43	0.12	26.75	0.84	0.82	3.47	0.84	0.84	0.83	19.36	0.8	1.92	0.56	2.01	2.29	1.72	43.14	17.88	3.83	3.36	0.82	0.79	2.26	0.8	0.84	0.4	0.79
3352	92.03	24.47	23.59	4.11	28.51	922	3.44	3102	64.11	7.69	7.78	10.53	35.02	0.75	4.43	6.53	0.82	32.13	0.82	404	4.38	13.22	4.67	2.22	2.11	1.85	14678	89.03	6.25	22.68	28.72	34.67	36.11	0.8	0.84	1.49	344
3353	8.48	6.21	6.77	3.17	8.79	1.64	1.48	11.98	4.02	4.15	1.8	2.78	4.83	2.12	8.66	5.8	0.83	0.84	1.2	14.15	5.82	2.52	8.39	3.54	6.54	0.03	24.08	29.66	7.42	3.27	4.05	1.29	1.89	0.78	0.77	0.54	0.83
3354	19.98	5.2	8.19	5.82	5.36	3.77	5.22	6	3.72	3.3	1.16	5.82	6.04	6.2	2.86	5.02	4.44	5.85	5.62	13.02	5.69	2.16	2.46	5.14	3.37	1.59	4.51	10.15	5.87	4.94	6.31	4.55	5.33	3.82	6.11	5.53	6.29
3355	86.93	4.48	5.31	3.13	39.95	207	1.15	1387	1.57	2.07	1.08	0.6	17.4	0.75	4.43	6.53	0.82	0.84	0.82	238	4.38	2.71	2.68	1.4	2.11	0.59	1066	40.3	6.25	14.95	2.1	3.09	4.62	0.8	0.84	1.49	3.39
3356	50.96	5.2	8.19	5.82	13.81	3.77	5.22	274.91	3.72	3.3	2.52	5.82	6.71	6.2	2.86	5.02	4.44	5.85	5.62	155.42	5.69	2.16	2.46	5.14	3.37	1.59	334.02	14.29	5.87	4.94	6.31	4.55	5.33	3.82	6.11	5.53	6.29
3357	31.74	5.4	8.47	4.45	168.26	4.82	1.18	0.52	4.13	0.78	1.47	0.8	0.79	2.04	3	0.81	1.04	0.83	0.4	6.09	1.06	3.31	0.52	2.82	3.14	1.78	48.09	20.17	5.99	5.96	0.84	2.98	0.62	0.78	1.12	0.89	5.96
3358	23.73	2.94	4.18	3.08	19.75	3.03	2.29	21.51	1.39	0.66	15.67	2.6	20.99	2.44	0.9	1.22	1.15	2.75	2.98	31.83	2.86	1.26	2.31	2.8	0.68	1.02	2.14	7.07	3.17	3.58	3.04	2.8	3.98	2.19	3.05	2.76	6.09
3359	30.86	6.21	6.77	3.57	29.25	7.71	1.48	8.52	6.69	4.15	9.31	2.78	8.56	2.12	8.66	5.8	0.83	0.84	1.2	10.17	5.82	2.52	8.39	3.54	6.54	0.03	6.56	8.89	8.64	3.5	4.05	3.55	1.89	0.78	0.77	0.54	0.83
3360	15.22	5.4	8.47	4.45	23.27	8.97	1.18	113.13	4.13	0.78	0.59	0.8	0.79	2.04	3	0.81	1.04	0.83	0.05	24.65	1.06	3.31	0.52	2.82	3.14	1.78	2.3	6.58	5.99	5.96	0.84	2.98	0.62	0.78	1.12	0.89	5.96
3361	59.39	18.92	45.82	22.62	216.67	638.28	18.36	1078.58	19.1	18.91	58.61	241.66	300.31	2.44	0.82	3.55	0.84	323.07	12.25	1108.12	0.8	71.13	15.04	7.14	3.34	2.05	9964.54	494.46	36.53	15.11	703.5	752.68	44.22	16.35	366.47	1.62	171.31
3362	40.81	2.25	4.19	2.45	15.18	21.45	1.54	321.78	2.16	1.24	11.86	1.42	2.7	1.38	4.2	2.32	0.42	3.48	0.42	163.83	2.28	3.83	3.6	2.1	2.1	1.43	4672.23	34.57	2.42	5.41	11.05	9.36	3.84	0.39	2.24	1.04	3.42
3363	50.7	9.34	42.81	4.69	183.77	458.26	2.65	870.67	17.13	1.78	58.72	30.76	61.26	2.04	39.27	20.23	1.04	274.44	12.54	348.48	1.06	11.09	6	5.58	3.61	1.78	10873.5	270.85	19.09	5.96	439.25	785.71	30.34	7.57	220.62	0.89	85.13
3364	113.73	2.25	13.56	2.45	35.97	28.73	1.54	793.37	3.13	1.24	14.57	1.42	121.57	1.38	4.2	2.32	0.42	10.58	0.42	280.18	2.28	2.67	3.6	2.1	2.1	1.43	7020.02	46.37	2.44	9.85	19.92	17.41	7.63	1.85	0.95	1.04	76.17
3365	4.95	2.25	4.19	3.14	17.19	12.04	1.54	185.26	5.16	2.55	20.75	1.42	4.34	1.38	4.2	2.32	0.42	7.26	2.1	57.3	2.28	2.02	4.75	2.1	2.1	1.43	8220.44	14.82	2.83	12.06	1.1	6.03	9.63	0.39	0.4	1.04	7.79
3366	2.22	2.25	8.36	3.51	3.82	198.23	1.56	873.06	9.03	5.23	14.95	1.42	9.21	1.38	4.2	2.32	0.42	5.69	0.42	157.93	2.28	42.25	3.6	2.1	2.1	1.43	8185.36	30.38	3.08	14.09	8.6	16.15	7.48	0.78	0.68	1.04	27.99
3367	75.65	5.31	5.82	3.78	46.8	2.47	1.77	148.23	3.59	3.69	1.58	0.11	37.46	0.84	0.82	3.47	0.84	0.84	2.37	57.35	0.8	10.09	0.56	2.01	2.29	1.72	2556.58	47.25	3.83	18.21	0.82	0.79	3.01	0.8	0.84	0.4	0.79
3368	6.08	5.4	8.47	4.45	0.85	4.82	1.18	0.52	4.13	0.78	0.33	0.8	0.79	2.04	3	0.81	1.04	0.83	0.05	0.84	1.06	3.31	0.52	2.82	3.14	1.78	2.3	4.45	5.99	5.96	0.84	2.98	0.62	0.78	1.12	0.89	5.96
3369	435.96	67.47	175.12	45.54	610.49	5143.43	28.16	5130.39	295.79		219.76	546.22	2937.24	12.1	6.88	26.23	0.74	1534.62	36.42	6796.03		683.52	94.06	25.91	4.96	14.36	21570.7	2338.14	93.62	162.6	1031.94	2361.86	165.92	31.83	406.31	4.76
3370	11.73	2.94	4.18	3.08	7.94	2.04	2.29	3.36	0.89	0.66	20.06	2.6	6.44	2.44	0.9	1.22	1.15	2.75	2.98	2.75	2.86	1.26	2.31	2.8	0.53	1.02	2.14	4.56	3.17	2.88	3.04	2.8	3.1	2.19	3.05	2.76	6.09
3371	10.46	5.2	8.19	5.82	5.36	3.77	5.22	6	3.72	3.3	1.16	5.82	6.04	6.2	2.86	5.02	4.44	5.85	5.62	5.91	5.69	2.16	2.46	5.14	3.37	1.59	4.51	6.27	5.87	4.94	6.31	4.55	5.33	3.82	6.11	5.53	6.29
3372	7.39	5.31	5.82	2.4	0.77	2.47	1.77	0.84	2.85	3.12	8.61	0.11	5.98	0.84	0.82	3.47	0.84	0.84	0.83	0.8	0.8	1.92	1.57	2.01	2.29	1.72	3.62	0.84	3.83	3.36	0.82	0.79	2.54	0.8	0.84	0.4	0.79
3373	5.86	5.2	8.19	5.82	16.34	57.86	5.22	212.41	3.72	3.3	1.16	10.61	6.04	6.2	2.86	5.02	4.44	10.78	5.62	49.01	5.69	27.25	2.46	5.14	3.37	1.59	2305	40.38	5.87	4.94	8.43	15.12	5.33	3.82	6.11	5.53	6.29
3374	3.04	2.94	4.18	3.08	3.78	2.04	2.29	3.36	0.89	0.66	1.61	2.6	1.4	2.44	0.9	1.22	1.15	2.75	2.98	2.75	2.86	1.26	2.31	2.8	0.53	1.02	2.14	3.11	2.89	2.88	3.04	2.8	1.58	2.19	3.05	2.76	6.09
3375	132.64	22.74	48.02	8.78	97	5551.06	7.4	4885.31	147.97	21.7	38.41	66.33	518.41	0.84	0.82	4.69	0.84	203.23	2.37	4181.4	0.8	98.84	3.85	4.86	4.15	2.05	19735.7	325.54	7.22	20.03	111.85	420.46	9.27	4.01	58.21	0.4	257.38
3376	61.38	2.94	4.18	3.08	11.85	133.36	2.29	638.36	0.89	0.66	1.43	2.6	6.44	2.44	0.9	1.22	1.15	2.75	2.98	63.09	2.86	1.26	2.31	2.8	0.53	1.02	475.85	26.84	2.89	3.78	3.04	2.8	3.32	2.19	3.05	2.76	6.09
3377	0.71	5.31	5.82	2.4	12.95	2.47	1.77	6	3.59	3.12	0.2	0.11	7.24	0.84	0.82	3.47	0.84	0.84	0.83	18.36	0.8	1.92	0.56	2.01	2.29	1.72	3.62	2.41	3.83	3.36	0.82	0.79	2.26	0.8	0.84	0.4	0.79
3378	5.86	5.2	8.19	5.82	5.36	3.77	5.22	6	3.72	3.3	1.16	5.82	6.04	6.2	2.86	5.02	4.44	5.85	5.62	5.91	5.69	2.16	2.46	5.14	3.37	1.59	4.51	6.27	5.87	4.94	6.31	4.55	5.33	3.82	6.11	5.53	6.29
3379	79.28	3.76	4.18	3.08	34.96	3.85	2.29	235.56	2.55	0.92	1.81	2.6	55.06	2.44	0.9	1.22	1.15	2.75	3.16	221.15	2.86	1.26	2.31	2.8	0.75	1.02	29.59	32.59	7.16	7.87	3.04	2.8	3.32	2.19	3.05	2.76	6.09
3380	7.4	4.48	5.31	3.13	3.03	2.76	1.15	0.68	0.21	2.07	0.57	0.6	2.28	0.75	4.43	6.53	0.82	0.84	0.82	2.22	4.38	0.26	2.68	1.4	2.11	0.59	0.67	0.1	6.25	3.17	2.1	3.09	2.6	0.8	0.84	1.49	3.39
3381	274	44.53	53.83	25.43	132.52	9303.96		3678.23		11.33	95.97	62.47	969.54		6.88	0.41	0.48	358.11	11.55	3078.95		45.86	41.64	8.99	1.8	7.53	19452.8	403.82	65.16	47.01	254.19	510.63	65.6	20.69	100.4	1.37	421.68
3382	16.52	4.48	22.1	13.97	170	18.74	2.66	123	6.13	2.34	0.57	8.57	18.1	0.75	4.43	6.53	0.82	5.61	0.82	291	4.38	3.25	6.01	4.68	2.11	0.59	108	1157	33.69	18.07	25.93	57.35	41.16	0.8	0.84	1.49	16.54
3383	7.4	4.48	5.31	3.13	3.03	2.76	1.15	0.68	0.21	2.07	0.57	0.6	2.28	0.75	4.43	6.53	0.82	0.84	0.82	0.85	4.38	0.29	2.68	1.4	2.11	0.59	0.67	0.33	6.25	3.99	2.1	3.09	2.6	0.8	0.84	1.49	3.39
3384	8.52	6.21	6.77	3.17	8.79	1.64	1.48	149.41	4.02	4.15	12.78	2.78	31.55	2.12	8.66	5.8	0.83	0.84	1.2	17.31	5.82	2.52	8.39	3.54	6.54	0.03	284.42	6.09	7.42	3.27	4.05	1.29	1.89	0.78	0.77	0.54	0.83
3385	5.86	5.2	8.19	5.82	5.36	3.77	5.22	6	3.72	3.3	1.16	5.82	6.04	6.2	2.86	5.02	4.44	5.85	5.62	5.91	5.69	2.16	2.46	5.14	3.37	1.59	4.51	6.27	5.87	4.94	6.31	4.55	5.33	3.82	6.11	5.53	6.29
3386	7.88	5.2	8.19	5.82	5.36	3.77	5.22	6	3.72	3.3	1.16	5.82	6.04	6.2	2.86	5.02	4.44	5.85	5.62	5.91	5.69	2.16	2.46	5.14	3.37	1.59	4.51	6.27	5.87	4.94	6.31	4.55	5.33	3.82	6.11	5.53	6.29
3387	69.86	4.48	5.31	3.13	6.5	2.76	1.15	266	0.21	2.07	3.66	0.6	34.31	0.75	4.43	6.53	0.82	0.84	0.82	293	4.38	0.26	2.68	1.4	2.11	0.59	72.15	41.3	6.25	3.17	2.1	3.09	2.6	0.8	0.84	1.49	3.39
3388	40.78	5.31	5.82	2.4	0.77	10.8	1.77	55.69	3.42	3.12	0.84	0.11	26.56	0.84	0.82	3.47	0.84	0.84	0.83	52.54	0.8	1.92	0.56	2.01	2.29	1.72	3.62	3.74	3.83	4.8	0.82	0.79	2.26	0.8	0.84	0.4	0.79
3389	241.99	42.75	248.04	6.41	469.47	987.68	7.19	3646.01	62.47	45.99	41.94	23.25	549	2.18	3	4.29	1.04	297.66	37.48	1979.71	2.19	160.56	16.62	10.13	4.08	4.5	16941	681.61	64.69	44.51	195.28	245.9	106.56	22.75	90.81	0.89	494.42
3390	8.48	6.21	6.77	4.2	8.79	210.29	1.48	330.93	24.63	4.15	30.33	2.78	6.9	2.12	8.66	5.8	0.83	0.84	1.2	27.18	5.82	2.52	8.39	3.54	6.54	0.03	913.31	12.62	7.42	3.27	4.05	1.29	1.89	0.78	0.77	0.54	0.83
3391	21.69	16.02	26.42	8.12	72.54	1905	5.22	2107	18.09	4.75	6.94	14.8	63.86	6.2	15.1	5.02	4.44	74.73	5.62	823.74	5.69	5.51	19.1	5.14	3.94	3.09	8430	66.3	19.29	10.33	45.39	15.45	26.57	3.82	7.71	5.53	66.23
3392	92.02	5.2	17.34	5.82	30.19	519.43	5.22	1411	11.08	3.3	3.76	5.82	20.88	6.2	2.86	5.02	4.44	15.18	5.62	555.11	5.69	11.93	2.46	5.14	3.37	1.59	16626	37.3	9.05	4.94	35.6	31.41	7.3	3.82	6.11	5.53	73.76
3393	21.8	5.2	8.19	5.82	14.65	451.8	5.22	630.5	18.09	3.3	14.73	12.29	29.83	6.2	6.02	5.02	4.44	5.85	5.62	514.45	5.69	4.12	2.63	5.14	3.51	1.59	2336	77.29	5.87	4.94	125.78	54.9	5.33	3.82	24.06	5.53	78.02
3394	6.08	5.4	8.47	4.45	0.85	4.82	1.18	0.52	4.13	0.78	0.68	0.8	0.79	2.04	3	0.81	1.04	0.83	0.05	0.84	1.06	3.31	0.52	2.82	3.14	1.78	2.3	4.45	5.99	5.96	0.84	2.98	0.62	0.78	1.12	0.89	5.96
3395	24.47	6.21	6.77	3.17	8.79	1.64	1.48	6.41	4.02	4.15	27.21	2.78	7.45	2.12	8.66	5.8	0.83	0.84	1.2	11.52	5.82	2.52	8.39	3.54	6.54	0.03	6.56	42.46	7.42	3.27	4.05	1.29	1.89	0.78	0.77	0.54	0.83
3396	49.15	6.21	34.26	14.79	73.45	943.69	6.13	2293.27	11.86	4.15	49.81	76.05	71.14	2.12	8.66	5.8	0.83	83.64	6.19	797.38	5.82	9.44	8.39	5.22	6.54	0.66	10635.7	79.63	19.19	28.71	99.5	203.6	50.84	3.53	53.69	0.54	90.15
3397	27.11	2.94	4.18	3.08	3.78	2.04	2.29	3.36	0.89	0.66	2.04	2.6	1.73	2.44	0.9	1.22	1.15	2.75	2.98	2.75	2.86	1.26	2.31	2.8	0.53	1.02	2.14	12.05	2.89	2.88	3.04	2.8	1.58	2.19	3.05	2.76	6.09
3398	2.22	2.25	4.19	2.45	3.25	1.13	1.54	1.41	2.16	1.24	1.97	1.42	5.68	1.38	4.2	2.32	0.42	0.41	0.42	10.53	2.28	1.24	3.6	2.1	2.1	1.43	2.5	6.14	2.42	3.17	1.1	1.79	1.69	0.39	0.1	1.04	3.42
3399	30.89	2.94	4.18	3.08	11.85	20.74	2.29	292.45	0.9	0.66	5.31	2.6	9.53	2.44	0.9	1.22	1.15	2.75	2.98	72.76	2.86	1.26	2.31	2.8	0.53	1.02	246.44	18.88	2.89	3.98	3.04	2.8	2.9	2.19	3.05	2.76	6.09
3400	43.24	18.92	327.86	7.65	81.22	325.94	6.94	1524.43	33.89	37.65	41.27	7.2	179.44	2.12	8.66	5.8	0.83	55.09	24.73	472.41	5.82	112.92	8.39	10.67	6.54	0.66	17656.4	108.2	13.41	40.24	66.61	146.55	287.4	3.26	0.77	0.54	152.69
3401	22.58	5.4	8.47	4.45	0.85	4.82	1.18	0.52	4.13	0.78	3.64	0.8	0.79	2.04	3	0.81	1.04	0.83	0.05	0.84	1.06	3.31	0.52	2.82	3.14	1.78	2.3	4.45	5.99	5.96	0.84	2.98	0.62	0.78	1.12	0.89	5.96
3402	195.71	149.03	61.91	8.5	195.83	3192	8.23	2434	457.12	12.49	46.11	70.9	241.59	3.53	0.9	1.96	1.15	609.06	13.71	5121	2.86	51.05	22.23	13.29	4.84	4.63	11283	698.96	25.12	113.67	355.98	427.51	33.66	19.13	179.21	2.76	1028
3403	8.48	6.21	6.77	3.17	8.79	1.64	1.48	5.28	4.02	4.15	1.82	2.78	4.35	2.12	8.66	5.8	0.83	0.84	1.2	8.92	5.82	2.52	8.39	3.54	6.54	0.03	6.56	2.92	7.42	3.27	4.05	1.29	1.89	0.78	0.77	0.54	0.83
3404	7.4	4.48	5.31	3.13	3.03	2.76	1.15	0.68	0.21	2.07	0.57	0.6	2.28	0.75	4.43	6.53	0.82	0.84	0.82	0.85	4.38	0.36	2.68	1.4	2.11	0.59	0.67	0.09	6.25	3.02	2.1	3.09	2.6	0.8	0.84	1.49	3.39
3405	87.71	5.31	5.82	2.4	7.73	2.47	1.77	136.72	2.85	3.12	0.14	0.11	9.92	0.84	0.82	3.47	0.84	0.84	0.83	59.28	0.8	1.92	0.56	2.01	2.29	1.72	48.12	36.18	3.83	9.91	0.82	0.79	2.26	0.8	0.84	0.4	0.79
3406	8.48	6.21	6.77	3.17	14.22	1.64	1.48	5.28	4.02	4.15	1.87	2.78	5.59	2.12	11.46	5.8	0.83	0.84	1.2	1.65	5.82	2.52	8.39	3.54	6.54	0.03	11.02	2.92	7.42	3.27	4.05	1.29	1.89	0.78	0.77	0.54	0.83
3407	19.68	5.2	8.19	5.82	5.36	3.77	5.22	195.25	3.72	3.3	1.16	5.82	6.04	6.2	2.86	5.02	4.44	5.85	5.62	74.85	5.69	2.16	2.46	5.14	3.37	1.59	104.86	6.27	5.87	4.94	6.31	4.55	5.33	3.82	6.11	5.53	6.29
3408	84.25	7	15.33	4.11	44.2	189	3.18	1715	3.65	10.39	2.96	34.14	23.22	0.75	4.43	6.53	0.82	48.54	0.82	2700	4.38	38.01	2.68	1.76	2.11	0.59	2157	50.68	12.76	6.4	58.1	53.33	7.48	0.8	84.4	1.49	24.87
3409	27.35	6.21	6.77	5.14	20.06	15.31	1.48	262.66	6.69	4.15	7.86	2.78	47.88	2.12	8.66	5.8	0.83	9.63	1.2	128.75	5.82	5.21	8.39	3.54	6.54	0.03	704.49	15.29	7.42	7.13	4.05	2.66	2.41	0.78	0.77	0.54	0.83
3410	22.53	5.31	5.82	2.4	0.77	2.47	1.77	33.89	2.92	3.12	0.16	0.11	4.48	0.84	0.82	3.47	0.84	0.84	0.83	68.46	0.8	1.92	0.56	2.01	2.29	1.72	16.22	13.02	3.83	3.38	0.82	0.79	2.26	0.8	0.84	0.4	0.79
3411	36.93	6.21	6.77	3.17	8.79	1.64	1.48	115.04	4.02	4.15	3.19	2.78	13.91	2.12	8.66	5.8	0.83	0.84	1.2	71.22	5.82	2.52	8.39	3.54	6.54	0.03	21.41	11.93	7.42	3.27	4.05	1.29	1.89	0.78	0.77	0.54	0.83
3412	131	39.45	115	7.41	148	1467	11.72	4395	387	40.56	23.63	28.52	522	1.5	4.43	6.97	0.82	442	3.82	2900	4.38	12.57	2.68	10.94	8.54	2.79	18459	1620	82.65	24.85	174	676	11.61	12.14	93.02	1.49	3.39
3413	129	64.69	67.97	12.62	2250	5888	19.94	4112	63.62	12.62	121	468	1505	1.82	4.43	8.63	0.82	1744	11.38	5794	4.38	38.35	15.36	5.27	2.11	0.91	17025	1662	46.88	68.51	941	984	80.66	45.27	441	2.76	728
3414	20.63	2.25	4.19	2.77	61.3	9.75	1.54	269.48	5.51	1.24	18.76	1.42	7.08	1.38	4.2	2.32	0.42	9.26	0.42	98.9	2.28	1.24	3.6	2.1	2.1	1.43	9501.64	57.89	2.42	8.66	2.48	5.32	5.45	0.39	0.1	1.04	5.2
3415	82.68	5.31	8.75	6.26	80.27	51.56	1.77	1212.95	47.24	3.12	11.39	0.11	19.41	0.84	0.82	3.47	0.84	0.84	0.83	131.33	0.8	20.65	1.38	2.01	2.29	1.72	19336.4	46.02	3.83	5.9	0.82	0.79	10.72	0.8	0.84	0.4	6.49
3416	20.62	4.48	5.31	4.52	71.61	6.44	1.15	134	1.89	2.07	0.6	0.6	16.03	0.75	4.43	6.53	0.82	0.84	2.62	157	4.38	1.3	2.68	1.4	2.11	0.59	156	66.38	6.25	23.23	2.1	3.09	4.25	0.8	0.84	1.49	3.39
3417	70.65	6.21	162.88	24.73	264.15	57.58	1.48	806.97	121.05	4.15	152.76	350.21	778.83	15.97	8.66	5.8	0.83	0.84	41.82	216.45	5.82	125.87	24.3	13.81	6.54	15.66	12751.1	15.77	27.47	90.79	4.05	476.03	376.05	0.78	32.19	2.34	45.87
3418	7.4	4.48	5.31	3.13	3.03	2.76	1.15	0.68	0.21	2.07	0.57	0.6	2.28	0.75	4.43	6.53	0.82	0.84	0.82	0.85	4.38	0.26	2.68	1.4	2.11	0.59	0.67	0.09	6.25	3.02	2.1	3.09	2.6	0.8	0.84	1.49	3.39
3419	13.63	2.94	4.18	3.08	10.56	2.04	2.29	74.56	0.89	0.66	0.93	2.6	3.24	2.44	0.9	1.22	1.15	2.75	2.98	16.74	2.86	1.26	2.31	2.8	0.53	1.02	47.94	26.72	2.89	2.88	3.04	2.8	2.9	2.19	3.05	2.76	6.09
3420	38.18	6.21	6.77	3.17	8.79	40.78	1.48	425.69	4.29	4.15	6.27	18.92	4.35	2.12	8.66	5.8	0.83	3.15	1.2	180.44	5.82	2.52	8.39	3.54	6.54	0.03	272.8	22.14	7.42	3.27	4.05	2.66	1.89	0.78	0.77	0.54	0.83
3421	49.28	5.2	16.9	5.82	26.7	974.11	5.22	2282	5.54	3.3	11.98	5.82	35.2	6.2	4.57	5.02	4.44	5.85	5.62	1575	5.69	3.48	3.42	5.14	3.37	1.59	342.46	26.45	15.89	5.87	92.09	51.4	5.33	3.82	7.02	5.53	29.27
3422	8.5	2.94	4.18	3.08	3.78	2.04	2.29	3.36	0.89	0.66	0.93	2.6	1.4	2.44	0.9	1.22	1.15	2.75	2.98	2.75	2.86	1.26	2.31	2.8	0.53	1.02	2.14	3.11	2.89	2.88	3.04	2.8	1.58	2.19	3.05	2.76	6.09
3423	51.22	35.68	112.18	12.29	223.68	3630.12	11.34	4742.53	284.13	38.45	48.14	77.72	365.61	4.28	0.82	64.59	0.84	323.52	5.73	3261.7	0.8	20.4	17.54	24.5	14	3.88	20294.2	273.34	14.61	12.61	107.81	300.29	13.9	10.22	108.61	0.4	362.72
3424	5.86	5.2	8.19	5.82	23.22	3.77	5.22	6	3.72	3.3	1.16	5.82	6.04	6.2	2.86	5.02	4.44	5.85	5.62	5.91	5.69	2.16	2.46	5.14	3.37	1.59	4.51	6.27	5.87	4.94	6.31	4.55	5.33	3.82	6.11	5.53	6.29
3425	12.68	2.94	4.18	3.08	13.12	2.04	2.29	3.36	0.89	0.66	0.93	2.6	4.1	2.44	0.9	1.22	1.15	2.75	2.98	2.75	2.86	1.26	2.31	2.8	0.53	1.02	8.35	3.11	2.89	2.88	3.04	2.8	1.58	2.19	3.05	2.76	6.09
3426	17.4	5.2	8.19	5.82	8.95	3.77	5.22	6	3.72	3.3	2.92	5.82	6.04	6.2	2.86	5.02	4.44	5.85	5.62	5.91	5.69	2.16	2.46	5.14	3.37	1.59	4.51	6.27	5.87	4.94	6.31	4.55	5.33	3.82	6.11	5.53	6.29
3427	96.08	14.03	35.83	5.82	97.01	4433	5.22	2098	32.21	9.03	14.5	95.23	86.13	6.2	2.86	5.02	4.44	260.48	5.62	1890	5.69	17.27	16.23	5.14	4.58	2.29	15680	175.55	20.36	13.23	146.31	115.56	19.11	12.48	145.62	5.53	243.89
3428	10.55	6.21	6.77	3.88	26.15	11.05	1.48	964.1	4.02	4.15	2.93	2.78	4.83	2.12	8.66	5.8	0.83	0.84	1.2	616.27	5.82	2.52	8.39	3.54	6.54	0.03	483.63	9.44	8.97	3.5	4.05	11.39	7.29	0.78	0.77	0.54	0.83
3429	38.66	29.38	127.25	64.39	767.68	56.62	17.64	292.14	78.14	27.96	24.07	13.05	219.65	20.17	3	50.4	10.42	31.57	84.63	50.15	5.09	18.53	130.73	26.96	24.6	21.3	1488.4	44.67	80.55	133.73	0.84	34.28	252.89	5.63	3.65	18.88	286.46
3430	7.4	4.48	5.31	3.13	7.74	2.76	1.15	0.68	0.21	2.07	0.57	0.6	2.28	0.75	4.43	6.53	0.82	0.84	0.82	8.27	4.38	0.31	2.68	1.4	2.11	0.59	45.67	0.09	6.25	3.02	2.1	3.09	2.6	0.8	2.08	1.49	3.39
3431	7.76	4.48	5.31	3.13	31.38	2.76	1.15	7.03	0.21	2.07	0.57	0.6	5.65	0.75	4.43	6.53	0.82	0.84	0.82	11.46	4.38	0.41	2.68	1.4	2.11	0.59	8.63	10.1	6.25	16.85	2.1	3.09	2.6	0.8	0.84	1.49	3.39
3432	22.06	2.25	4.19	3.14	19.22	2.59	1.54	274.8	3.34	1.24	18.86	1.42	11.42	1.38	4.2	2.32	0.42	0.41	0.43	36.41	2.28	1.24	3.6	2.1	2.1	1.43	1990.97	14.42	2.42	7.42	1.1	2.52	3.71	0.39	0.1	1.04	6.86
3433	382	129	321	173	1225	6500	15.6	734	125	211	880	460	954	24.56	4.43	74.31	3.04	386	93	4940	5.22	335	116	99.04	42.01	51.76	3815	517	89.46	215	519	359	1040	43.71	371	37.17	7.93
3434	7.13	5.2	8.19	5.82	8.18	3.77	5.22	6	3.72	3.3	1.16	5.82	6.04	6.2	2.86	5.02	4.44	5.85	5.62	5.91	5.69	2.16	2.46	5.14	3.37	1.59	4.51	6.27	5.87	5.27	6.31	4.55	5.33	3.82	6.11	5.53	6.29
3435	7.89	2.25	7.93	3.24	17.87	30.21	1.54	266.61	4.69	1.24	8.42	1.9	12.03	1.38	4.2	2.32	0.42	4.67	1.06	57.3	2.28	1.73	3.6	2.1	2.1	1.43	548.77	9.41	3.08	9.26	1.1	6.56	1.69	0.39	0.65	1.04	6.04
3436	11.15	5.2	8.19	5.82	5.36	3.77	5.22	36.57	3.72	3.3	1.16	5.82	6.04	6.2	2.86	5.02	4.44	5.85	5.62	9.04	5.69	2.16	2.46	5.14	3.37	1.59	19.35	7.49	5.87	5.87	6.31	4.55	5.33	3.82	6.11	5.53	6.29
3437	50.15	4.48	5.31	3.13	21.37	11.01	1.15	529	1.47	2.07	2.96	0.6	30.76	0.75	4.43	6.53	0.82	0.84	0.82	70.08	4.38	0.85	2.68	1.4	2.11	0.59	2616	33.03	6.25	12.97	2.1	3.09	2.6	0.8	0.84	1.49	203
3438	41.69	2.94	4.18	3.08	3.92	2.04	2.29	126.89	0.89	0.66	2.15	2.6	5	2.44	0.9	1.22	1.15	2.75	2.98	17.42	2.86	1.26	2.31	2.8	0.53	1.02	158.39	16.62	2.89	2.88	3.04	2.8	2.11	2.19	3.05	2.76	6.09
3439	8.48	6.21	6.77	3.17	8.79	7.99	1.48	180.38	6.07	4.15	5.53	2.78	4.35	2.12	13.29	5.8	0.83	0.84	1.2	62.5	5.82	2.52	8.39	3.54	6.54	0.03	141.27	5.52	7.42	3.27	4.05	1.29	1.89	0.78	0.77	0.54	0.83
3440	141.13	5.31	8.62	5.46	106.95	6.43	1.77	96.81	45.66	3.12	7.42	0.16	24.41	0.84	0.82	6.56	0.84	10.55	0.83	77.01	0.8	3.87	2.29	2.01	2.29	1.72	1256.77	44.79	3.83	3.67	3.05	0.79	4.94	0.8	0.84	0.4	0.81
3441	395.59	31.95	21.32	4.63	62.36	15780.1	6.27	5447.73	2.85	36.51	45.05	265.21	200.35	0.98	0.82	3.47	0.84	92.16	0.83	5740.64	0.8	13.95	3.59	4.44	2.29	1.72	14927.6	134.06	10.59	30.21	50.36	150.54	8.64	14.28	29.78	0.4	604.64
3442	192.93	9.18	36.15	25.43	249.43	327.42	8.47	2628.7	38.28	19.82	103.11	86.11	407.57	2.96	6.88	0.41	0.48	124.98	6.47	1694.7	3.51	23.79	26.19	8.31	5.23	4.04	14252.9	165.13	25.24	34.17	142.16	223.78	51.1	5.98	32.84	2.32	272.96
3443	53.56	5.4	8.47	4.45	165.98	188.24	1.18	913.45	4.13	0.8	5.69	0.8	2.57	2.04	3	0.81	1.04	0.83	4.96	171.06	1.06	3.31	0.52	2.82	4.45	1.78	4978.44	19.71	5.99	8.38	0.84	2.98	1.31	0.78	1.12	0.89	5.96
3444	8.48	6.21	6.77	3.88	32.38	9.37	1.48	375.93	18.91	4.15	8.06	2.78	6.37	2.12	8.66	5.8	0.83	0.84	1.2	132.4	5.82	2.52	8.39	3.54	6.54	0.03	1564.03	44.33	7.42	3.27	4.05	1.29	4.69	0.78	0.77	0.54	0.83
3445	43.64	2.94	4.18	3.08	3.78	2.04	2.29	3.36	0.89	0.66	1.84	2.6	7.95	2.44	0.9	1.22	1.15	2.75	2.98	4.95	2.86	1.26	2.31	2.8	0.53	1.02	2.14	9.3	2.89	2.88	3.04	2.8	1.58	2.19	3.05	2.76	6.09
3446	5.86	5.2	8.19	5.82	9.74	3.77	5.22	6	3.72	3.3	1.16	5.82	6.04	6.2	2.86	5.02	4.44	5.85	5.62	5.91	5.69	2.16	2.46	5.14	3.37	1.59	4.51	6.27	5.87	4.94	6.31	4.55	5.33	3.82	6.11	5.53	6.29
3447	288.17	12.7	29.03	24.26	141.1	2990.41	4.26	5766.89	8.32	2.5	58.92	40.11	555.06	0.52	6.88	0.41	0.48	296.23	1.85	1725.41	3.51	48.09	2.34	12.16	0.46	1.85	19633.2	195.17	19.85	28.73	108.78	233.53	35.17	13.4	50.34	1.19
3448	24.76	5.31	5.82	2.4	1.84	2.47	1.77	0.78	5.81	3.12	9.81	0.11	8.22	0.84	0.82	3.47	0.84	0.84	0.83	0.8	0.8	1.92	0.56	2.01	2.29	1.72	6.42	8.25	3.83	3.36	0.82	0.79	2.26	0.8	0.84	0.4	0.79
3449	150.59	10.16	5.49	3.08	30.03	16.33	2.29	788.02	1.75	0.79	20.98	2.6	25.85	2.44	0.9	1.22	1.15	2.75	3.16	531.58	2.86	1.26	2.31	2.8	0.53	1.02	1059	116.48	2.89	2.88	3.04	2.8	4.92	2.19	3.05	2.76	17.62
3450	78.7	31.23	28.07	4.52	40.53	3776	2.29	2692	28.93	1.92	14.46	45.01	194.25	2.44	0.9	1.22	1.15	252.11	8.81	1579	2.86	15.88	3.55	3.13	4.93	1.27	7856	70.44	11.63	11.79	106.6	114.58	15.46	10.54	50.12	2.76	138.5
3451	8.48	6.21	6.77	3.17	8.79	1.64	1.48	6.41	4.02	4.15	1.8	2.78	4.35	2.12	8.66	5.8	0.83	0.84	1.2	2.45	5.82	2.52	8.39	3.54	6.54	0.03	6.56	5.52	7.42	3.27	4.05	1.29	1.89	0.78	0.77	0.54	0.83
3452	8.48	6.21	6.77	3.88	23.08	1.64	1.48	72.48	19.92	4.15	7.15	2.78	6.37	2.12	8.66	5.8	0.83	0.84	1.2	43.59	5.82	2.52	8.39	3.54	6.54	0.03	53.47	37.05	7.42	3.27	4.05	1.29	1.89	0.78	0.77	0.54	0.83
3453	68.23	18.42	227.85	6.39	65.82	3570.42	6.19	4051.76	16.23	15.35	62.2	106.81	224.1	0.84	0.82	3.47	0.84	49.63	1.46	4181.89	0.8	28.19	2.74	2.67	2.29	1.72	1561.62	72.7	6.6	31.81	85.83	218.56	25.71	6.55	20.95	0.4	317.9
3454	57.65	33.48	171.07	5.55	483.33	2078.31	6.06	3958.33	50.6	4.38	51.11	56.99	210.95	2.04	52.24	9.09	1.04	598.41	45.72	3759.97	1.85	12.39	8.88	4.05	11.7	3.19	15504	883.58	11.52	21.25	234.36	480.62	24.22	10.76	132.23	0.94	241.9
3455	130.25	23.08	55.31	11.97	963.8	4877.91	9.93	3616.53	10.2	3.5	163.86	359.78	737.79	1.19	0.82	3.47	0.84	1421.48	4.84	4263.85	0.8	343.17	4.5	4.75	2.29	1.72	18611	1211.29	15.34	36.42	302.25	612.26	24.6	27.36	245.26	0.49	381.72
3456	50.31	2.94	4.18	3.08	6.61	2.57	2.29	32.69	0.89	0.66	0.93	2.6	5	2.44	0.9	1.22	1.15	2.75	2.98	2.75	2.86	1.26	2.31	2.8	0.53	1.02	88.03	17.84	2.89	2.88	3.04	2.8	1.58	2.19	3.05	2.76	6.09
3457	57.4	4.48	5.31	4.94	53.98	19.74	1.15	579	4.54	2.07	1.01	0.6	26.27	0.75	4.43	6.53	0.82	0.84	1.33	66.52	4.38	1.3	2.68	1.4	2.11	0.59	741	40.42	6.25	22.68	2.1	3.09	4.25	0.8	0.84	1.49	3.39
3458	12.31	5.2	8.19	5.82	31.07	3.77	5.22	6	3.72	3.3	2.87	5.82	14.21	6.2	2.86	5.02	4.44	5.85	5.62	5.91	5.69	2.16	2.46	5.14	3.37	1.59	4.51	6.27	5.87	9.15	6.31	4.55	5.33	3.82	6.11	5.53	6.29
3459	650.57	33.15	62.31	30.54	104.06	8589.61	14.99	3262.36	75.41	19.65	204.62	386.77	1832.63	4.64	8.66	5.8	0.83	1499.24	23.09	4997.17	5.82	209.09	31.05	8.24	6.54	4.54	14563.6	788.15	35.77	97.04	874.92	1606.36	81.83	24.28	613.63	1.26	439.5
3460	3.04	2.94	4.18	3.08	3.78	2.04	2.29	3.36	0.89	0.66	0.93	2.6	1.73	2.44	0.9	1.22	1.15	2.75	2.98	2.75	2.86	1.26	2.31	2.8	0.53	1.02	46.69	3.11	2.89	2.88	3.04	2.8	1.58	2.19	3.05	2.76	6.09
3461	296.94	258.85	485.51	274.11	2147.9	1436.08	187.42	7298.58	516.67	202.04	146.77	230.01	751.5	127.88	12.99	344.66	58.32	133.19	203.16	6101.44	43.44	261.21	940.92	377.54	118.5	102.58	14068.7	327.65	245.97	321.8	399.8	993.24	841.87	66.29	79.3	96.42	688.29
3462	65.46	5.4	8.47	4.45	0.85	34.69	1.18	694.61	4.13	0.78	2.51	0.8	0.79	2.04	3	9.37	1.04	0.83	0.05	91.92	1.06	3.31	0.52	2.82	3.14	1.78	388.17	31.06	5.99	5.96	0.84	2.98	0.62	0.78	1.12	0.89	5.96
3463	25.58	2.94	4.18	3.08	3.78	2.04	2.29	3.36	0.89	0.66	1.29	2.6	1.09	2.44	0.9	1.22	1.15	2.75	2.98	2.76	2.86	1.26	2.31	2.8	0.53	1.02	2.14	4.24	2.89	2.88	3.04	2.8	1.58	2.19	3.05	2.76	6.09
3464	19.56	6.21	6.77	3.17	11.43	121.65	1.48	1560.38	9.88	4.15	4.58	7.66	12.68	2.12	8.66	5.8	0.83	2.74	1.2	243.45	5.82	2.52	8.39	3.54	6.54	0.03	457.44	35.67	7.42	3.27	4.05	1.29	1.89	0.78	0.77	0.54	0.83
3465	82.89	5.4	8.47	4.45	45.74	104.1	1.18	756.52	4.85	20.72	15.76	0.8	5.12	2.04	3	0.81	1.04	93.08	3.08	271.47	1.06	102.2	0.52	2.82	3.14	1.78	12058.9	172.9	5.99	5.96	0.84	2.98	2.64	0.78	1.12	0.89	11.23
3466	7.05	2.94	4.18	3.08	3.78	2.04	2.29	3.36	0.89	0.66	0.93	2.6	1.9	2.44	0.9	2.46	1.15	2.75	2.98	2.75	2.86	1.26	2.31	2.8	0.53	1.02	2.14	3.11	2.89	2.88	3.04	2.8	1.58	2.19	3.05	2.76	6.09
3467	26.96	2.94	4.18	3.08	20.33	7.26	2.29	11.19	0.89	0.66	4.18	2.6	10.07	2.44	0.9	1.22	1.15	2.75	2.98	33.86	2.86	1.26	2.31	2.8	0.62	1.02	14.59	52.49	2.89	2.88	3.04	2.8	1.58	2.19	3.05	2.76	6.09
3468	67.98	6.76	19.71	3.08	58.55	8.3	2.29	458.99	12.46	5.65	14.09	30.36	24.32	2.44	0.9	1.22	1.15	38.52	4.12	335.49	2.86	3.14	2.31	3.19	1.17	1.02	8655	287.72	9.53	8.98	64.78	52.36	15.76	2.19	43.49	2.76	40.14
3469	84.52	6.21	6.77	3.17	8.79	8.54	1.48	315.1	4.02	4.15	3.56	2.78	11.48	2.12	8.66	5.8	0.83	0.84	1.2	68.85	5.82	2.52	8.39	3.54	6.54	0.03	264.55	44.91	7.42	3.27	4.05	1.29	1.89	0.78	0.77	0.54	0.83
3470	182.11	5.73	20.07	6.52	555.9	590.14	3.98	3589.48	23.75	72.59	14.94	11.8	109.97	0.84	0.82	3.47	0.84	79.7	2.91	1070.6	0.8	367.55	2.68	3.09	2.29	2.7	20294.2	201.18	6.6	14.7	32.52	77.58	10.23	3.38	41.18	0.4	104.84
3471	610.27	49.85	40.46	8.29	120.21	4693	5.22	3840	38.31	8.47	29.35	330.11	508.08	6.2	17.13	5.02	4.44	263.94	5.82	7664	5.69	19.76	10.86	5.4	3.37	4.19	18265	180.26	31.82	83.77	275.67	183.53	36.27	26.31	30.54	5.53	855.01
3472	18.44	4.48	5.31	3.13	3.03	2.76	1.15	0.68	0.31	2.07	0.57	0.6	2.28	0.75	4.43	6.53	0.82	0.84	0.82	4.41	4.38	0.27	2.68	1.4	2.11	0.59	0.67	3.55	6.25	3.17	2.1	3.09	2.6	0.8	0.84	1.49	3.39
3473	13.69	5.4	16.99	4.45	59.54	14.88	1.18	172.15	4.13	0.97	3.12	0.8	1.15	2.04	3	0.81	1.04	0.83	0.05	30.61	1.06	3.31	0.52	2.82	3.14	1.78	36.36	14.48	6.96	5.96	0.84	2.98	5.33	0.78	1.12	0.89	5.96
3474	13.99	5.2	13.69	5.82	31.94	257.51	5.22	619.53	20.47	3.3	9.56	24.57	35.2	6.2	2.86	5.02	4.44	82.03	5.62	368.73	5.69	5.19	2.46	5.14	3.37	1.59	10155	258.24	10.12	4.94	140.04	167.95	8.07	3.82	117.24	5.53	59.05
3475	203.75	67.89	120.82	37.89	349.85	4269.7	18.65	6177.1	36.64	57.13	297.92	405.73	2039.66	6.89	6.88	6.49	0.48	739.62	26.52	5872.73	3.51	81.52	44.9	22.46	6.13	6.93	17753.6	205.54	33.58	60.99	927.62	1407.66	98.93	33.97	239.6	2.01	332.23
3476	100.64	7.32	41.55	4.45	181.6	1039.38	4.44	1691.97	20.02	7.52	12.05	54.05	18.86	2.04	3	0.81	1.04	351.06	10.27	746.47	1.06	91.61	0.52	5.17	3.14	1.78	14486.8	324.72	16.74	5.96	126.01	308.18	13.18	1.15	138.1	0.89	36.21
3477	118.47	2.25	4.19	2.45	7.99	34.99	1.54	542.32	2.7	1.24	15.94	1.42	14.29	1.38	4.2	2.32	0.42	4.19	0.42	219.74	2.28	7.77	3.6	2.1	2.1	1.43	7366.84	64.61	2.44	10.42	5.94	9.53	1.86	0.98	0.58	1.04	11.97
3478	78.86	5.2	8.19	5.82	41.5	97.66	5.22	1255	5.32	3.3	3.57	5.82	10.6	6.2	2.86	5.02	4.44	5.85	5.62	1097	5.69	17.15	2.46	5.14	3.37	1.59	15240	44.15	5.87	6.76	68.55	72.88	5.37	3.82	35.3	5.53	10.02
3479	3.04	2.94	4.18	3.08	3.78	2.04	2.29	3.36	0.89	0.66	0.93	2.6	1.24	2.44	0.9	1.22	1.15	2.75	2.98	2.75	2.86	1.26	2.31	2.8	0.53	1.02	2.14	3.11	2.89	2.88	3.04	2.8	1.58	2.19	3.05	2.76	6.09
3480	12.3	2.25	4.19	2.45	5.54	1.13	1.54	24.84	3.23	1.24	25.86	1.42	2.24	1.38	4.2	2.32	0.42	2.87	0.42	21.69	2.28	1.24	3.6	2.1	2.1	1.43	4450.29	81.09	2.42	8.05	9.17	11.91	4.09	0.39	1.33	1.04	3.42
3481	6.08	5.4	8.47	4.45	0.85	4.82	1.18	0.52	4.13	0.78	1.6	0.8	10.05	2.04	3	2.94	1.04	0.83	0.05	1.14	1.06	3.31	0.52	2.82	3.14	1.78	2.3	4.45	5.99	5.96	0.84	2.98	0.62	0.78	1.12	0.89	5.96
3482	729.59	63.82	192.31	44.99	570.85	1985.16	25.24	3569.99	321.47	65.77	227.39	273.1	3214.16	10.12	6.88	21.33	0.92	2030.63	32.75	5348.07	3.51	284.4	85.96	25.72	2.72	14.91	21623.2	2853.21	103.02	133.08	2041.76	2799.35	122.55	35.87	552.05	5.46	459.23
3483	7.4	4.48	5.31	3.13	3.03	2.76	1.15	0.68	0.21	2.07	0.57	0.6	2.28	0.75	4.43	6.53	0.82	0.84	0.82	0.85	4.38	0.27	2.68	1.4	2.11	0.59	0.67	0.09	6.25	4.4	2.1	3.09	2.6	0.8	0.84	1.49	3.39
3484	15.53	4.48	5.31	3.13	3.03	2.76	1.15	104	0.21	2.07	10.04	0.6	24.63	0.75	4.43	6.53	0.82	0.84	0.82	32.94	4.38	0.27	2.68	1.4	2.11	0.59	529	26.25	6.25	6.4	2.1	3.09	2.6	0.8	0.84	1.49	3.39
3485	32.67	2.25	4.19	2.45	12.52	8.63	1.54	313.1	3.13	1.24	13.8	1.42	5.96	1.38	4.2	2.32	0.42	4.31	0.42	84.66	2.28	11.42	3.6	2.1	2.1	1.43	7246.73	83.13	2.42	8.66	1.1	3.55	7.03	0.39	0.12	1.04	3.42
3486	18.04	2.94	4.18	3.08	3.78	2.04	2.29	3.36	0.89	0.66	3.59	2.6	0.95	2.44	0.9	1.22	1.15	2.75	2.98	3.56	2.86	1.26	2.31	2.8	0.53	1.02	2.14	29.27	2.89	2.88	3.04	2.8	1.75	2.19	3.05	2.76	6.09
3487	56.1	2.94	4.18	3.08	24.24	2.57	2.29	97.53	0.89	0.66	4.12	2.6	20.39	2.44	0.9	1.22	1.15	2.75	2.98	39.82	2.86	1.26	2.31	2.8	0.53	1.02	10.24	38.94	2.89	2.88	3.04	2.8	3.1	2.19	3.05	2.76	6.09
3488	87.91	27.85	31.23	6.29	236.97	675.36	7.42	2512	46.79	5.47	12.67	3.28	77.32	2.44	0.9	2.21	1.15	194.58	13.83	1334	2.86	7.49	4.46	9.43	3.97	2.18	11271	238.56	14.93	14.43	78.4	52.62	25.69	5.4	30.47	2.76	160.96
3489	116.71	6.21	6.77	7.65	60.89	4.27	1.48	466.57	11.2	4.15	29.12	2.78	136.95	2.12	8.66	5.8	0.83	0.84	4.38	310.97	5.82	2.93	8.39	3.54	6.54	0.03	575.63	49.46	7.42	20.92	4.05	2.66	4.69	0.78	0.77	0.54	56.62
3490	32.04	2.94	4.18	3.08	7.27	2.04	2.29	15.39	0.89	0.66	0.93	2.6	1.09	2.44	0.9	1.22	1.15	2.75	2.98	7.44	2.86	1.26	2.31	2.8	0.53	1.02	17.28	8.83	2.89	2.88	3.04	2.8	1.58	2.19	3.05	2.76	6.09
3491	45.97	5.31	5.82	2.4	0.77	8.7	1.77	264.53	2.85	3.12	0.13	0.11	3.64	0.84	0.82	3.47	0.84	0.84	0.83	51.71	0.8	1.92	0.56	2.01	2.29	1.72	310.27	30.7	3.83	4.24	0.82	0.79	2.26	0.8	0.84	0.4	0.79
3492	16.72	5.4	8.47	4.45	96.84	4.82	1.18	0.52	4.13	0.78	1.1	0.8	0.79	2.04	3	0.81	1.04	0.83	0.05	3.9	1.06	3.31	0.52	2.82	3.14	1.78	13.8	12.86	5.99	5.96	0.84	2.98	0.62	0.78	1.12	0.89	5.96
3493	35.62	5.2	8.19	5.82	44.09	3.77	5.22	122.31	3.72	3.92	7.37	5.82	10.6	6.2	2.86	5.02	4.44	5.95	5.62	58.36	5.69	3.53	2.46	5.14	3.37	1.59	3294	48	9.77	16.62	6.31	4.55	8.07	3.82	6.11	5.53	6.29
3494	7.78	4.48	5.31	3.13	3.03	44.98	1.15	25.54	0.21	2.07	1.81	0.6	2.28	0.75	4.43	6.53	0.82	0.84	0.82	14.34	4.38	0.46	2.68	1.4	2.11	0.59	204	0.09	6.25	3.02	2.1	3.09	2.6	0.8	0.84	1.49	3.39
3495	42.33	21.94	206.07	6.12	347.57	5930.74	10.23	2982.52	41.14	3.6	206.19	214	385.58	2.04	11.97	4.89	1.04	1006.15	30.8	4097.82	2.11	37.86	12.29	18.27	13.11	3.75	15240	576.43	24.72	31.41	279.5	471.66	41.95	22.4	244.36	0.89	287.04
3496	217.09	65.89	47.77	15.82	369.47	9854.8	16.15	7032.91	7.59	16.55	61.54	100.5	319.33	4	0.82	16.02	0.84	45.32	8.67	5311.2	0.8	19.05	10.37	5.87	2.29	4.94	19737.4	190.8	28.99	83.02	168.06	295.36	38.49	20.09	51.3	0.95	709.63
3497	8.48	6.21	6.77	3.17	8.79	1.64	1.48	5.28	4.02	4.15	2.14	2.78	4.35	2.12	8.66	5.8	0.83	0.84	1.2	1.65	5.82	2.52	8.39	3.54	6.54	0.03	6.56	2.92	7.42	3.27	4.05	1.29	1.89	0.78	0.77	0.54	0.83
3498	29.28	51.33	6.77	3.17	11.43	1.64	1.48	102.66	4.02	4.15	3.95	3.83	6.37	2.12	8.66	5.8	0.83	0.84	1.2	53.72	9.29	2.52	8.39	3.54	6.54	0.03	87.59	9.8	7.42	5.69	4.05	1.29	1.89	0.78	0.77	0.54	0.83
3499	17.18	2.94	4.18	3.08	14.98	2.35	2.29	26.65	1.57	2.55	1.86	2.6	7.44	2.44	0.9	1.22	1.15	9.58	2.98	15.74	2.86	1.33	2.31	2.8	0.53	1.02	1424	83.29	2.89	2.88	3.04	2.8	1.93	2.19	3.05	2.76	6.09
3500	8.48	6.21	6.77	3.17	14.22	1.64	1.48	134.4	6.07	4.15	1.8	2.78	4.35	2.12	8.66	5.8	0.83	0.84	1.2	16.64	5.82	2.52	8.39	3.54	6.54	0.03	205.22	13.3	7.42	7.83	4.05	1.29	1.89	0.78	0.77	0.54	0.83
3501	31.21	5.4	12.21	6.97	113.7	4.82	1.18	172.15	4.3	1.15	2.47	0.8	14.91	2.04	3	0.81	1.04	0.83	6.64	219.62	1.06	3.31	0.52	2.82	3.14	1.78	60.18	21.37	13.35	19.47	0.84	2.98	6.53	0.78	1.12	0.89	7.95
3502	28.03	2.94	4.18	3.08	25.87	2.04	2.29	35.11	1.06	0.66	0.93	2.6	4.54	2.44	0.9	1.22	1.15	2.75	2.98	14.15	2.86	1.26	2.31	2.8	0.53	1.02	122.64	12.14	3.17	7.12	3.04	2.8	3.76	2.19	3.05	2.76	6.09
3503	66.99	19.51	29.16	8.42	45.56	9515.58	5.76	3730.27	9.52	7.05	23.35	23.12	273.86	0.84	0.82	4.46	0.84	150.27	1.78	618.9	0.8	28.74	3.97	2.88	2.29	1.89	8851.32	60.15	11.28	7.47	79.42	294.29	10.88	7.51	44.72	0.44	91.72
3504	126.63	12.71	58.93	5.82	101.59	9348	5.22	5601	42	3.98	57.78	106.66	168.27	6.2	3.2	5.02	4.44	373.15	6.36	5799	5.69	11.69	6.04	9.74	5.33	1.59	6223	140.13	24.13	12.37	132.24	119.49	27.27	10.99	75.54	5.53	240.69
3505	0.71	5.31	5.82	2.4	0.77	2.47	1.77	0.78	2.85	3.12	0.91	0.11	2.86	0.84	0.82	3.47	0.84	0.84	0.83	0.8	0.8	1.92	0.56	2.01	2.29	1.72	3.62	0.84	3.83	3.67	0.82	0.79	2.26	0.8	0.84	0.4	0.79
3506	0.71	5.31	5.82	2.4	0.77	2.47	1.77	0.78	2.85	3.12	0.17	0.11	1.49	0.84	0.82	8.85	0.84	0.84	0.83	0.8	0.8	1.92	0.7	2.01	2.29	1.72	3.62	0.84	3.83	3.36	0.82	0.79	2.26	0.8	0.84	0.4	0.79
3507	9.04	4.48	5.31	3.13	3.03	2.76	1.15	0.68	0.21	2.07	0.57	0.6	2.28	0.75	4.43	6.53	0.82	0.84	0.82	0.85	4.38	0.26	2.68	1.4	2.11	0.59	0.67	0.09	6.25	3.99	2.1	3.09	2.6	0.8	0.84	1.49	3.39

## Sheet: STATUS explained
Status	FLU Positive/negative	comments
index	positive	index case
Flu-positive contact	positive	contact of an index person
Converted flu-positive contact	positive	contact of an index person
negative	negative	Influenza negative, with ILI
contact	negative	Influenza negative, no symptoms at all
